# Supplementary material for: Change in staff perspectives on indwelling urinary catheter use after implementation of an intervention bundle in seven Swiss acute care hospitals: results of a before/after survey study
Source: PubMed Central journal article supplement — BMJ Open. 2019 Oct 28;9(10):e028740. doi: 10.1136/bmjopen-2018-028740 (PMC6830685; doi:10.1136/bmjopen-2018-028740), 2019-10-28
Supplement: bmjopen-2018-028740.draft_revisions.pdf [file bmjopen-2018-028740.draft_revisions.pdf]

# BMJ Open

BMJ Open is committed to open peer review. As part of this commitment we make the peer review history of every article we publish publicly available.

When an article is published we post the peer reviewers' comments and the authors' responses online. We also post the versions of the paper that were used during peer review. These are the versions that the peer review comments apply to.

The versions of the paper that follow are the versions that were submitted during the peer review process. They are not the versions of record or the final published versions. They should not be cited or distributed as the published version of this manuscript.

BMJ Open is an open access journal and the full, final, typeset and author-corrected version of record of the manuscript is available on our site with no access controls, subscription charges or pay-per-view fees (<http://bmjopen.bmj.com>).

If you have any questions on BMJ Open's open peer review process please email [info.bmjopen@bmj.com](mailto:info.bmjopen@bmj.com)

# BMJ Open

## Change in staff perspectives on indwelling urinary catheter use after implementation of an intervention bundle: Results of a before/after survey study

|                               |                                                                                                                                                                                                                                                                                                                                                                                                                                                                                                                                                                                                                                                                                                                                                                                                                                                          |
|-------------------------------|----------------------------------------------------------------------------------------------------------------------------------------------------------------------------------------------------------------------------------------------------------------------------------------------------------------------------------------------------------------------------------------------------------------------------------------------------------------------------------------------------------------------------------------------------------------------------------------------------------------------------------------------------------------------------------------------------------------------------------------------------------------------------------------------------------------------------------------------------------|
| Journal:                      | <i>BMJ Open</i>                                                                                                                                                                                                                                                                                                                                                                                                                                                                                                                                                                                                                                                                                                                                                                                                                                          |
| Manuscript ID                 | bmjopen-2018-028740                                                                                                                                                                                                                                                                                                                                                                                                                                                                                                                                                                                                                                                                                                                                                                                                                                      |
| Article Type:                 | Research                                                                                                                                                                                                                                                                                                                                                                                                                                                                                                                                                                                                                                                                                                                                                                                                                                                 |
| Date Submitted by the Author: | 14-Jan-2019                                                                                                                                                                                                                                                                                                                                                                                                                                                                                                                                                                                                                                                                                                                                                                                                                                              |
| Complete List of Authors:     | Niederhauser, Andrea; Swiss Patient Safety Foundation<br>Züllig, Stephanie; Swiss Patient Safety Foundation<br>Marschall, Jonas; Swissnos National Center for Infection Control; Bern University Hospital, Department of Infectious Diseases<br>Schweiger, Alexander; Swissnos National Center for Infection Control; Basel University Hospital, Department of Infectious Diseases and Hospital Epidemiology<br>John, Gregor; Hopital neuchatelois, Department of Internal Medicine<br>Kuster, Stefan; Swissnos National Center for Infection Control; University and University Hospital Zurich, Division of Infectious Diseases and Hospital Epidemiology<br>Schwappach, David; Swiss Patient Safety Foundation; University of Bern, Institute of Social and Preventive Medicine (ISPM)<br>Safe urinary catheterization collaboration group, progress! |
| Keywords:                     | Patient Safety, indwelling urinary catheter, survey, intervention bundle, perception                                                                                                                                                                                                                                                                                                                                                                                                                                                                                                                                                                                                                                                                                                                                                                     |
|                               |                                                                                                                                                                                                                                                                                                                                                                                                                                                                                                                                                                                                                                                                                                                                                                                                                                                          |

SCHOLARONE™  
Manuscripts

## Change in staff perspectives on indwelling urinary catheter use after implementation of an intervention bundle: Results of a before/after survey study

Running title: Change in staff perspectives

Andrea Niederhauser MPH<sup>1</sup>

Stephanie Züllig PhD<sup>1</sup>

Jonas Marschall MD<sup>2,3</sup>

Alexander Schweiger MD<sup>2,4</sup>

Gregor John MD<sup>5</sup>

Stefan P Kuster MD<sup>2,6</sup>

David LB Schwappach PhD<sup>1,7</sup>

and progress! Safe urinary catheterization collaboration group

- 1 Swiss Patient Safety Foundation, Zurich, Switzerland
- 2 Swissnos National Center for Infection Control, Bern, Switzerland
- 3 Department of Infectious Diseases, Bern University Hospital, Bern, Switzerland
- 4 Department of Infectious Diseases and Hospital Epidemiology, Basel University Hospital, Basel, Switzerland
- 5 Department of Internal Medicine, Hôpital neuchâtelois, Neuchâtel, Switzerland
- 6 Division of Infectious Diseases and Hospital Epidemiology, University and University Hospital Zurich, Zurich, Switzerland
- 7 Institute of Social and Preventive Medicine (ISPM), University of Bern, Bern, Switzerland

progress! Safe urinary catheterization collaboration group\*:

- Adriana Degiorgi (Ente Ospedaliero Cantonale, Lugano Civico)
- Thomas Bregenzer (Spital Lachen)
- Stefan P Kuster (University and University Hospital Zurich)
- Marianne Laguardia (Inselspital Universitätsspital Bern)
- Isabelle Montavon-Blondet (Hôpital neuchâtelois)
- Jasmin Perret (Kantonsspital Winterthur)
- Vineeta Bansal (Kantonsspital Winterthur)
- Anja Waltenspül (Luzerner Kantonsspital)
- Sonja Bertschy (Luzerner Kantonsspital)

\*non-author contributors

Corresponding author:

Andrea Niederhauser

Asylstrasse 77

CH-8032 Zurich

Phone: +41 43 244 14 80

Fax: +41 43 244 14 81

E-mail: niederhauser@patientensicherheit.ch

Word count abstract: 248

Word count manuscript: 3772 words

Key words: indwelling urinary catheter, survey, patient safety, perception, intervention bundle

## Abstract

**Objective:** To evaluate change in staff perspectives towards indwelling urinary catheter (IUC) use after implementation of a one-year quality improvement project.

**Design:** Repeated cross-sectional survey at baseline (October 2016) and 12-month follow-up (October 2017).

**Setting:** Seven acute care hospitals in Switzerland

**Participants:** The survey was targeted at all nursing and medical staff members working at the participating hospitals at the time of survey distribution. A total of 1,579 (49% response rate) resp. 1,527 (47% response rate) eligible staff members participated in the two survey periods.

**Intervention:** A multimodal intervention bundle, consisting of an evidence-based indication list, daily re-evaluation of ongoing catheter need and staff training, was implemented over the course of 9 months.

**Main Outcome Measures:** Staff knowledge (15 items), perception of current practices and culture (scale 1-7), self-reported responsibilities (multiple-response question) and determinants of behavior (scale 1-7) before and after implementation of the intervention bundle.

**Results:** The mean number of correctly answered knowledge questions increased significantly between the two survey periods ( $T_0$ : 10.4,  $T_1$ : 11.0,  $p < 0.001$ ). Self-reported responsibilities in regard to IUC management by nurses and physicians changed only slightly over time. Perception of current practices and culture in regard to safe urinary catheter use increased significantly ( $T_0$ : 5.3,  $T_1$ : 5.5,  $p < 0.001$ ). Significant changes were also observed for determinants of behavior ( $T_0$ : 5.3,  $T_1$ : 5.6,  $p < 0.001$ ).

**Conclusion:** Staff members had better knowledge of catheter-associated risks, more positive perceptions of current practices and stronger beliefs regarding restrictive urinary catheter use after the implementation of a multi-modal intervention bundle

## ARTICLE SUMMARY

### Strengths and limitations of this study

- The repeated survey design allowed us to assess changes in staff perspectives after implementation of a quality improvement intervention. Sustainability of the effects over time however could not be evaluated.
- Using self-generated identification codes to match respondents in the two surveys, it was possible to evaluate if results obtained on the group level quite represent results on the individual participant level.
- No control group was included in the study design. It is possible that other trends or measures within the hospitals may have affected the outcomes.

## INTRODUCTION

Although indwelling urinary catheters (IUCs) are commonly used in acute care hospitals, an appropriate medical indication is often missing [1,2]. IUCs are associated with urinary tract infections (UTI) and non-infectious complications such as hematuria and urethral injury. The reduction of IUC use is therefore a key measure to increase patient safety [3–7].

Several quality improvement (QI) studies have shown that avoiding inappropriate IUC use prevents urinary catheter harm [8–11]. Common to these studies is the implementation of a multimodal intervention bundle focusing on the reduction of unnecessary catheter use, proper insertion techniques and safe catheter maintenance. Successful bundles consist of catheter restriction protocols providing appropriate indications for catheter use and suggesting alternative urine collection methods, evaluation strategies such as reminders and/or stop orders to assess ongoing catheter need and prompt removal of unnecessary catheters, as well as educational interventions to increase awareness among healthcare workers and ensure safe catheter handling [12].

In addition to best practices, changes in behavior and culture – the so-called socio-adaptive component – are considered a core element of quality improvement efforts [13,14]- The organizational culture, which may be described as “the way we do things around here” [15] is known to have a favorable influence on patient safety, although the evidence for a direct causative effect on patient outcome is weak [16,17]. Several studies suggest that changes in staff knowledge and attitudes are needed to improve practice in regard to appropriate catheter utilization and prevention of catheter-associated infections [18–23]. However, to our knowledge only few studies [e.g.24–26] have reported the effects of a multi-modal intervention bundle on staff knowledge, perceptions and beliefs.

To promote safe urinary catheter use in Swiss hospitals, a national QI project was developed and conducted by the Swiss Patient Safety Foundation in partnership with Swissnoso, the National Center for Infection Control. The QI project was modeled after other successful QI initiatives in the US [8,9]. The overall project goal was to reduce IUC use and to promote safe catheter insertion and maintenance by implementing an evidence-based intervention bundle in seven Swiss acute care hospitals.

With the present study, we aimed to assess the changes in staff perspectives in the participating hospitals using survey data collected before and after implementation of the intervention bundle. We hypothesized that the intervention bundle may affect staff members differently depending on their tasks, responsibilities and familiarity with catheterization. We therefore stratified results according to professional group, managerial function (a proxy for hierarchical status and clinical

1  
2  
3  
4 proximity) and frequency of catheter use in order to explore changes within these groups over time.  
5  
6 Furthermore, in before/after study designs, data from two (or more) cross-sectional survey waves  
7 are commonly analyzed on group level to evaluate short term effects of an intervention [27–29].  
8  
9 However, given the high staff turnover in hospitals and self-selection of participants, it is possible  
10 that survey participants are not identical at the different measurement points. Thus, documented  
11 changes in staff perspectives between two time points may merely be due to a different  
12 composition of participant groups. We therefore used the self-generated identification code  
13 technique [30] to anonymously match respondents in the two surveys. This allowed us to compare  
14 the effects observed in the overall sample to the effects observed in a sub-sample of matched  
15 participants, for whom we can assume that they had been working at the hospitals for the entire  
16 duration of the project.  
17  
18  
19  
20  
21

## 22 **METHODS**

### 23 **Setting**

24  
25  
26  
27 The QI project consisted of two parts, a campaign to raise awareness among health care workers  
28 and an intervention that was implemented in seven pilot hospitals. For the campaign,  
29 recommendations on safe IUC use in acute care hospitals [31] were developed and disseminated  
30 to all acute care hospitals (including pilot hospitals) in Switzerland after collection of baseline data  
31 in the pilot hospitals (November 2016). The intervention focused on the implementation of an  
32 evidence-based intervention bundle in seven pilot hospitals over the course of nine months (Feb-  
33 Oct 2017). The participating hospitals contractually committed to implement the three main  
34 components of the bundle: an evidence-based indication list for urinary catheterization (appendix  
35 1), a process to evaluate and document the continued need for catheterization on a daily basis,  
36 and staff education on proper catheter insertion and maintenance. For the latter, hospitals were  
37 required to provide theoretical trainings on catheter-associated complications to all nursing and  
38 medical staff members working on the pilot units. They were encouraged to offer practical trainings  
39 for catheter insertion (optional). The hospitals (1 small local hospital, 4 mid-sized regional hospitals  
40 and 2 university hospitals) were recruited to represent different organizational types and  
41 geographic regions. Each hospital could decide which units participated in the project; however,  
42 the participation of the emergency department was mandatory. At each site, interdisciplinary  
43 project teams, generally consisting of physicians, nurses and representatives from quality  
44 management and the infection prevention unit were responsible for implementing the intervention  
45 bundle in the participating organizational units. To encourage knowledge exchange between the  
46 local project teams, two full-day workshops were organized at the beginning and the end of the  
47 intervention phase. The intervention was accompanied by a before/after surveillance and a  
48  
49  
50  
51  
52  
53  
54  
55  
56  
57  
58  
59  
60

1  
2  
3  
4 before/after staff survey. This publication will focus on the results from the staff surveys and their  
5 changes over time.  
6  
7

## 8 **Study design**

9  
10 To collect data on staff perspectives regarding IUC use, we conducted a written survey during two  
11 time periods. The baseline survey ( $T_0$ ) took place in October 2016, four months before the  
12 participating hospitals started to implement the intervention bundle. The follow-up survey ( $T_1$ ) took  
13 place one year later in October 2017. At that point, all hospitals had implemented the intervention  
14 bundle and had been working with the new processes for six to eight months. The target  
15 population consisted of surgical positioning specialists, nurses (healthcare assistants, registered  
16 nurses and nursing managers) and physicians (residents, senior and chief physicians) working on  
17 the participating units at the time of the survey. Staff members not involved in direct patient care,  
18 healthcare workers in education and affiliated physicians were excluded.  
19  
20  
21  
22  
23  
24  
25

## 26 **Questionnaire**

27  
28 The 55-item standardized questionnaire was developed by the authors based on prior survey  
29 research conducted during a similar improvement project [32,33], and a review of existing surveys  
30 reported in the literature [18–22]. The German version of the questionnaire was pretested among  
31 42 physicians and nurses from three hospitals not participating in the project. Based on their  
32 feedback, minor modifications were made to increase validity. The final version was translated into  
33 French and Italian by professional translators. Translations were reviewed by four native speakers  
34 per language.  
35  
36  
37  
38  
39

40 The questionnaire consisted of four thematic sections. The first section entailed a 15-item  
41 knowledge test on prevalence, risk factors and prevention of catheter-associated complications, as  
42 well as appropriate reasons for catheter placement. The second section included 13 items  
43 assessing respondents' perception regarding good practices and cultural factors for safe IUC use  
44 within the organization. Items were rated on a 7-point Likert scale from "strongly disagree" (1) to  
45 "strongly agree" (7). Two items were negatively worded and were reverse coded for data analysis.  
46 The content of the first two sections of the questionnaire was in line with the above-mentioned  
47 recommendations for safe catheter use [31]. The third section examined self-perceived  
48 responsibilities in regard to catheter prescription, placement and care by means of one multiple-  
49 response question. The fourth section assessed determinants of personal behavior in regard to the  
50 reduction of urinary catheters. Items for this section were developed based on the theory of  
51 planned behavior [34]. This theory states that an individual's intention to perform a behavior is  
52 largely determined by three factors, namely a favorable or unfavorable evaluation of the behavior  
53  
54  
55  
56  
57  
58  
59  
60



1  
2  
3  
4 (attitudes), the perceived social expectations to perform or not perform the behavior (subjective  
5 norms) and the perceived capability to perform the behavior (perceived behavioral control) [34,35].  
6 In our questionnaire, the three constructs (attitudes, subjective norms and perceived behavioral  
7 control) were measured with five items each. All 15 items were rated on a 7-point Likert scale from  
8 “strongly disagree” (1) to “strongly agree” (7). Two items were negatively worded and were reverse  
9 coded for analysis.  
10  
11  
12  
13

14 The questionnaire also included a section on demographics and experience with placing urinary  
15 catheters. On the first page of the questionnaire, participants were asked to generate an 8-digit  
16 code consisting of three elements: the mother’s initials (maiden name), father’s initials and  
17 mother’s birth year. We used the same questionnaire at both time points. For the follow-up survey,  
18 we included four additional questions that specifically referred to the intervention bundle. All other  
19 items remained unaltered.  
20  
21  
22  
23  
24

### 25 **Data collection**

26 Each local project team was required to identify all staff members from the target population,  
27 inform and invite them to participate in the survey and distribute the print version of the  
28 questionnaire. In some sites, questionnaires were handed out during shift reports or other staff  
29 events; in others they were distributed to internal mail boxes. In one hospital, questionnaires were  
30 sent to private home addresses. Participation in the survey was voluntary and anonymous. The  
31 returning of the questionnaire was considered informed consent.  
32  
33  
34  
35  
36

### 37 **Ethics**

38 Approval for the quality improvement project and all data collection was obtained from the Lead  
39 Ethics Committee of the Canton of Bern, Switzerland (no. 2016-00682).  
40  
41  
42  
43

### 44 **Data analysis**

45 Descriptive statistics were calculated for each item. Missing values were excluded from analysis  
46 (pairwise exclusion). Chi-squared tests were used to determine differences in sample composition.  
47 A “knowledge score” was generated consisting of the number of correctly answered questions out  
48 of 15. Cronbach’s alpha was calculated to determine internal consistency of the 13-item perception  
49 scale and the 15-item behavior scale. For both scales a mean scale score and 95% confidence  
50 interval was computed. Knowledge score and mean scale scores were computed for the overall  
51 sample and stratified by professional group (nurses/physicians), managerial function (with/without)  
52 and frequency of catheter placement (frequent/infrequent user). Frequent users were defined as  
53 healthcare workers placing a catheter a few times a month or more often; infrequent users as  
54  
55  
56  
57  
58  
59  
60

1  
2  
3  
4 placing a catheter a few times a year or less often. Changes between time points were determined  
5 for the overall sample and each subgroup by means of *t*-tests for independent samples.  
6  
7

8 To analyze the sub-sample of matched participants, self-generated IDs were matched based on  
9 the 8-digit code and hospital affiliation. Cases with identical codes or missing data were excluded.  
10 For matched participants, knowledge score and mean scale scores were computed. Change  
11 between time points was determined by means of *t*-test for paired samples. Mixed analysis of  
12 variance was conducted to determine if participation in theoretical and practical training had an  
13 effect on knowledge scores over time.  
14  
15  
16  
17

18 All tests were two-sided and a *p*-value <0.05 was considered statistically significant. Cohen's *d*  
19 was calculated as a measure of effect size. For paired samples, the formula  $t_c$  as described in  
20 Dunlap et al [36] was used to calculate *d*. As an orientation for interpreting the importance of the  
21 effect, we used the following classification: 0.2=small effect, 0.5=medium effect and 0.8=large  
22 effect. [37] All analyses were performed with Stata version 14.1 (StataCorp, College Station,  
23 Texas).  
24  
25  
26  
27

## 28 **Patient and public involvement**

29 Patients or public were not involved in any stages of this study.  
30  
31  
32

## 33 **RESULTS**

### 34 **Response rate and study sample**

35  
36 1,579 out of 3,245 eligible staff members participated in the baseline survey (48.7% response rate)  
37 and 1,527 out of 3,235 eligible staff members participated in the follow-up survey (47.2% response  
38 rate). The proportion of questionnaires received from each hospital in the total sample was similar  
39 in both waves (*p*=0.39). The characteristics of the study samples at  $T_0$  and  $T_1$  are provided in table  
40 1. Sample composition differed slightly in regard to age (*p*=0.03), profession (*p*=0.04) and work unit  
41 between the two time points (*p*=0.02).  
42  
43  
44  
45  
46  
47

48 Almost all of the 3,106 participants in both survey periods generated an 8-digit ID. At baseline, 35  
49 respondents (2.2%) had missing values on each of the three code elements and the sample  
50 contained 3 sets of identical IDs. At follow-up, 51 respondents (3.3%) did not provide an 8-digit ID  
51 and 2 sets of identical IDs were found. For 420 respondents, we were able to successfully match  
52 the 8-digit identification code and hospital affiliation. This represents 27.5% of the 1,527 potential  
53 matches. 1,118 IDs were only present at  $T_0$  and 1,052 IDs were only present at  $T_1$ .  
54  
55  
56  
57  
58  
59  
60

**Table 1. Study sample characteristics**

|                                                                     | T <sub>0</sub><br>n = 1,579 | T <sub>1</sub><br>n = 1,527 |
|---------------------------------------------------------------------|-----------------------------|-----------------------------|
| Participants per hospital, n (%) *                                  |                             |                             |
| Hospital A (approx. 900 beds)                                       | 221 (14.0)                  | 223 (14.6)                  |
| Hospital B (approx. 800 beds)                                       | 154 (9.8)                   | 170 (11.1)                  |
| Hospital C (approx. 500 beds)                                       | 138 (8.7)                   | 127 (8.3)                   |
| Hospital D (approx. 500 beds)                                       | 362 (22.9)                  | 325 (21.3)                  |
| Hospital E (approx. 400 beds)                                       | 347 (22.0)                  | 342 (22.4)                  |
| Hospital F (approx. 300 beds)                                       | 284 (18.0)                  | 250 (16.4)                  |
| Hospital G (approx. 100 beds)                                       | 73 (4.6)                    | 90 (5.9)                    |
| Females, n (%)                                                      | 1,187 (77.6)                | 1,191 (79.7)                |
| Age in years (mean, SD) +                                           | 36.8 (10.5)                 | 35.9 (10.5)                 |
| Profession, n (%) +                                                 |                             |                             |
| Nurse                                                               | 1,050 (69.1)                | 1,084 (72.8)                |
| Physician                                                           | 350 (23.0)                  | 288 (19.3)                  |
| Other                                                               | 120 (7.9)                   | 117 (7.9)                   |
| With managerial function, n (%)                                     | 232 (16.4)                  | 193 (13.9)                  |
| Years working in this hospital, n (%)                               |                             |                             |
| < 2 years                                                           | 376 (24.5)                  | 380 (25.4)                  |
| 2 to < 5 years                                                      | 385 (25.0)                  | 357 (23.9)                  |
| 5 to < 10 years                                                     | 264 (17.2)                  | 271 (18.1)                  |
| 10 to < 20 years                                                    | 307 (20.0)                  | 297 (19.9)                  |
| ≥ 20 years                                                          | 206 (13.4)                  | 190 (12.7)                  |
| Work unit in the past three months, n (%) +                         |                             |                             |
| Ward                                                                | 906 (58.5)                  | 963 (63.9)                  |
| Emergency department                                                | 248 (16.0)                  | 190 (12.6)                  |
| Intensive care unit                                                 | 144 (9.3)                   | 129 (8.6)                   |
| Operating room                                                      | 146 (9.4)                   | 141 (9.4)                   |
| Other                                                               | 104 (6.7)                   | 85 (5.6)                    |
| Overall experience with catheter placement throughout career, n (%) |                             |                             |
| Never                                                               | 26 (1.7)                    | 30 (2.0)                    |
| 1-5 times                                                           | 169 (11.0)                  | 171 (11.4)                  |
| 6-20 times                                                          | 341 (22.2)                  | 370 (24.6)                  |
| > 20 times                                                          | 1,002 (65.2)                | 931 (62.0)                  |
| Frequency of catheter placement in current position, n (%)          |                             |                             |
| Frequent user                                                       | 690 (44.2)                  | 618 (41.1)                  |
| Infrequent user                                                     | 871 (55.8)                  | 885 (58.9)                  |

Note: Due to rounding percentages may not always add up to 100%.

\* In the larger hospitals, not all of the departments participated in the project

+ Characteristics differ significantly between the two time periods ( $p < 0.05$ )

T<sub>0</sub>=baseline survey, T<sub>1</sub>=follow-up survey

Frequent user=places a catheter a few times a month or more often

Infrequent user=places a catheter a few times a year or less often

## Knowledge

For the overall study sample, the mean number of correctly answered knowledge items increased significantly between  $T_0$  and  $T_1$  ( $p < 0.001$ ) (table 2). Subgroup analysis indicates that knowledge scores increased in particular for nurses, staff members without managerial function and staff members frequently placing catheters. However, their knowledge scores at follow-up still remained lower compared to the scores of physicians, staff members with managerial function and infrequent users. Knowledge scores increased more for participants with a matched ID compared to unmatched participants. Effect sizes for the changes between the time points were small to moderate. Percentages of correct answers for each of the 15 items are provided in appendix 2.

**Table 2. Mean number of correct answers provided for 15 knowledge items**

|                                 | Mean $T_0$ (95% CI) | $n_{T_0}$ | Mean $T_1$ (95% CI) | $n_{T_1}$ | p-value | Effect size |
|---------------------------------|---------------------|-----------|---------------------|-----------|---------|-------------|
| Overall sample                  | 10.4 (10.3;10.5)    | 1,579     | 11.0 (10.9;11.1)    | 1,527     | <0.001  | 0.29        |
| Professional group              |                     |           |                     |           |         |             |
| Nurses                          | 10.2 (10.1;10.4)    | 1,050     | 10.9 (10.8;11.0)    | 1,084     | <0.001  | 0.35        |
| Physicians                      | 11.1 (11.0;11.3)    | 350       | 11.4 (11.2;11.6)    | 288       | 0.047   | 0.16        |
| Managerial function             |                     |           |                     |           |         |             |
| With                            | 11.3 (11.1;11.5)    | 232       | 11.6 (11.4;11.9)    | 193       | 0.058   | 0.19        |
| Without                         | 10.3 (10.1;10.4)    | 1,187     | 10.9 (10.8;11.0)    | 1,199     | <0.001  | 0.33        |
| Frequency of catheter placement |                     |           |                     |           |         |             |
| Frequent user                   | 10.0 (9.8;10.1)     | 690       | 10.7 (10.6;10.9)    | 618       | <0.001  | 0.40        |
| Infrequent user                 | 10.8 (10.7;10.9)    | 871       | 11.2 (11.1;11.3)    | 885       | <0.001  | 0.22        |
| Matched ID                      | 10.4 (10.3;10.6)    | 420       | 11.3 (11.1;11.5)    | 420       | <0.001  | 0.49        |
| Unmatched ID                    | 10.5 (10.3;10.6)    | 1,118     | 11.0 (10.9;11.1)    | 1,052     | <0.001  | 0.31        |

$T_0$ =baseline survey,  $T_1$ =follow-up survey

Frequent user=places a catheter a few times a month or more often,

Infrequent user=places a catheter a few times a year or less often

We used the sub-sample of matched participants to examine the effect of training on the change in knowledge score over time. Among all matched respondents, 102 (25.3%) indicated having participated in *both* theoretical and practical training; 130 (32.2%) respondents had participated in *either* theoretical or practical training and 172 (42.6%) respondents had participated in *no* training. Results from the mixed analysis of variance showed that there was no significant interaction effect between time and training ( $F_{2,401} = 1.05$ ,  $p = 0.35$ ). In other words, knowledge scores between participants with practical and/or theoretical training did not change differently over time as compared to participants without training.

## Perception of practices and culture

The mean scale score for perception of current practices and culture increased significantly within the overall sample and within all subgroups between the two time points ( $p < 0.001$ ). Mean scale scores also increased for both matched and unmatched participants to a similar extent (table 3). Generally, agreement to the statements was moderate at baseline and strengthened over time. Yet, agreement remained moderately strong, with no group reaching a mean scale score above 6 even after implementation of the intervention bundle. Mean scores for each item are provided in appendix 3.

**Table 3. Perception: mean scale score**

|                                 | Mean $T_0$ (95% CI) | $n_{T_0}$ | Mean $T_1$ (95% CI) | $n_{T_1}$ | p-value | Effect size |
|---------------------------------|---------------------|-----------|---------------------|-----------|---------|-------------|
| Overall sample                  | 5.3 (5.3; 5.3)      | 1,568     | 5.5 (5.5; 5.6)      | 1,521     | <0.001  | 0.31        |
| Professional group              |                     |           |                     |           |         |             |
| Nurses                          | 5.4 (5.3; 5.4)      | 1,044     | 5.6 (5.6; 5.7)      | 1,082     | <0.001  | 0.33        |
| Physicians                      | 5.1 (5.0; 5.1)      | 347       | 5.3 (5.2; 5.4)      | 286       | <0.001  | 0.29        |
| Managerial function             |                     |           |                     |           |         |             |
| With                            | 5.2 (5.1; 5.3)      | 230       | 5.6 (5.5; 5.7)      | 191       | <0.001  | 0.52        |
| Without                         | 5.3 (5.3; 5.4)      | 1,180     | 5.6 (5.5; 5.6)      | 1,197     | <0.001  | 0.29        |
| Frequency of catheter placement |                     |           |                     |           |         |             |
| Frequent user                   | 5.2 (5.1; 5.3)      | 690       | 5.4 (5.3; 5.5)      | 618       | <0.001  | 0.22        |
| Infrequent user                 | 5.4 (5.3; 5.4)      | 861       | 5.7 (5.6; 5.7)      | 880       | <0.001  | 0.37        |
| Matched ID                      | 5.4 (5.3; 5.4)      | 416       | 5.6 (5.5; 5.7)      | 416       | <0.001  | 0.32        |
| Unmatched ID                    | 5.3 (5.2; 5.3)      | 1,108     | 5.5 (5.5; 5.6)      | 1,049     | <0.001  | 0.31        |

Note: Scale consisted of 13 items.

Items were answered on a scale from 1 (strongly disagree) to 7 (strongly agree).

Cronbach's alpha for the scale:  $T_0$   $\alpha=0.79$  and  $T_1$   $\alpha=0.80$

$T_0$ =baseline survey,  $T_1$ =follow-up survey

Frequent user=places a catheter a few times a month or more often,

Infrequent user=places a catheter a few times a year or less often

## Responsibilities

Self-reported responsibilities concerning IUC management by nurses and physicians changed only slightly over time (figure 1). At baseline and at follow-up, nurses felt mainly responsible for placing, maintaining and removing an IUC. However, at  $T_1$ , fewer nurses felt responsible for prescribing catheter placement ( $p < 0.001$ ) as compared to  $T_0$  and a higher percentage felt responsible for assessing the need for continued catheterization ( $p=0.002$ ). Physicians perceived themselves to be mainly responsible for prescribing catheter placement and removal at both time points. At  $T_1$ , fewer of them felt responsible for placing or assisting with placing an IUC as compared to  $T_0$ , but differences were not statistically significant.

## Determinants of behavior

The mean score for the scale assessing the determinants of behavior increased significantly between baseline and follow-up ( $p < 0.001$ ). Positive changes in mean scores were observed for all three constructs (attitudes, subjective norms and perceived behavioral control). They were particularly strong for items assessing perceived social expectations to use catheters restrictively. The positive trends could be observed for professional group, managerial function and frequency of catheter placement. There was no notable difference between the results for matched and unmatched participants. Medium effect sizes indicate practical relevance of these changes. Table 4 shows results for all groups. Mean scores for each item are provided in appendix 4.

**Table 4. Determinants of behavior: mean scale score**

|                                 | Mean $T_0$ (95% CI) | $n_{T_0}$ | Mean $T_1$ (95% CI) | $n_{T_1}$ | p-value | Effect size |
|---------------------------------|---------------------|-----------|---------------------|-----------|---------|-------------|
| Overall sample                  | 5.3 (5.3; 5.3)      | 1,539     | 5.6 (5.6; 5.6)      | 1,502     | <0.001  | 0.43        |
| Professional group              |                     |           |                     |           |         |             |
| Nurses                          | 5.3 (5.2; 5.3)      | 1,046     | 5.6 (5.6; 5.7)      | 1,083     | <0.001  | 0.56        |
| Physicians                      | 5.4 (5.3; 5.5)      | 349       | 5.6 (5.5; 5.6)      | 287       | 0.005   | 0.23        |
| Managerial function             |                     |           |                     |           |         |             |
| With                            | 5.6 (5.5; 5.7)      | 230       | 5.8 (5.7; 5.9)      | 192       | <0.001  | 0.38        |
| Without                         | 5.2 (5.2; 5.3)      | 1,184     | 5.6 (5.5; 5.6)      | 1,198     | <0.001  | 0.50        |
| Frequency of catheter placement |                     |           |                     |           |         |             |
| Frequent user                   | 5.2 (5.2; 5.3)      | 675       | 5.6 (5.5; 5.6)      | 615       | <0.001  | 0.46        |
| Infrequent user                 | 5.3 (5.3; 5.4)      | 847       | 5.6 (5.6; 5.7)      | 884       | <0.001  | 0.41        |
| Matched ID                      | 5.3 (5.3; 5.4)      | 405       | 5.7 (5.6; 5.8)      | 405       | <0.001  | 0.58        |
| Unmatched ID                    | 5.3 (5.3; 5.3)      | 1,090     | 5.6 (5.5; 5.6)      | 1,038     | <0.001  | 0.37        |

Note: Scale consisted of 15 items.

Items were answered on a scale from 1 (strongly disagree) to 7 (strongly agree).

Cronbach's alpha for scale:  $T_0$   $\alpha=0.72$  and  $T_1$   $\alpha=0.74$

$T_0$ =baseline survey,  $T_1$ =follow-up survey

Frequent user=places a catheter a few times a month or more often,

Infrequent user=places a catheter a few times a year or less often

## DISCUSSION

With this before and after survey study, we analyzed how staff knowledge, perceptions and attitudes regarding IUC use changed following the implementation of a multimodal intervention bundle in seven hospitals.

Knowledge scores increased significantly between baseline and follow-up, indicating that staff members in our pilot hospitals had more factual knowledge about the use and potential harm of urinary catheters after the intervention. We saw the most substantial changes over time in nursing

1  
2  
3  
4 staff and in staff without managerial function and staff frequently placing catheters. It is conceivable  
5 that trainings offered were specifically targeted at staff members frequently in charge of  
6 catheterization in daily practice. However, their knowledge scores at follow-up remained lower than  
7 those of physicians, staff with managerial function and staff rarely placing catheters. Pilot hospitals  
8 were required to provide theoretical trainings to all staff members working on the pilot units and  
9 offer practical training on a voluntary basis. Local project teams received templates for training  
10 materials from the program team, but they were free to design and organize the trainings according  
11 to their local structure and processes. Our survey results show that by no means all staff members  
12 from the target population attended a training session. Informal feedback received from local  
13 project leaders suggests that substantial effort was required to organize trainings. Interestingly, we  
14 could not verify that participating in education and training sessions contributed to knowledge  
15 increases in our sub-sample of matched participants. Although staff training is usually included as  
16 a core component in QI projects,[38] it is difficult to determine its influence on the overall effect  
17 when implemented as part of a multi-modal bundle. Our results show that resource-intensive  
18 education sessions need not be the only way to convey knowledge and awareness about safety  
19 issues and good practices. Other measures such as implementing new policies, using unit-level  
20 champions to model safety behaviors, or promoting bedside teaching may be alternative avenues.  
21 Training sessions do, however, offer a platform for hospitals to disseminate norms and  
22 expectations, especially if they are used by leaders to demonstrate their commitment to the cause.

23  
24  
25  
26  
27  
28  
29  
30  
31  
32  
33  
34  
35 Urinary catheter management is a strongly interprofessional topic and it is therefore essential that  
36 roles and responsibilities are clear for all of the involved health care workers. In a previous study  
37 with data from the baseline survey, we analyzed how nurses and physicians perceived their  
38 respective responsibilities for IUC management [39]. We found that physicians felt mainly  
39 responsible for prescribing catheter placement and removal, while nurses generally considered  
40 themselves responsible for placing, managing and removing them. However, both nurses and  
41 physicians felt equally responsible for assessing the need for continued catheterization. The results  
42 from the present study show that at the end of the intervention, the perceived division of tasks  
43 between the two groups remained largely the same. However, this does not necessarily indicate  
44 that tasks especially in regard to the re-evaluation of the need for a catheter were not clarified over  
45 the course of the project. Rather, it is conceivable that because of the intervention bundle, both  
46 groups were encouraged to assume responsibility in this area.

47  
48  
49  
50  
51  
52  
53  
54  
55 Examining respondents' perception of current practices and cultural factors within their  
56 organization, we found a small, but significant effect at the end of the intervention. The moderate  
57 effect size suggests that staff members indeed perceived positive changes in IUC management  
58 and safety climate within their organization. We also found that factors determining intentions to  
59  
60

1  
2  
3  
4 perform a certain behavior, namely personal attitudes, perceived behavioral control and subjective  
5 norms changed over the course of the project. At follow-up, staff members generally expressed  
6 higher willingness to contribute to a safe and restrictive use of IUCs. In particular, participants felt  
7 higher expectations from their social environment to reduce catheters, suggesting that a change in  
8 culture could indeed be initiated. Wakefield and colleagues found that perceptions about the  
9 behavior of professional peers, and the personal belief that engaging in a certain behavior will lead  
10 to better safety outcomes, are the strongest factors influencing safety behavior. The authors  
11 conclude that interventions too often rely on educational measures in order to change behavior  
12 and argue that using behavioral models to design interventions may be more effective [15]. Our  
13 results seem to confirm this.  
14  
15  
16  
17  
18  
19

20  
21 Even though there was a clear positive trend, average agreement for both scales remained  
22 moderately strong at follow-up. Recommended practices and socio-adaptive components were  
23 thus, from the perspective of participants, not fully established in the institutions even after the  
24 intervention. This highlights the importance of continued efforts to incorporate recommended  
25 practices into routine care even after completion of the actual project phase. With high staff  
26 turnover rates in the hospitals, it seems particularly important to ensure that new staff members  
27 learn about and understand the policies, practices and expectations regarding IUC use in the  
28 hospitals.  
29  
30  
31  
32  
33

34  
35 Almost all of the respondents generated an 8-digit code. Interestingly, however, only 28% of the  
36 IDs provided could be matched between the two surveys. Participants at follow-up were thus, for  
37 the most part, not the same individuals than at baseline. This may be due to high staff turnover  
38 rates during the intervention period and could mean that many new employees, who had not been  
39 working at the hospital at the time of the baseline survey, participated in the follow-up survey.  
40 However, it is also conceivable that unmatched participants had been working at the hospital  
41 throughout the intervention, but had been unwilling or unable to participate in the same survey  
42 twice. We found that in all of the thematic sections, the scores for unmatched participants  
43 increased to the same extent than for matched participants. This suggests results obtained on the  
44 group level quite closely represent results on the individual participant level.  
45  
46  
47  
48  
49  
50

### 51 **Limitations**

52  
53 This study has several limitations. A control group was not included in the study design for practical  
54 purposes. The single-group design does therefore not allow any causal inferences about the  
55 contribution of the intervention bundle on the observed effects. It is possible that other trends or  
56 measures within the hospitals may have affected the outcomes. Furthermore, the study design  
57 does not allow us to evaluate sustainability of the intervention over time. Another follow-up survey  
58  
59  
60



1  
2  
3  
4 could shed more light on the long-term effects in the hospitals. Since data collection was organized  
5 by local project teams, we have no information on non-participants. It is possible that only highly  
6 motivated staff members participated in the survey, which may result in more positive responses.  
7  
8 The two survey samples were comparable with respect to participants per hospital. For some of  
9 the socio-demographic characteristics, notably profession and work unit, we found significant  
10 differences between the two time periods. However, since the results for the matched participants  
11 were comparable to the overall sample, it can be assumed that sample composition did not  
12 influence the overall results.  
13  
14  
15  
16

## 17 **Conclusion**

18  
19  
20 Changing staff attitudes, knowledge and behavior are important prerequisites for an effective  
21 reduction of catheter use and catheter-associated complications. We found that staff members had  
22 better knowledge of catheter-associated risks, a more positive perception of current practices and  
23 cultural factors within their organization and stronger beliefs and attitudes towards restrictive  
24 urinary catheter use after the implementation of a multi-modal intervention bundle. The positive  
25 trends were present in all subgroups, indicating that regardless of responsibilities and practice of  
26 catheter placement, perspectives on urinary catheter use changed over time. Efforts now need to  
27 be targeted at sustaining these changes, so that restrictive use of IUCs becomes an integral part of  
28 the hospital culture.  
29  
30  
31  
32  
33

34  
35 **Author contributions:** AN, SZ, JM, AS and DS contributed to the design of the study and the  
36 survey instrument, SK und GF contributed to the data collection. AN and DS analyzed the data. AN  
37 and SZ drafted the manuscript, JM, AS, SK, GJ and DS critically revised the manuscript for  
38 important intellectual content. All authors approved the manuscript.  
39  
40  
41

42 **Funding:** This work was supported by a grant from the Swiss Federal Office of Public Health [no.  
43 15.011083].  
44  
45

46 **Competing interests:** All authors report no conflicts of interest relevant to this article.  
47  
48

49 **Data sharing statement:** No additional data are available.  
50  
51  
52  
53  
54  
55  
56  
57  
58  
59  
60

## Figure legends

### Figure 1. Self-reported responsibilities in regard to urinary catheters by profession

\* Change between time periods significant on  $p < 0.05$ .

## Appendices

Appendix 1. List of indications for indwelling urinary catheters

Appendix 2. Knowledge: % correct answers provided per item at T0 and T1

Appendix 3. Perception: mean and standard deviation per item at T0 and T1

Appendix 4. Behavior: mean and standard deviation per item at T0 and T1

For peer review only

**REFERENCES**

1. Jansen IA V, Hopmans TEM, Wille JC, Van Den Broek PJ, Van Der Kooi TII, Van Benthem BHB. Appropriate use of indwelling urethra catheters in hospitalized patients: Results of a multicentre prevalence study. *BMC Urol*. 2012;12:2–7.
2. Munasinghe R, Yazdani H, Siddique M, Hafeez W. Appropriateness of use of indwelling urinary catheters in patients admitted to the medical service. *Infect Control Hosp Epidemiol*. 2001;22:647–9.
3. Saint S. Clinical and economic consequences of nosocomial catheter- related bacteriuria. *Am J Infect Control*. 2000;28:68–75.
4. Nicolle LE. Catheter associated urinary tract infections. *Antimicrob Resist Infect Control*. 2014;3:1–8.
5. Hollingsworth JM, Rogers MAM, Krein SL, Hickner A, Kuhn L, Cheng A, et al. Determining the noninfectious complications of indwelling urethral catheters: a systematic review and meta-analysis. *Ann Intern Med*. 2013 Sep;159:401–10.
6. Lo E, Nicolle L, Classen D, Arias KM, Podgorny K, Anderson DJ, et al. Strategies to Prevent Catheter-Associated Urinary Tract Infections in Acute Care Hospitals. *Infect Control Hosp Epidemiol*. 2008;29:S41–50.
7. Gould C V., Umscheid CA, Agarwal RK, Kuntz G, Pegues DA. Guideline for Prevention of Catheter-Associated Urinary Tract Infections 2009. *Infect Control Hosp Epidemiol*. 2010;31:319–26.
8. Saint S, Olmsted RN, Fakh MG, Kowalski CP, Watson SR, Sales AE, et al. Translating health care-associated urinary tract infection prevention research into practice via the bladder bundle. *Jt Comm J Qual Patient Saf*. 2009;35:449–55.
9. Fakh MG, George C, Edson BS, Goeschel CA, Saint S. Implementing a National Program to Reduce Catheter-Associated Urinary Tract Infection: A Quality Improvement Collaboration of State Hospital Associations, Academic Medical Centers, Professional Societies, and Governmental Agencies. *Infect Control Hosp Epidemiol*. 2013;34:1048–54.
10. Janzen J, Buurman BM, Spanjaard L, De Reijke TM, Goossens A, Geerlings SE. Reduction of unnecessary use of indwelling urinary catheters. *BMJ Qual Saf*. 2013;22:984–8.
11. Saint S, Greene MT, Krein SL, Rogers MAM, Ratz D, Fowler KE, et al. A Program to

- 1  
2  
3  
4 Prevent Catheter-Associated Urinary Tract Infection in Acute Care. *N Engl J Med*.  
5 2016;374:2111–9.  
6  
7  
8  
9 12. Meddings J, Rogers MAM, Krein SL, Fakhri MG, Olmsted RN, Saint S. Reducing  
10 unnecessary urinary catheter use and other strategies to prevent catheter-associated  
11 urinary tract infection: An integrative review. *BMJ Qual Saf*. 2014;23:277–89.  
12  
13  
14 13. Saint S, Howell JD, Krein SL. Implementation science: how to jump-start infection  
15 prevention. *Infect Control Hosp Epidemiol*. 2010 Nov;31 Suppl 1:S14-7.  
16  
17  
18 14. Weaver SJ, Lubomksi LH, Wilson RF, Pfoh ER, Martinez KA, Dy SM. Promoting a culture of  
19 safety as a patient safety strategy: A systematic review. *Ann Intern Med*. 2013;158:369–74.  
20  
21  
22 15. Wakefield JG, McLaws M-L, Whitby M, Patton L. Patient safety culture: factors that influence  
23 clinician involvement in patient safety behaviours. *BMJ Qual Saf*. 2010;19:585–91.  
24  
25  
26 16. Meddings J, Reichert H, Todd Greene M, Safdar N, Krein SL, Olmsted RN, et al. Evaluation  
27 of the association between Hospital Survey on Patient Safety Culture (HSOPS) measures  
28 and catheter-associated infections: Results of two national collaboratives. *BMJ Qual Saf*.  
29 2017;26:226–35.  
30  
31  
32  
33 17. Smith SN, Greene MT, Mody L, Banaszak-Holl J, Petersen LD, Meddings J. Evaluation of  
34 the association between Nursing Home Survey on Patient Safety culture (NHSOPS)  
35 measures and catheter-associated urinary tract infections: results of a national collaborative.  
36 *BMJ Qual Saf*. 2017;bmjqs-2017-006610.  
37  
38  
39  
40 18. Paras ML, Shenoy ES, Hsu HE, Walensky RP, Hooper DC. Housestaff Knowledge Related  
41 to Urinary Catheter Use and Catheter-Associated Urinary Tract Infections. *Infect Control  
42 Hosp Epidemiol*. 2015 Nov;36:1355–7.  
43  
44  
45  
46 19. Jain M, Dogra V, Mishra B, Thakur A, Loomba P. Knowledge and attitude of doctors and  
47 nurses regarding indication for catheterization and prevention of catheter-associated urinary  
48 tract infection in a tertiary care hospital. *Indian J Crit Care Med*. 2015;19:76.  
49  
50  
51  
52 20. Viswanathan K, Rosen T, Mulcare MR, Clark S, Hayes J, Lachs MS, et al. Emergency  
53 Department Placement and Management of Indwelling Urinary Catheters in Older Adults:  
54 Knowledge, Attitudes, and Practice. *J Emerg Nurs*. 2015;41:414–22.  
55  
56  
57 21. Drekonja DM, Kuskowski MA, Johnson JR. Foley catheter practices and knowledge among  
58 Minnesota physicians. *Am J Infect Control*. 2010;38:694–700.  
59  
60

- 1
- 2
- 3
- 4 22. Drekonja DM, Kuskowski MA, Johnson JR. Internet survey of Foley catheter practices and
- 5 knowledge among Minnesota nurses. *Am J Infect Control*. 2010;38:31–7.
- 6
- 7
- 8 23. Mizerek E, Wolf L. To Foley or Not To Foley: Emergency Nurses' Perceptions of Clinical
- 9 Decision Making in the Use of Urinary Catheters in the Emergency Department. *J Emerg*
- 10 *Nurs*. 2015;41:329–34.
- 11
- 12
- 13 24. Marigliano A, Barbadoro P, Pennacchietti L, D'Errico MM, Prospero E. Active training and
- 14 surveillance: 2 good friends to reduce urinary catheterization rate. *Am J Infect Control*.
- 15 2012;40:692–5.
- 16
- 17
- 18 25. Gray D, Nussle R, Cruz A, Kane G, Toomey M, Bay C, et al. Effects of a catheter-
- 19 associated urinary tract infection prevention campaign on infection rate, catheter utilization,
- 20 and health care workers' perspective at a community safety net hospital. *Am J Infect*
- 21 *Control*. 2016;44:115–6.
- 22
- 23
- 24
- 25
- 26 26. Fakh MG, Rey JE, Pena ME, Szpunar S, Saravolatz LD. Sustained reductions in urinary
- 27 catheter use over 5 years: Bedside nurses view themselves responsible for evaluation of
- 28 catheter necessity. *Am J Infect Control*. 2013;41:236–9.
- 29
- 30
- 31
- 32 27. Riad-Allen L, Dermody SS, Herman Y, Bellissimo K, Selby P, George TP. Becoming
- 33 tobacco-free: Changes in staff and patient attitudes and incident reports in a large academic
- 34 mental health and addictions hospital. *Am J Addict*. 2017 Mar;26:183–91.
- 35
- 36
- 37 28. Mitchell BG, White N, Farrington A, Allen M, Page K, Gardner A, et al. Changes in
- 38 knowledge and attitudes of hospital environmental services staff: The Researching Effective
- 39 Approaches to Cleaning in Hospitals (REACH) study. *Am J Infect Control*. 2018;0–5.
- 40
- 41
- 42
- 43 29. Laur C V., Keller HH, Curtis L, Douglas P, Murphy J, Ray S. Comparing Hospital Staff
- 44 Nutrition Knowledge, Attitudes, and Practices Before and 1 Year After Improving Nutrition
- 45 Care: Results From the More-2-Eat Implementation Project. *J Parenter Enter Nutr*.
- 46 2017;42:014860711771849.
- 47
- 48
- 49
- 50 30. Yurek LA, Vasey J, Havens DS. The Use of Self-Generated Longitudinal Research. *Eval*
- 51 *Rev*. 2010;435–52.
- 52
- 53
- 54 31. Züllig S, Mascherek A. Sicherheit bei Blasenkathetern. Empfehlungen im Rahmen des
- 55 nationalen Pilotprogramms progress! Sicherheit bei Blasenkathetern. Zürich: Stiftung für
- 56 Patientensicherheit; 2016.
- 57
- 58
- 59
- 60

- 1
- 2
- 3
- 4 32. Mascherek AC, Schwappach DLB, Bezzola P. Frequency of use and knowledge of the
- 5 WHO-surgical checklist in Swiss hospitals: A cross-sectional online survey. *Patient Saf*
- 6 *Surg.* 2013;7:1–7.
- 7
- 8
- 9
- 10 33. Mascherek AC, Gehring K, Bezzola P, Schwappach DLB. Using the theory of planned
- 11 behaviour to model antecedents of surgical checklist use: a cross-sectional study. *BMC*
- 12 *Health Serv Res.* 2015;15:462.
- 13
- 14
- 15 34. Ajzen I. The theory of planned behavior. *Organ Behav Hum Decis Process.* 1991;50:179–
- 16 211.
- 17
- 18
- 19 35. Ajzen I, Manstead ASR. Changing health-related behaviours: An approach based on the
- 20 Theory of Planned Behaviour. In: Hewstone M, Schut H, de Wit J, Van Den Bos K, Stroebe
- 21 M, editors. *The scope of social psychology: Theory and applications.* New York: Psychology
- 22 Press; 2007. p. 43–63.
- 23
- 24
- 25
- 26 36. Dunlap WP, Cortina JM, Vaslow JB, Burke MJ. Meta-analysis of experiments with matched
- 27 groups or repeated measures designs. *Psychol Methods.* 1996;1:170–7.
- 28
- 29
- 30 37. Bortz J, Döring N. *Forschungsmethoden und Evaluation für Human- und*
- 31 *Sozialwissenschaftler.* 4th ed. Heidelberg: Springer Medizin Verlag; 2006.
- 32
- 33
- 34 38. Storr J, Twyman A, Zingg W, Damani N, Kilpatrick C, Reilly J, et al. Core components for
- 35 effective infection prevention and control programmes: New WHO evidence-based
- 36 recommendations. *Antimicrob Resist Infect Control.* 2017;6.
- 37
- 38
- 39
- 40 39. Niederhauser A, Züllig S, Marschall J, Schwappach DLB, Progress! C group. Nurses' and
- 41 Physicians' Perceptions of Indwelling Urinary Catheter Practices and Culture in Their
- 42 Institutions. *J Patient Saf.* 2018;00:1–8.
- 43
- 44
- 45
- 46
- 47
- 48
- 49
- 50
- 51
- 52
- 53
- 54
- 55
- 56
- 57
- 58
- 59
- 60

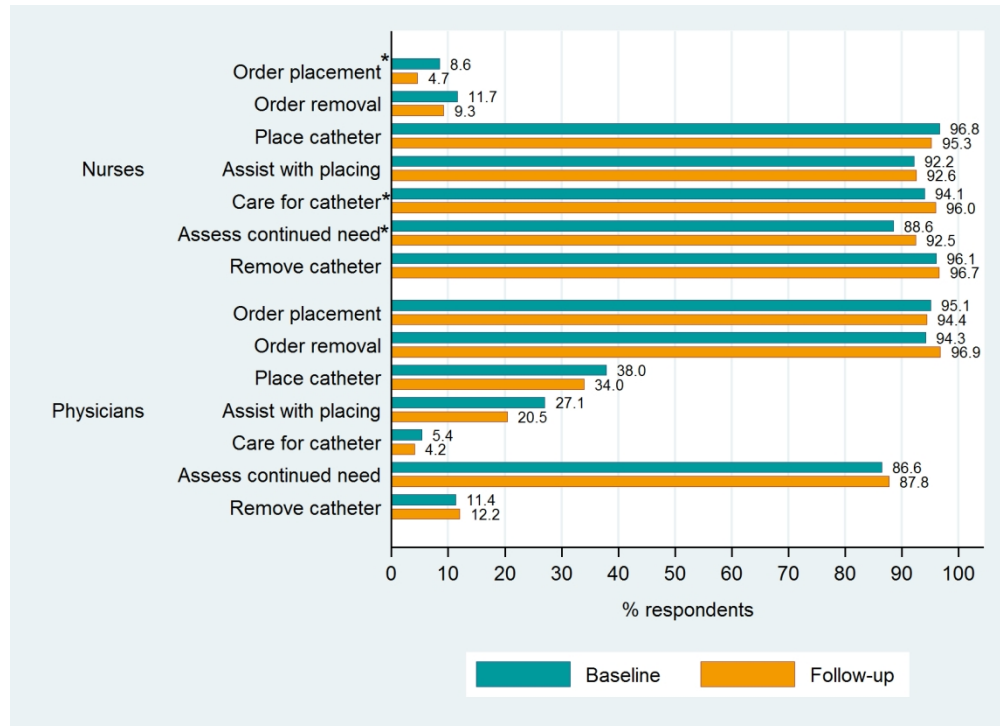

Figure 1. Self-reported responsibilities in regard to urinary catheters by profession

152x110mm (300 x 300 DPI)

## Appendix 1. List of indications for indwelling urinary catheters

Note: This list does not cover urological emergencies. Treatment for these cases is decided by the urologist.

No indications for a urinary catheter are:

Asymptomatic chronic urinary retention

Urine output monitoring / fluid monitoring for stable patients, if daily weight control is possible

Need for intensive care

Urinary incontinence

Immobilization, as long as alternative methods<sup>1</sup> for controlled bladder drainage have not been exhausted

Comfort from the perspective of the patient (or their trusted representative) OR from the perspective of staff

| Indication                        | Specification                                                                                                                                                                                                                                                                               |
|-----------------------------------|---------------------------------------------------------------------------------------------------------------------------------------------------------------------------------------------------------------------------------------------------------------------------------------------|
| Urinary retention                 | Acute urinary retention of any origin<br>Symptomatic chronic outflow obstruction PLUS >300 ml residual urine                                                                                                                                                                                |
| Urine output monitoring           | In regular, short intervals (hourly or as defined by hospital) PLUS direct therapeutic consequences from monitoring, if body weight of patient cannot be measured                                                                                                                           |
| Surgery                           | Long surgery (>4h)<br>Perioperative: for surgical reasons, if bladder has to be empty. Catheter is to be removed at the end of the surgery<br>Urogenital surgery and/or pelvic floor surgery<br>Epidural / peridural anesthesia/analgesia                                                   |
| Pressure ulcers PLUS incontinence | Pressure ulcers stage III or IV, or sacral/perineal skin transplants PLUS incontinence, if alternative methods <sup>1</sup> for controlled bladder drainage failed                                                                                                                          |
| Prolonged immobilization          | Immobilization for medical reasons, especially for pain reduction, if alternative methods <sup>1</sup> for controlled bladder drainage failed                                                                                                                                               |
| Palliation PLUS Comfort           | Terminal-palliative situation PLUS dysfunction of bladder PLUS/OR difficulties with normal voiding, if alternative methods <sup>1</sup> for controlled bladder drainage failed<br>Severe psychological strain PLUS at the request of the informed patient (or their trusted representative) |

<sup>1</sup> Alternative methods are: condom catheter, urinal, bedpan, bedside commode, incontinence pads, pants

List was translated for this publication by the authors.



## Appendix 2. Knowledge – % correct answers provided per item

|                                                                                                                                                                                       | % T <sub>0</sub><br>n = 1,579 | % T <sub>1</sub><br>n = 1,527 |
|---------------------------------------------------------------------------------------------------------------------------------------------------------------------------------------|-------------------------------|-------------------------------|
| <b>Please estimate:</b>                                                                                                                                                               |                               |                               |
| How many patients in Switzerland receive a catheter during their hospital stay? (10-25%)                                                                                              | 37.6                          | 39.1                          |
| <b>Please indicate if the following statements are correct:</b>                                                                                                                       |                               |                               |
| After 30 catheter-days, nearly all patients show bacteriuria. (correct)                                                                                                               | 81.6                          | 86.9                          |
| The duration of catheterization is an important risk factor for the development of a urinary tract infection. (correct)                                                               | 98.0                          | 98.9                          |
| Most hospital-acquired urinary tract infections are associated with a urinary catheter. (correct)                                                                                     | 82.2                          | 86.3                          |
| Single-use urinary catheters carry a higher risk for infections as compared to indwelling catheters. (false)                                                                          | 89.9                          | 91.9                          |
| A closed drainage system is essential for the prevention of catheter-associated urinary tract infections. (correct)                                                                   | 77.4                          | 82.0                          |
| Compared to catheters, non-invasive methods for bladder draining (e.g., condom catheters, incontinence pads) have the advantage that they do not carry a risk for injuries. (correct) | 62.4                          | 69.0                          |
| Non-infectious complications (e.g., injuries or allergic reactions) only occur in absolutely rare instances during catheterization. (false)                                           | 61.2                          | 68.8                          |
| The choice of an antiseptic for disinfecting the urethral meatus does not affect the correct asepsis when inserting a catheter. (false)                                               | 80.6                          | 82.6                          |
| Up to 50 percent of catheters placed in an emergency department are not medically justified. (correct)                                                                                | 61.4                          | 73.8                          |
| One effective measure to prevent catheter-associated urinary tract infections is to change catheters or drainage bags in regular intervals. (false)                                   | 30.4                          | 36.2                          |
| <b>In which of these situations is the placement of a urinary catheter indicated?</b>                                                                                                 |                               |                               |
| To monitor urine output in stable patients who can be weighed. (not indicated)                                                                                                        | 97.5                          | 98.1                          |
| In case of distress at the request of a terminally ill patient. (indicated)                                                                                                           | 93.3                          | 93.2                          |
| For patients requiring intensive care. (not indicated)                                                                                                                                | 21.2                          | 32.3                          |
| For patients with restricted mobility. (not indicated)                                                                                                                                | 79.9                          | 81.4                          |

Correct answers for knowledge items are provided in parentheses. Items were translated for this publication by the authors. Sample size differs slightly for each item due to a varying number of missing values.

### Appendix 3. Perception of practices and culture – Mean and standard deviation per item

|                                                                                                                      | Mean T <sub>0</sub><br>(SD)<br>n = 1,579 | Mean T <sub>1</sub><br>(SD)<br>n = 1,527 |
|----------------------------------------------------------------------------------------------------------------------|------------------------------------------|------------------------------------------|
| On my unit, IUCs are placed only as clearly indicated medical measure.                                               | 5.5 (1.4)                                | 5.7 (1.3)                                |
| Nursing workload plays an important role when a decision for placing an IUC is made.                                 | 2.8 (1.8)                                | 2.5 (1.6)                                |
| Whenever possible, staff on my unit tries to use alternatives to an IUC (e.g., condom catheters, incontinence pads). | 4.7 (1.8)                                | 5.1 (1.7)                                |
| The daily assessment to evaluate if an IUC is still needed is a given for us.                                        | 5.3 (1.6)                                | 5.6 (1.5)                                |
| People in charge on my unit make sure that everyone placing IUCs is sufficiently trained for this task.              | 5.4 (1.7)                                | 5.6 (1.5)                                |
| Basic infection prevention measures are well complied with during placement and care of IUCs.                        | 6.0 (1.1)                                | 6.1 (1.0)                                |
| If someone needs help when placing an IUC, it is clear on my unit who can be contacted.                              | 5.8 (1.5)                                | 5.9 (1.4)                                |
| It is common on my unit that, whenever possible, two healthcare workers work together to place a catheter.           | 5.0 (1.9)                                | 5.2 (1.7)                                |
| For medical leadership on my unit, restrictive use of IUCs is very important.                                        | 5.1 (1.6)                                | 5.4 (1.4)                                |
| For nursing leadership on my unit, restrictive use of IUCs is very important.                                        | 5.1 (1.5)                                | 5.7 (1.3)                                |
| Medical and nursing staff on my unit have a similar attitude concerning the use of IUCs.                             | 5.1 (1.4)                                | 5.3 (1.4)                                |
| For staff members on my unit, it is a matter of course to openly question the placement of an IUC.                   | 5.5 (1.4)                                | 5.7 (1.2)                                |
| It is difficult on my unit to speak up when rules of hygiene are broken during placement and care of an IUC.         | 2.9 (1.7)                                | 2.8 (1.6)                                |

Items were translated for this publication by the authors. Sample size differs slightly for each item due to a varying number of missing values.

#### Appendix 4. Determinants of personal behavior – Mean and standard deviation per item

|                                                                                             | Mean T <sub>0</sub><br>(SD)<br>n = 1,579 | Mean T <sub>1</sub><br>(SD)<br>n = 1,527 |
|---------------------------------------------------------------------------------------------|------------------------------------------|------------------------------------------|
| <b>Perceived behavioral control</b>                                                         |                                          |                                          |
| I can properly estimate in which situations the use of an IUC is appropriate.               | 6.1 (1.0)                                | 6.1 (1.0)                                |
| I can influence the use of IUCs in my daily work.                                           | 5.5 (1.4)                                | 5.7 (1.4)                                |
| I am convinced that I am proficient in caring for an indwelling catheter.                   | 5.5 (1.6)                                | 5.6 (1.6)                                |
| I am convinced that I am proficient in inserting a urinary catheter.                        | 5.7 (1.5)                                | 5.7 (1.4)                                |
| I am confident that I can reduce the use of IUCs in everyday work.                          | 5.0 (1.5)                                | 5.5 (1.4)                                |
| <b>Subjective Norms</b>                                                                     |                                          |                                          |
| My colleagues appreciate my commitment to reduce the use of IUCs.                           | 5.1 (1.5)                                | 5.4 (1.4)                                |
| In my hospital I am expected to contribute to the reduction of IUCs.                        | 4.6 (1.8)                                | 5.7 (1.5)                                |
| Our patients appreciate it when IUCs are avoided.                                           | 5.5 (1.4)                                | 5.6 (1.4)                                |
| My supervisors expect that everyone follows the internal protocols for inserting catheters. | 6.0 (1.2)                                | 6.1 (1.2)                                |
| My supervisors expect me to reduce the use of IUCs.                                         | 4.5 (1.7)                                | 5.5 (1.5)                                |
| <b>Attitudes</b>                                                                            |                                          |                                          |
| The risk from IUCs for patients is underestimated.                                          | 5.1 (1.6)                                | 5.0 (1.8)                                |
| I find it difficult in my daily work to reduce the use of IUCs.                             | 3.7 (1.7)                                | 3.3 (1.6)                                |
| I am convinced that by reducing the use of IUCs, adverse events to patients can be avoided. | 5.8 (1.3)                                | 6.1 (1.1)                                |
| A reduced use of IUCs makes patient care more stressful for me.                             | 3.0 (1.8)                                | 2.9 (1.7)                                |
| I think that it's important to reduce the use of IUCs in the hospital.                      | 5.7 (1.3)                                | 6.0 (1.2)                                |

Items were translated for this publication by the authors. Items are presented according to their construct (perceived behavioral control, subjective norm and attitudes). In the questionnaire, order of the items was randomized. Sample size differs slightly for each item due to a varying number of missing values.

**STROBE 2007 (v4) Statement—Checklist of items that should be included in reports of *cross-sectional studies***

| Section/Topic                | Item # | Recommendation                                                                                                                                                                       | Reported on page # |
|------------------------------|--------|--------------------------------------------------------------------------------------------------------------------------------------------------------------------------------------|--------------------|
| Title and abstract           | 1      | (a) Indicate the study's design with a commonly used term in the title or the abstract                                                                                               | title page         |
|                              |        | (b) Provide in the abstract an informative and balanced summary of what was done and what was found                                                                                  | p.2                |
| <b>Introduction</b>          |        |                                                                                                                                                                                      |                    |
| Background/rationale         | 2      | Explain the scientific background and rationale for the investigation being reported                                                                                                 | p.3-4              |
| Objectives                   | 3      | State specific objectives, including any prespecified hypotheses                                                                                                                     | p.3-4              |
| <b>Methods</b>               |        |                                                                                                                                                                                      |                    |
| Study design                 | 4      | Present key elements of study design early in the paper                                                                                                                              | p.5                |
| Setting                      | 5      | Describe the setting, locations, and relevant dates, including periods of recruitment, exposure, follow-up, and data collection                                                      | p.4 & p.5          |
| Participants                 | 6      | (a) Give the eligibility criteria, and the sources and methods of selection of participants                                                                                          | p.5 & p.6          |
| Variables                    | 7      | Clearly define all outcomes, exposures, predictors, potential confounders, and effect modifiers. Give diagnostic criteria, if applicable                                             | p.5-6              |
| Data sources/<br>measurement | 8*     | For each variable of interest, give sources of data and details of methods of assessment (measurement). Describe comparability of assessment methods if there is more than one group | N/A                |
| Bias                         | 9      | Describe any efforts to address potential sources of bias                                                                                                                            | N/A                |
| Study size                   | 10     | Explain how the study size was arrived at                                                                                                                                            | p.6                |
| Quantitative variables       | 11     | Explain how quantitative variables were handled in the analyses. If applicable, describe which groupings were chosen and why                                                         | p.6-7              |
| Statistical methods          | 12     | (a) Describe all statistical methods, including those used to control for confounding                                                                                                | p.6-7              |
|                              |        | (b) Describe any methods used to examine subgroups and interactions                                                                                                                  | p.6-7              |
|                              |        | (c) Explain how missing data were addressed                                                                                                                                          | p.6-7              |
|                              |        | (d) If applicable, describe analytical methods taking account of sampling strategy                                                                                                   | N/A                |
|                              |        | (e) Describe any sensitivity analyses                                                                                                                                                | N/A                |

|                          |     |                                                                                                                                                                                                              |               |
|--------------------------|-----|--------------------------------------------------------------------------------------------------------------------------------------------------------------------------------------------------------------|---------------|
| <b>Results</b>           |     |                                                                                                                                                                                                              |               |
| Participants             | 13* | (a) Report numbers of individuals at each stage of study—eg numbers potentially eligible, examined for eligibility, confirmed eligible, included in the study, completing follow-up, and analysed            | p.7           |
|                          |     | (b) Give reasons for non-participation at each stage                                                                                                                                                         | N/A           |
|                          |     | (c) Consider use of a flow diagram                                                                                                                                                                           | N/A           |
| Descriptive data         | 14* | (a) Give characteristics of study participants (eg demographic, clinical, social) and information on exposures and potential confounders                                                                     | p.8 (table 1) |
|                          |     | (b) Indicate number of participants with missing data for each variable of interest                                                                                                                          | p.8 (table 1) |
| Outcome data             | 15* | Report numbers of outcome events or summary measures                                                                                                                                                         | p.9-11        |
| Main results             | 16  | (a) Give unadjusted estimates and, if applicable, confounder-adjusted estimates and their precision (eg, 95% confidence interval). Make clear which confounders were adjusted for and why they were included | N/A           |
|                          |     | (b) Report category boundaries when continuous variables were categorized                                                                                                                                    | N/A           |
|                          |     | (c) If relevant, consider translating estimates of relative risk into absolute risk for a meaningful time period                                                                                             | N/A           |
| Other analyses           | 17  | Report other analyses done—eg analyses of subgroups and interactions, and sensitivity analyses                                                                                                               | p.9           |
| <b>Discussion</b>        |     |                                                                                                                                                                                                              |               |
| Key results              | 18  | Summarise key results with reference to study objectives                                                                                                                                                     | p.11-13       |
| Limitations              | 19  | Discuss limitations of the study, taking into account sources of potential bias or imprecision. Discuss both direction and magnitude of any potential bias                                                   | p.13-14       |
| Interpretation           | 20  | Give a cautious overall interpretation of results considering objectives, limitations, multiplicity of analyses, results from similar studies, and other relevant evidence                                   | p.14          |
| Generalisability         | 21  | Discuss the generalisability (external validity) of the study results                                                                                                                                        | p.13          |
| <b>Other information</b> |     |                                                                                                                                                                                                              |               |
| Funding                  | 22  | Give the source of funding and the role of the funders for the present study and, if applicable, for the original study on which the present article is based                                                | p14           |

\*Give information separately for cases and controls in case-control studies and, if applicable, for exposed and unexposed groups in cohort and cross-sectional studies.

**Note:** An Explanation and Elaboration article discusses each checklist item and gives methodological background and published examples of transparent reporting. The STROBE checklist is best used in conjunction with this article (freely available on the Web sites of PLoS Medicine at <http://www.plosmedicine.org/>, Annals of Internal Medicine at <http://www.annals.org/>, and Epidemiology at <http://www.epidem.com/>). Information on the STROBE Initiative is available at [www.strobe-statement.org](http://www.strobe-statement.org).

# BMJ Open

## Change in staff perspectives on indwelling urinary catheter use after implementation of an intervention bundle in seven Swiss acute care hospitals: Results of a before/after survey study

|                                 |                                                                                                                                                                                                                                                                                                                                                                                                                                                                                                                                                                                                                                                                                                                                                                                                                                                          |
|---------------------------------|----------------------------------------------------------------------------------------------------------------------------------------------------------------------------------------------------------------------------------------------------------------------------------------------------------------------------------------------------------------------------------------------------------------------------------------------------------------------------------------------------------------------------------------------------------------------------------------------------------------------------------------------------------------------------------------------------------------------------------------------------------------------------------------------------------------------------------------------------------|
| Journal:                        | <i>BMJ Open</i>                                                                                                                                                                                                                                                                                                                                                                                                                                                                                                                                                                                                                                                                                                                                                                                                                                          |
| Manuscript ID                   | bmjopen-2018-028740.R1                                                                                                                                                                                                                                                                                                                                                                                                                                                                                                                                                                                                                                                                                                                                                                                                                                   |
| Article Type:                   | Original research                                                                                                                                                                                                                                                                                                                                                                                                                                                                                                                                                                                                                                                                                                                                                                                                                                        |
| Date Submitted by the Author:   | 16-Jul-2019                                                                                                                                                                                                                                                                                                                                                                                                                                                                                                                                                                                                                                                                                                                                                                                                                                              |
| Complete List of Authors:       | Niederhauser, Andrea; Swiss Patient Safety Foundation<br>Züllig, Stephanie; Swiss Patient Safety Foundation<br>Marschall, Jonas; Swissnos National Center for Infection Control; Bern University Hospital, Department of Infectious Diseases<br>Schweiger, Alexander; Swissnos National Center for Infection Control; Basel University Hospital, Department of Infectious Diseases and Hospital Epidemiology<br>John, Gregor; Hopital neuchatelois, Department of Internal Medicine<br>Kuster, Stefan; Swissnos National Center for Infection Control; University and University Hospital Zurich, Division of Infectious Diseases and Hospital Epidemiology<br>Schwappach, David; Swiss Patient Safety Foundation; University of Bern, Institute of Social and Preventive Medicine (ISPM)<br>Safe urinary catheterization collaboration group, progress! |
| <b>Primary Subject Heading</b>: | Health services research                                                                                                                                                                                                                                                                                                                                                                                                                                                                                                                                                                                                                                                                                                                                                                                                                                 |
| Secondary Subject Heading:      | Infectious diseases                                                                                                                                                                                                                                                                                                                                                                                                                                                                                                                                                                                                                                                                                                                                                                                                                                      |
| Keywords:                       | Patient Safety, indwelling urinary catheter, survey, intervention bundle, perception                                                                                                                                                                                                                                                                                                                                                                                                                                                                                                                                                                                                                                                                                                                                                                     |
|                                 |                                                                                                                                                                                                                                                                                                                                                                                                                                                                                                                                                                                                                                                                                                                                                                                                                                                          |

SCHOLARONE™  
Manuscripts

1  
2  
3  
4 **1 Change in staff perspectives on indwelling urinary catheter use after implementation of an**  
5 **2 intervention bundle in seven Swiss acute care hospitals: Results of a before/after survey**  
6 **3 study**

7  
8 4 Running title: Change in staff perspectives

9  
10 5 Andrea Niederhauser MPH<sup>1</sup>

11 6 Stephanie Züllig PhD<sup>1</sup>

12 7 Jonas Marschall MD<sup>2,3</sup>

13 8 Alexander Schweiger MD<sup>2,4</sup>

14 9 Gregor John MD<sup>5</sup>

15 10 Stefan P Kuster MD<sup>2,6</sup>

16 11 David LB Schwappach PhD<sup>1,7</sup>

17 12 and progress! Safe urinary catheterization collaboration group

18 13  
19 14 1 Swiss Patient Safety Foundation, Zurich, Switzerland

20 15 2 Swissnos National Center for Infection Control, Bern, Switzerland

21 16 3 Department of Infectious Diseases, Bern University Hospital, Bern, Switzerland

22 17 4 Department of Infectious Diseases and Hospital Epidemiology, Basel University Hospital,  
23 18 Basel, Switzerland

24 19 5 Department of Internal Medicine, Hôpital neuchâtelois, Neuchâtel, Switzerland

25 20 6 Division of Infectious Diseases and Hospital Epidemiology, University and University Hospital  
26 21 Zurich, Zurich, Switzerland

27 22 7 Institute of Social and Preventive Medicine (ISPM), University of Bern, Bern, Switzerland

28 23  
29 24 progress! Safe urinary catheterization collaboration group\*:

30 25 • Adriana Degiorgi (Ente Ospedaliero Cantonale, Lugano Civico)

31 26 • Thomas Bregenzer (Spital Lachen)

32 27 • Stefan P Kuster (University and University Hospital Zurich)

33 28 • Marianne Laguardia (Inselspital Universitätsspital Bern)

34 29 • Isabelle Montavon-Blondet (Hôpital neuchâtelois)

35 30 • Jasmin Perret (Kantonsspital Winterthur)

36 31 • Vineeta Bansal (Kantonsspital Winterthur)

37 32 • Anja Waltenspül (Luzerner Kantonsspital)

38 33 • Sonja Bertschy (Luzerner Kantonsspital)

39 34 \*non-author contributors

40 35

41 36 Corresponding author:

42 37 Andrea Niederhauser

43 38 Asylstrasse 77

44 39 CH-8032 Zurich

45 40 Phone: +41 43 244 14 80

46 41 Fax: +41 43 244 14 81

47 42 E-mail: niederhauser@patientensicherheit.ch

48 43  
49 44 Word count abstract: 248

50 45 Word count manuscript: 3772 words

51 46 Key words: indwelling urinary catheter, survey, patient safety, perception, intervention bundle

1  
2  
3  
4 47 **Abstract**

5  
6  
7 48 **Objective:** To evaluate changes in staff perspectives towards indwelling urinary catheter (IUC) use  
8 49 after implementation of a one-year quality improvement project.

9  
10  
11 50 **Design:** Repeated cross-sectional survey at baseline (October 2016) and 12-month follow-up  
12 51 (October 2017).

13  
14  
15 52 **Setting:** Seven acute care hospitals in Switzerland

16  
17 53 **Participants:** The survey was targeted at all nursing and medical staff members working at the  
18 54 participating hospitals at the time of survey distribution. A total of 1,579 staff members participated  
19 55 in the baseline survey (49% response rate) and 1,527 participated in the follow-up survey (47%  
20 56 response rate).

21  
22  
23  
24 57 **Intervention:** A multimodal intervention bundle, consisting of an evidence-based indication list,  
25 58 daily re-evaluation of ongoing catheter need and staff training, was implemented over the course of  
26 59 9 months.

27  
28  
29  
30 60 **Main Outcome Measures:** Staff knowledge (15 items), perception of current practices and culture  
31 61 (scale 1-7), self-reported responsibilities (multiple-response question) and determinants of  
32 62 behavior (scale 1-7) before and after implementation of the intervention bundle.

33  
34  
35 63 **Results:** The mean number of correctly answered knowledge questions increased significantly  
36 64 between the two survey periods ( $T_0$ : 10.4,  $T_1$ : 11.0,  $p < 0.001$ ). Self-reported responsibilities with  
37 65 regard to IUC management by nurses and physicians changed only slightly over time. Perception  
38 66 of current practices and culture in regard to safe urinary catheter use increased significantly ( $T_0$ :  
39 67 5.3,  $T_1$ : 5.5,  $p < 0.001$ ). Significant changes were also observed for determinants of behavior ( $T_0$ :  
40 68 5.3,  $T_1$ : 5.6,  $p < 0.001$ ).

41  
42  
43  
44  
45  
46 69 **Conclusion:** We found small, but significant changes in staff perceptions after implementation of  
47 70 an evidence-based intervention bundle. Efforts now need to be targeted at sustaining and  
48 71 reinforcing these changes, so that restrictive use of IUCs becomes an integral part of the hospital  
49 72 culture.

50  
51  
52  
53 73



1  
2  
3  
4 74 **ARTICLE SUMMARY**

5  
6 75 **Strengths and limitations of this study**

- 7  
8  
9 76 • The repeated survey design allowed us to assess changes in staff perspectives after  
10 77 implementation of a quality improvement intervention. Sustainability of the effects over time,  
11 78 however, could not be evaluated.
- 12  
13  
14 79 • By using self-generated identification codes to match respondents in the two surveys, it was  
15 80 possible to evaluate if results obtained on the group level (two cross-sections) represent results  
16 81 on the individual participant level (longitudinal).
- 17  
18 82 • No control group was included in the study design. It is possible that other trends or measures  
19 83 within the hospitals may have affected the outcomes.
- 20  
21  
22  
23  
24 84

## 85 INTRODUCTION

86 Although indwelling urinary catheters (IUCs) are commonly used in acute care hospitals, an  
87 appropriate medical indication is often missing [1,2]. IUCs are associated with urinary tract  
88 infections (UTI) and non-infectious complications such as hematuria and urethral injury. The  
89 reduction of IUC use is therefore a key measure to increase patient safety [3–7].

90 Several quality improvement (QI) studies have shown that avoiding inappropriate IUC use prevents  
91 urinary catheter harm [8–11]. Common to these studies is the implementation of a multimodal  
92 intervention bundle focusing on the reduction of unnecessary catheter use, proper insertion  
93 techniques and safe catheter maintenance. Successful bundles consist of catheter restriction  
94 protocols providing appropriate indications for catheter use and suggesting alternative urine  
95 collection methods, evaluation strategies such as reminders and/or stop orders to assess ongoing  
96 catheter need and prompt removal of unnecessary catheters, as well as educational interventions  
97 to increase awareness among healthcare workers and ensure safe catheter handling [12].

98 In addition to best practices, changes in behavior and culture – the so-called socio-adaptive  
99 component – are considered a core element of quality improvement efforts [13,14]. The  
100 organizational culture, which may be described as “the way we do things around here” [15] is  
101 known to have a favorable influence on patient safety, although the evidence for a direct causative  
102 effect on patient outcome is weak [16,17]. Several studies suggest that changes in staff knowledge  
103 and attitudes are needed to improve practice in regard to appropriate catheter utilization and  
104 prevention of catheter-associated infections [18–23]. However, to our knowledge only few studies  
105 [24–26] have reported the effects of a multi-modal intervention bundle on staff knowledge and  
106 socio-adaptive components, such as perceptions and beliefs, but none of them addressed all these  
107 factors together.

108 To promote safe urinary catheter use in Swiss hospitals, a national QI project was developed and  
109 conducted by the Swiss Patient Safety Foundation in partnership with Swissnoso, the National  
110 Center for Infection Control. The QI project was modeled after other successful QI initiatives in the  
111 US [8,9]. The overall project goal was to reduce IUC use and to promote safe catheter insertion  
112 and maintenance by implementing an evidence-based intervention bundle in seven Swiss acute  
113 care hospitals.

114 With the present study, we aimed to assess the changes in staff perspectives in the participating  
115 hospitals using survey data collected before and after implementation of the intervention bundle.  
116 We hypothesized that the intervention bundle may affect staff members differently depending on  
117 their tasks, responsibilities and familiarity with catheterization. We therefore stratified results

1  
2  
3  
4 118 according to professional group, managerial function (a proxy for hierarchical status and clinical  
5  
6 119 proximity) and frequency of catheter use in order to explore changes within these groups over time.  
7  
8 120 In before/after study designs, data from two (or more) cross-sectional survey waves are commonly  
9  
10 121 analyzed on group level to evaluate short term effects of an intervention [27–29]. However, given  
11  
12 122 the high staff turnover in hospitals and self-selection of participants, it is possible that survey  
13  
14 124 staff perspectives between two time points may merely be due to a different composition of  
15  
16 125 participant groups. We therefore used the self-generated identification code technique [30] to  
17  
18 126 anonymously match respondents in the two surveys. This allowed us to compare the effects  
19  
20 127 observed in the overall sample to the effects observed in a sub-sample of matched participants, for  
21  
22 128 whom we can assume that they had been working at the hospitals for the entire duration of the  
23  
24 129 project.

## 130 **METHODS**

### 131 **Setting**

132 The QI project consisted of two parts, a campaign to raise awareness among health care workers  
133 and an intervention that was implemented in seven pilot hospitals. For the campaign,  
134 recommendations on safe IUC use in acute care hospitals [31] were developed and disseminated  
135 to all acute care hospitals (including pilot hospitals) in Switzerland after collection of baseline data  
136 in the pilot hospitals (November 2016). The intervention focused on the implementation of an  
137 evidence-based intervention bundle in seven pilot hospitals over the course of nine months (Feb-  
138 Oct 2017). The participating hospitals contractually committed to implement the three main  
139 components of the bundle: an evidence-based indication list for urinary catheterization (appendix  
140 1), a process to evaluate and document the continued need for catheterization on a daily basis,  
141 and staff education on proper catheter insertion and maintenance. For the latter, hospitals were  
142 required to provide theoretical trainings on safe urinary catheter utilization and catheter-associated  
143 complications to all nursing and medical staff members working on the pilot units. They were also  
144 encouraged to offer practical training sessions for catheter insertion. Local project teams received  
145 templates for training materials from the program team, but they were free to design and organize  
146 the trainings according to their local structure and processes. In theoretical trainings, information  
147 on risk factors for, and prevention of catheter-associated complications, correct indications for  
148 urinary catheters and proper catheter insertion techniques was conveyed either by means of  
149 presentations at staff events and/or through completion of an e-learning tool. In most hospitals,  
150 theoretical trainings were mandatory for nursing and medical staff. In two hospitals, theoretical  
151 inputs were immediately followed by practical training sessions for catheter insertion; in four

1  
2  
3  
4 152 hospitals, practical trainings were offered on separate occasions and attendance was voluntary.  
5  
6 153 One hospital did not offer practical training sessions. No exact data could be elicited in regard to  
7  
8 154 the percentage of staff members from the pilot units that actually completed theoretical and/or  
9  
10 155 practical trainings. Strategies to implement the intervention bundle in pilot hospitals included  
11  
12 156 designated champions, internal newsletters, posters and screen savers with key project messages.

13 157 The hospitals (1 small local hospital, 4 mid-sized regional hospitals and 2 university hospitals) were  
14  
15 158 recruited to represent different organizational types and geographic regions. Each hospital could  
16  
17 159 decide which wards participated in the project; however, the participation of the emergency  
18  
19 160 department was mandatory. Participating wards included internal medicine, general surgery and  
20  
21 161 neurosurgery and gynecology/obstetrics. At each site, interdisciplinary project teams, generally  
22  
23 162 consisting of physicians, nurses and representatives from quality management and the infection  
24  
25 163 prevention unit were responsible for implementing the intervention bundle in the participating  
26  
27 164 organizational units. To encourage knowledge exchange between the local project teams, two full-  
28  
29 165 day workshops were organized at the beginning and the end of the intervention phase. The  
30  
31 166 intervention was accompanied by a before/after surveillance and a before/after staff survey. The  
32  
33 167 results of the before/after surveillance, which measured urinary catheter utilization ratio and  
34  
35 168 catheter-associated complications, will be reported in another publication [32]. Our publication will  
36  
37 169 focus on the results from the staff surveys and their changes over time.

### 34 170 **Study design**

36  
37 171 To collect data on staff perspectives regarding IUC use, we conducted a written survey during two  
38  
39 172 time periods. The baseline survey ( $T_0$ ) took place in October 2016, four months before the  
40  
41 173 participating hospitals started to implement the intervention bundle. The follow-up survey ( $T_1$ ) took  
42  
43 174 place one year later in October 2017. At that point, all hospitals had implemented the intervention  
44  
45 175 bundle and had been working with the new processes for six to eight months. The target  
46  
47 176 population consisted of surgical positioning specialists, nurses (healthcare assistants, registered  
48  
49 177 nurses and nursing managers) and physicians (residents, senior and chief physicians) working on  
50  
51 178 the participating units in one of the seven pilot hospitals at the time of the survey. Staff members  
52  
53 179 not involved in direct patient care, healthcare workers in education and affiliated physicians were  
54  
55 180 excluded.

### 53 181 **Questionnaire**

55  
56 182 The 55-item standardized questionnaire was developed specifically for this study by the authors  
57  
58 183 based on prior survey research conducted during a similar improvement project [33,34], and a  
59  
60 184 review of existing surveys reported in the literature [18–22] (appendix 2). The German version of

1  
2  
3  
4 185 the questionnaire was pretested among 42 physicians and nurses from three hospitals not  
5  
6 186 participating in the project. Based on their feedback, minor modifications were made to increase  
7  
8 187 validity. The final version was translated into French and Italian by professional translators.  
9  
10 188 Translations were reviewed by four native speakers per language.

11  
12 189 The questionnaire consisted of four thematic sections. The first section entailed a 15-item  
13  
14 190 knowledge test on prevalence, risk factors and prevention of catheter-associated complications, as  
15  
16 191 well as appropriate reasons for catheter placement. The second section included 13 items  
17  
18 192 assessing respondents' perception regarding good practices and cultural factors for safe IUC use  
19  
20 193 within the organization. Items were rated on a 7-point Likert scale from "strongly disagree" (1) to  
21  
22 194 "strongly agree" (7). Two items were negatively worded and were reverse coded for data analysis.  
23  
24 195 The content of the first two sections of the questionnaire was in line with the above-mentioned  
25  
26 196 recommendations for safe catheter use [31]. The third section examined self-perceived  
27  
28 197 responsibilities in regard to catheter prescription, placement and care by means of one multiple-  
29  
30 198 response question. The fourth section assessed determinants of personal behavior in regard to the  
31  
32 199 reduction of urinary catheters. Items for this section were developed based on the theory of  
33  
34 200 planned behavior [35]. This theory states that an individual's intention to perform a behavior is  
35  
36 201 largely determined by three factors, namely a favorable or unfavorable evaluation of the behavior  
37  
38 202 (attitudes), the perceived social expectations to perform or not perform the behavior (subjective  
39  
40 203 norms) and the perceived capability to perform the behavior (perceived behavioral control) [35,36].  
41  
42 204 In our questionnaire, the three constructs (attitudes, subjective norms and perceived behavioral  
43  
44 205 control) were measured with five items each. All 15 items were rated on a 7-point Likert scale from  
45  
46 206 "strongly disagree" (1) to "strongly agree" (7). Two items were negatively worded and were reverse  
47  
48 207 coded for analysis.

49  
50 208 The questionnaire also included a section on demographics and experience with placing urinary  
51  
52 209 catheters. On the first page of the questionnaire, participants were asked to generate an 8-digit  
53  
54 210 code consisting of three elements. To do this, respondents were asked to link the following three  
55  
56 211 elements into a string of letters and numbers: the mother's initials (maiden name), father's initials  
57  
58 212 and mother's birth year (for an example see appendix 2). These three elements were selected  
59  
60 213 because they do not change over time and refer to personal information usually known by the  
61  
62 214 respondent [30]. With this technique, it is possible to clearly identify data from the same subject  
63  
64 215 and, at the same time, ensure anonymity. We used the same questionnaire at both time points. For  
65  
66 216 the follow-up survey, we included four additional questions that specifically referred to the  
67  
68 217 intervention bundle. All other items remained unaltered.

## 218 **Data collection**

1  
2  
3  
4 219 Each local project team was required to identify all eligible staff members from the target  
5  
6 220 population, inform and invite them to participate in the survey and distribute and collect the print  
7  
8 221 version of the questionnaire. In some sites, questionnaires were handed out during shift reports or  
9  
10 222 other staff events; in others they were distributed to internal mail boxes. In one hospital,  
11  
12 223 questionnaires were sent to private home addresses. Participation in the survey was voluntary and  
13  
14 224 anonymous. The returning of the questionnaire was considered informed consent.

## 15 225 **Ethics**

16  
17 226 Approval for the study was obtained from the Lead Ethics Committee of the Canton of Bern,  
18  
19 227 Switzerland (no. 2016-00682).

## 20 21 228 **Data analysis**

22  
23 229 Descriptive statistics were calculated for each item. Missing values were excluded from analysis  
24  
25 230 (pairwise exclusion). A large proportion of subjects participating in the baseline survey did not  
26  
27 231 participate in the follow-up survey. Thus, responses to both surveys cannot be assumed to stem  
28  
29 232 from the same sample. Therefore, tests for unpaired samples were used for the main analyses  
30  
31 233 comparing results between time points (see below for analyses of matched individuals). Chi-  
32  
33 234 squared tests were used to determine differences in sample composition. A “knowledge score” was  
34  
35 235 generated consisting of the number of correctly answered questions out of 15. Cronbach’s alpha  
36  
37 236 was calculated to determine internal consistency of the 13-item perception scale and the 15-item  
38  
39 237 behavior scale. For both scales a mean scale score and 95% confidence interval was computed.  
40  
41 238 Knowledge score and mean scale scores were computed for the overall sample and stratified by  
42  
43 239 professional group (nurses/physicians), managerial function (with/without) and frequency of  
44  
45 240 catheter placement (frequent/infrequent user). Frequent users were defined as healthcare workers  
46  
47 241 placing a catheter a few times a month or more often; infrequent users as placing a catheter a few  
48  
49 242 times a year or less often. Frequency was determined based on the self-reported frequency of  
50  
51 243 placing a catheter in the current work position. Changes between time points were determined for  
52  
53 244 the overall sample and each subgroup by means of *t*-tests for independent samples.

54  
55 245 To analyze the sub-sample of matched participants, self-generated IDs were matched based on  
56  
57 246 the 8-digit code and hospital affiliation. For these sub-analyses, cases with identical codes or  
58  
59 247 missing data were dropped. For matched participants, knowledge score and mean scale scores  
60  
248 were computed. To determine changes between time points in this sub-sample of matched  
249 participants, we used paired analysis. Changes between time points were determined by means of  
250 *t*-test for paired samples. Mixed analysis of variance was conducted to determine if participation in  
251 theoretical and practical training had an effect on knowledge scores over time. In addition, we

1  
2  
3  
4 252 performed difference-in-difference analyses to compare results for group-level data (cross-  
5 253 sectional data of two unmatched groups) and individual-level data (longitudinal data of matched  
6 254 participants). For each of the main outcomes, we compare average change over time among  
7 255 matched participants to the average change over time among unmatched participants.

10  
11 256 All tests were two-sided and a p-value  $<0.05$  was considered statistically significant. Cohen's *d*  
12 257 was calculated as a measure of effect size. For paired samples, the formula  $t_c$  as described in  
13 258 Dunlap et al [37] was used to calculate *d*. As an orientation for interpreting the importance of the  
14 259 effect, we used the following classification: 0.2=small effect, 0.5=medium effect and 0.8=large  
15 260 effect [38]. All analyses were performed with Stata version 14.1 (StataCorp, College Station,  
16 261 Texas).

## 22 262 **Patient and public involvement**

23  
24 263 Patients or public were not involved in any stages of this study.

## 26 264 **RESULTS**

### 29 265 **Response rate and study sample**

30  
31 266 1,579 out of 3,245 invited staff members participated in the baseline survey (48.7% response rate)  
32 267 and 1,527 out of 3,235 invited staff members participated in the follow-up survey (47.2% response  
33 268 rate). The proportion of questionnaires received from each hospital in the total sample was similar  
34 269 in both waves ( $p=0.39$ ). The characteristics of the study samples at  $T_0$  and  $T_1$  are provided in table  
35 270 1. Sample composition differed slightly in regard to age ( $p=0.03$ ), profession ( $p=0.04$ ) and work unit  
36 271 between the two time points ( $p=0.02$ ).

37  
38 272 Almost all of the 3,106 participants in both survey periods generated an 8-digit ID. At baseline, 35  
39 273 respondents (2.2%) had missing values on each of the three code elements and the sample  
40 274 contained 3 sets of identical IDs. At follow-up, 51 respondents (3.3%) did not provide an 8-digit ID  
41 275 and 2 sets of identical IDs were found. For 420 respondents, we were able to successfully match  
42 276 the 8-digit identification code and hospital affiliation. This represents 27.5% of the 1,527 potential  
43 277 matches. 1,118 IDs were only present at  $T_0$  and 1,052 IDs were only present at  $T_1$ .

44  
45  
46  
47  
48  
49  
50  
51  
52 278

**Table 1. Study sample characteristics**

|                                                                     | T <sub>0</sub><br>n = 1,579 | T <sub>1</sub><br>n = 1,527 | p-value <sup>+</sup> |
|---------------------------------------------------------------------|-----------------------------|-----------------------------|----------------------|
| Participants per hospital, n (%) *                                  |                             |                             | 0.385                |
| Hospital A (approx. 900 beds)                                       | 221 (14.0)                  | 223 (14.6)                  |                      |
| Hospital B (approx. 800 beds)                                       | 154 (9.8)                   | 170 (11.1)                  |                      |
| Hospital C (approx. 500 beds)                                       | 138 (8.7)                   | 127 (8.3)                   |                      |
| Hospital D (approx. 500 beds)                                       | 362 (22.9)                  | 325 (21.3)                  |                      |
| Hospital E (approx. 400 beds)                                       | 347 (22.0)                  | 342 (22.4)                  |                      |
| Hospital F (approx. 300 beds)                                       | 284 (18.0)                  | 250 (16.4)                  |                      |
| Hospital G (approx. 100 beds)                                       | 73 (4.6)                    | 90 (5.9)                    |                      |
| Females, n (%)                                                      | 1,187 (77.6)                | 1,191 (79.7)                | 0.173                |
| Age in years (mean, SD)                                             | 36.8 (10.5)                 | 35.9 (10.5)                 | 0.0255               |
| Profession, n (%)                                                   |                             |                             | 0.043                |
| Nurse                                                               | 1,050 (69.1)                | 1,084 (72.8)                |                      |
| Physician                                                           | 350 (23.0)                  | 288 (19.3)                  |                      |
| Other                                                               | 120 (7.9)                   | 117 (7.9)                   |                      |
| With managerial function, n (%)                                     | 232 (16.4)                  | 193 (13.9)                  | 0.066                |
| Years working in this hospital, n (%)                               |                             |                             | 0.849                |
| < 2 years                                                           | 376 (24.5)                  | 380 (25.4)                  |                      |
| 2 to < 5 years                                                      | 385 (25.0)                  | 357 (23.9)                  |                      |
| 5 to < 10 years                                                     | 264 (17.2)                  | 271 (18.1)                  |                      |
| 10 to < 20 years                                                    | 307 (20.0)                  | 297 (19.9)                  |                      |
| ≥ 20 years                                                          | 206 (13.4)                  | 190 (12.7)                  |                      |
| Work unit in the past three months, n (%)                           |                             |                             | 0.020                |
| Ward                                                                | 906 (58.5)                  | 963 (63.9)                  |                      |
| Emergency department                                                | 248 (16.0)                  | 190 (12.6)                  |                      |
| Intensive care unit                                                 | 144 (9.3)                   | 129 (8.6)                   |                      |
| Operating room                                                      | 146 (9.4)                   | 141 (9.4)                   |                      |
| Other                                                               | 104 (6.7)                   | 85 (5.6)                    |                      |
| Overall experience with catheter placement throughout career, n (%) |                             |                             | 0.300                |
| Never                                                               | 26 (1.7)                    | 30 (2.0)                    |                      |
| 1-5 times                                                           | 169 (11.0)                  | 171 (11.4)                  |                      |
| 6-20 times                                                          | 341 (22.2)                  | 370 (24.6)                  |                      |
| > 20 times                                                          | 1,002 (65.2)                | 931 (62.0)                  |                      |
| Frequency of catheter placement in current position, n (%)          |                             |                             | 0.084                |
| Frequent user                                                       | 690 (44.2)                  | 618 (41.1)                  |                      |
| Infrequent user                                                     | 871 (55.8)                  | 885 (58.9)                  |                      |

Note: Due to rounding percentages may not always add up to 100%.

\* In the larger hospitals, not all of the departments participated in the project

+ p-values for changes between the two time periods

T<sub>0</sub>=baseline survey, T<sub>1</sub>=follow-up survey

Frequent user=places a catheter a few times a month or more often

Infrequent user=places a catheter a few times a year or less often



## 280 Knowledge

281 For the overall study sample, the mean number of correctly answered knowledge items increased  
 282 significantly between T<sub>0</sub> and T<sub>1</sub> (p<0.001) (table 2). Subgroup analysis indicates that knowledge  
 283 scores increased in particular for nurses, staff members without managerial function and staff  
 284 members frequently placing catheters. Effect sizes for the changes between the time points were  
 285 small to moderate. Percentages of correct answers for each of the 15 items are provided in  
 286 appendix 3.

**Table 2. Mean number of correct answers provided for 15 knowledge items**

|                                 | Mean T <sub>0</sub> (95% CI) | n <sub>T0</sub> | Mean T <sub>1</sub> (95% CI) | n <sub>T1</sub> | p-value | Effect size |
|---------------------------------|------------------------------|-----------------|------------------------------|-----------------|---------|-------------|
| Overall sample                  | 10.4 (10.3;10.5)             | 1,579           | 11.0 (10.9;11.1)             | 1,527           | <0.001  | 0.29        |
| Professional group              |                              |                 |                              |                 |         |             |
| Nurses                          | 10.2 (10.1;10.4)             | 1,050           | 10.9 (10.8;11.0)             | 1,084           | <0.001  | 0.35        |
| Physicians                      | 11.1 (11.0;11.3)             | 350             | 11.4 (11.2;11.6)             | 288             | 0.047   | 0.16        |
| Managerial function             |                              |                 |                              |                 |         |             |
| With                            | 11.3 (11.1;11.5)             | 232             | 11.6 (11.4;11.9)             | 193             | 0.058   | 0.19        |
| Without                         | 10.3 (10.1;10.4)             | 1,187           | 10.9 (10.8;11.0)             | 1,199           | <0.001  | 0.33        |
| Frequency of catheter placement |                              |                 |                              |                 |         |             |
| Frequent user                   | 10.0 (9.8;10.1)              | 690             | 10.7 (10.6;10.9)             | 618             | <0.001  | 0.40        |
| Infrequent user                 | 10.8 (10.7;10.9)             | 871             | 11.2 (11.1;11.3)             | 885             | <0.001  | 0.22        |
| Matched ID                      | 10.4 (10.3;10.6)             | 420             | 11.3 (11.1;11.5)             | 420             | <0.001  | 0.49        |
| Unmatched ID                    | 10.5 (10.3;10.6)             | 1,118           | 11.0 (10.9;11.1)             | 1,052           | <0.001  | 0.31        |

T<sub>0</sub>=baseline survey, T<sub>1</sub>=follow-up survey

Frequent user=places a catheter a few times a month or more often

Infrequent user=places a catheter a few times a year or less often

287

288 We used the sub-sample of matched participants to examine the effect of training on the change in  
 289 knowledge score over time. Among all matched respondents, 102 (25.3%) indicated having  
 290 participated in *both* theoretical and practical training; 130 (32.2%) respondents had participated in  
 291 *either* theoretical or practical training and 172 (42.6%) respondents did not participated in *any*  
 292 training (missing values n=16). Results from the mixed analysis of variance showed that there was  
 293 no significant interaction effect between time and training ( $F_{2,401} = 1.05, p = 0.35$ ). In other words,  
 294 knowledge scores between participants with practical and/or theoretical training did not change  
 295 differently over time as compared to participants without training.

## 296 Perception of practices and culture

297 The mean scale score for perception of current practices and culture increased significantly within  
 298 the overall sample and within all subgroups between the two time points (p<0.001) (table 3).

299 Generally, agreement to the statements was moderate at baseline and strengthened over time.  
 300 Yet, agreement remained moderately strong, with no group reaching a mean scale score above 6  
 301 even after implementation of the intervention bundle. Mean scores for each item are provided in  
 302 appendix 4.

**Table 3. Perception: mean scale score**

|                                 | Mean $T_0$ (95%<br>CI) | $n_{T_0}$ | Mean $T_1$ (95%<br>CI) | $n_{T_1}$ | p-value | Effect<br>size |
|---------------------------------|------------------------|-----------|------------------------|-----------|---------|----------------|
| Overall sample                  | 5.3 (5.3; 5.3)         | 1,568     | 5.5 (5.5; 5.6)         | 1,521     | <0.001  | 0.31           |
| Professional group              |                        |           |                        |           |         |                |
| Nurses                          | 5.4 (5.3; 5.4)         | 1,044     | 5.6 (5.6; 5.7)         | 1,082     | <0.001  | 0.33           |
| Physicians                      | 5.1 (5.0; 5.1)         | 347       | 5.3 (5.2; 5.4)         | 286       | <0.001  | 0.29           |
| Managerial function             |                        |           |                        |           |         |                |
| With                            | 5.2 (5.1; 5.3)         | 230       | 5.6 (5.5; 5.7)         | 191       | <0.001  | 0.52           |
| Without                         | 5.3 (5.3; 5.4)         | 1,180     | 5.6 (5.5; 5.6)         | 1,197     | <0.001  | 0.29           |
| Frequency of catheter placement |                        |           |                        |           |         |                |
| Frequent user                   | 5.2 (5.1; 5.3)         | 690       | 5.4 (5.3; 5.5)         | 618       | <0.001  | 0.22           |
| Infrequent user                 | 5.4 (5.3; 5.4)         | 861       | 5.7 (5.6; 5.7)         | 880       | <0.001  | 0.37           |
| Matched ID                      | 5.4 (5.3; 5.4)         | 416       | 5.6 (5.5; 5.7)         | 416       | <0.001  | 0.32           |
| Unmatched ID                    | 5.3 (5.2; 5.3)         | 1,108     | 5.5 (5.5; 5.6)         | 1,049     | <0.001  | 0.31           |

Note: Scale consisted of 13 items.

Items were answered on a scale from 1 (strongly disagree) to 7 (strongly agree).

Cronbach's alpha for the scale:  $T_0$   $\alpha=0.79$  and  $T_1$   $\alpha=0.80$

$T_0$ =baseline survey,  $T_1$ =follow-up survey

Frequent user=places a catheter a few times a month or more often

Infrequent user=places a catheter a few times a year or less often

303  
 304 **Responsibilities**  
 305 Self-reported responsibilities concerning IUC management by nurses and physicians changed only  
 306 slightly over time (figure 1). At baseline and at follow-up, nurses mainly felt responsible for placing,  
 307 maintaining and removing an IUC. However, at  $T_1$ , fewer nurses felt responsible for prescribing  
 308 catheter placement ( $p<0.001$ ) as compared to  $T_0$  and a higher percentage felt responsible for  
 309 assessing the need for continued catheterization ( $p=0.002$ ). Physicians perceived themselves to  
 310 be mainly responsible for ordering catheter placement and removal at both time points. At  $T_1$ ,  
 311 fewer of them felt responsible for placing or assisting with placing an IUC as compared to  $T_0$ , but  
 312 differences were not statistically significant.

### 313 **Determinants of behavior**

314 The mean score for the scale assessing the determinants of behavior increased significantly  
 315 between baseline and follow-up ( $p<0.001$ ). Positive changes in mean scores were observed for all

three constructs (attitudes, subjective norms and perceived behavioral control). They were particularly strong for items assessing perceived social expectations to use catheters restrictively (see appendix 5). The positive trends could also be observed for professional group, managerial function and frequency of catheter placement (table 4). Medium effect sizes indicate practical relevance of these changes.

**Table 4. Determinants of behavior: mean scale score**

|                                 | Mean $T_0$ (95% CI) | $n_{T_0}$ | Mean $T_1$ (95% CI) | $n_{T_1}$ | p-value | Effect size |
|---------------------------------|---------------------|-----------|---------------------|-----------|---------|-------------|
| Overall sample                  | 5.3 (5.3; 5.3)      | 1,539     | 5.6 (5.6; 5.6)      | 1,502     | <0.001  | 0.43        |
| Professional group              |                     |           |                     |           |         |             |
| Nurses                          | 5.3 (5.2; 5.3)      | 1,046     | 5.6 (5.6; 5.7)      | 1,083     | <0.001  | 0.56        |
| Physicians                      | 5.4 (5.3; 5.5)      | 349       | 5.6 (5.5; 5.6)      | 287       | 0.005   | 0.23        |
| Managerial function             |                     |           |                     |           |         |             |
| With                            | 5.6 (5.5; 5.7)      | 230       | 5.8 (5.7; 5.9)      | 192       | <0.001  | 0.38        |
| Without                         | 5.2 (5.2; 5.3)      | 1,184     | 5.6 (5.5; 5.6)      | 1,198     | <0.001  | 0.50        |
| Frequency of catheter placement |                     |           |                     |           |         |             |
| Frequent user                   | 5.2 (5.2; 5.3)      | 675       | 5.6 (5.5; 5.6)      | 615       | <0.001  | 0.46        |
| Infrequent user                 | 5.3 (5.3; 5.4)      | 847       | 5.6 (5.6; 5.7)      | 884       | <0.001  | 0.41        |
| Matched ID                      | 5.3 (5.3; 5.4)      | 405       | 5.7 (5.6; 5.8)      | 405       | <0.001  | 0.58        |
| Unmatched ID                    | 5.3 (5.3; 5.3)      | 1,090     | 5.6 (5.5; 5.6)      | 1,038     | <0.001  | 0.37        |

Note: Scale consisted of 15 items.

Items were answered on a scale from 1 (strongly disagree) to 7 (strongly agree).

Cronbach's alpha for scale:  $T_0$   $\alpha=0.72$  and  $T_1$   $\alpha=0.74$

$T_0$ =baseline survey,  $T_1$ =follow-up survey

Frequent user=places a catheter a few times a month or more often

Infrequent user=places a catheter a few times a year or less often

321

### 322 Difference-in-difference analyses of group and individual level data

323 Knowledge scores increased slightly more among participants with a matched ID compared to  
 324 unmatched participants ( $p=0.047$ ). Mean scale scores for perception of current practices and culture  
 325 increased for both matched and unmatched participants to a similar extent ( $p=0.894$ ). Mean scale  
 326 scores for determinants of behavior increased slightly more for participants with a matched ID  
 327 compared to unmatched participants ( $p=0.033$ ).

### 328 DISCUSSION

329 We observed positive changes in staff knowledge, perceptions and attitudes regarding IUC use  
 330 following the implementation of a multimodal intervention bundle in seven hospitals. Observed  
 331 effects were small to moderate, requiring a closer look at the challenges of implementing and  
 332 evaluating a multi-faceted intervention bundle in a large scale, national program. We found that in

1  
2  
3  
4 333 two of the thematic sections – knowledge and determinants of behavior - the scores for matched  
5  
6 334 participants increased slightly more than for unmatched participants. This seems plausible as the  
7  
8 335 unmatched group includes participants of various levels of program exposition. It suggests that  
9  
10 336 data analyzed on group level (two unmatched cross-sections) to evaluate short term effects of an  
11  
12 337 intervention can to some extent, but not fully represent longitudinal effects on the individual  
13  
14 338 participant level.

15 339 Knowledge scores increased significantly between baseline and follow-up, indicating that staff  
16  
17 340 members in our pilot hospitals had more factual knowledge about the use and potential harm of  
18  
19 341 urinary catheters after the intervention. Interestingly, however, we could not verify that participation  
20  
21 342 in education and training sessions contributed to knowledge increases. When analyzing the results  
22  
23 343 in our sub-sample of matched participants (i.e. individuals for whom we know that they worked in  
24  
25 344 the hospital throughout the entire program), we found that changes in knowledge scores did not  
26  
27 345 differ between staff members with and without training. The findings indicate that other factors,  
28  
29 346 such as the dissemination of the indication list or the presence of champions may have contributed  
30  
31 347 to the observed effects in knowledge. Regarding respondents' perception of current practices and  
32  
33 348 cultural factors within their organization, we also found a small, but significant effect at the end of  
34  
35 349 the intervention. The moderate effect size suggests that staff members indeed perceived positive  
36  
37 350 changes in IUC management and safety climate within their organization. Factors determining  
38  
39 351 intentions to perform a certain behavior, namely personal attitudes, perceived behavioral control  
40  
41 352 and subjective norms changed over the course of the project too. At follow-up, staff members  
42  
43 353 generally expressed higher willingness to contribute to a safe and restrictive use of IUCs. In  
44  
45 354 particular, participants felt higher expectations from their social environment to reduce catheters,  
46  
47 355 suggesting that a change in culture could indeed be initiated.

48  
49 356 Even though there was a clear positive trend, the differences between survey periods on all three  
50  
51 357 sections of the questionnaire (knowledge, perception of practices and culture, and determinants of  
52  
53 358 behavior) were only small to moderate. Recommended practices and socio-adaptive components  
54  
55 359 were thus, from the perspective of participants, not fully established even after the intervention.  
56  
57 360 These results are not surprising, because change in organizational culture is a slow process,  
58  
59 361 requiring endurance and continuous effort that could not be provided within the short time frame of  
60  
61 362 the QI program. Studies that have collected long-term data on surgical checklist implementation  
62  
63 363 state suggest that it takes time for cultural change to develop and for positive effects to fully  
64  
65 364 become evident [39,40]. For example, an Australian study that has examined compliance with  
66  
67 365 surgical safety checklist use reports that reduction in mortality rates reached significance only in  
68  
69 366 the 2-3 year period after implementation [39]. In addition, we did not strictly define implementation  
70  
71 367 strategies in order to allow pilot hospitals to adapt the intervention bundle to their local context.

1  
2  
3  
4 368 Therefore, implementation fidelity could not systematically be assessed. Informal feedback from  
5  
6 369 local project coordinators suggests that it was not always possible to deliver the intervention  
7  
8 370 bundle as intended. For example, even though training sessions were mandatory, not all staff from  
9  
10 371 the target population could eventually be reached.

11 372 Another explanation could be high staff turnover rates. Almost all of the respondents generated an  
12  
13 373 8-digit code. Interestingly, however, only 28% of the IDs provided could be matched between the  
14  
15 374 two surveys. Participants at follow-up were thus, for the most part, not the same individuals as at  
16  
17 375 baseline. This could be a sign for high staff turnover rates during the intervention period. However,  
18  
19 376 it is also possible that unmatched participants had been working at the hospital throughout the  
20  
21 377 intervention, but had been unwilling or unable to participate in the same survey twice.  
22  
23 378 Nevertheless, this finding points to the importance of ensuring that hospitals continuously offer  
24  
25 379 training, education and policy reinforcement. Continued efforts to incorporate recommended  
26  
27 380 practices into routine care even after completion of the actual project phase are needed to move  
28  
29 381 the intervention from a time-limited “project” to a continuous commitment and ensure that  
30  
31 382 motivation to reduce urinary catheters is kept at a high level [41,42].

32  
33 383 In our QI program, a before/after surveillance for catheterization and catheter-associated  
34  
35 384 complications was conducted in the same time periods as the staff survey. Results show a  
36  
37 385 significant decrease in catheter utilization rates in all pilot hospitals [32]. Secondary data analysis  
38  
39 386 would be needed to examine the relationship between catheter utilization rates and staff  
40  
41 387 perspectives. Some hypotheses can be put forward to explain the observation that while changes  
42  
43 388 in staff perspectives were rather small, we did see a decrease in catheter utilization. It is possible  
44  
45 389 that even small changes in staff knowledge and perception can have a substantial practical  
46  
47 390 relevance. However, it is also possible that the items in our questionnaire do not adequately  
48  
49 391 measure knowledge and perceptions required to reduce IUC use (content validity). To our  
50  
51 392 knowledge, no other study has assessed the effects of an intervention bundle on staff behavior  
52  
53 393 with similar measures; therefore it is not possible to relate our findings to existing research.  
54  
55 394 Wakefield and colleagues found that perceptions about the behavior of professional peers, and the  
56  
57 395 personal belief that engaging in a certain behavior will lead to better safety outcomes, are the  
58  
59 396 strongest factors influencing safety behavior [15]. The authors conclude that interventions too often  
60  
397 rely on educational measures in order to change behavior and argue that using behavioral models  
398  
399 to design interventions may be more effective. Our results provide additional support for this  
400  
401 argument. We saw the strongest effects in perceived norms to reduce catheter use, suggesting  
that efforts aimed at changing organizational culture may be particularly effective. We would  
however argue that staff education and training can offer an important platform to disseminate and

1  
2  
3  
4 402 reinforce new norms and expectations, especially if they are used by clinical leaders to  
5  
6 403 demonstrate their commitment to the cause and to foster interprofessional collaboration.  
7

8 404 Promoting collaboration among nurses and physicians is especially important because urinary  
9  
10 405 catheter management is a strongly interprofessional topic and roles and responsibilities need to be  
11  
12 406 clear for all of the involved health care workers. In a previous study with data from the baseline  
13  
14 407 survey, we analyzed how nurses and physicians perceived their respective responsibilities for IUC  
15  
16 408 management [43]. We found that physicians mainly felt responsible for prescribing catheter  
17  
18 409 placement and removal, while nurses generally considered themselves responsible for placing,  
19  
20 410 managing and removing them. However, both nurses and physicians felt equally responsible for  
21  
22 411 assessing the need for continued catheterization. The results from the present study show that at  
23  
24 412 the end of the intervention, the perceived division of tasks between the two groups remained  
25  
26 413 largely the same. This could either indicate that because of the intervention bundle, both groups  
27  
28 414 were encouraged to assume responsibility in this area and interprofessional commitment was  
29  
30 415 strengthened. However, it could also mean that tasks especially in regard to the re-evaluation of  
31  
32 416 the need for a catheter were not clarified over the course of the project.

### 31 417 **Limitations**

32 418 This study has several limitations. We used the theory of planned behavior to model intention to  
33  
34 419 reduce urinary catheter use. However, it is not possible to know if changes observed in staff  
35  
36 420 perceptions led to a true change in practice. In a future study, staff survey data should be linked  
37  
38 421 with surveillance data on hospital-level to examine if specific changes in staff perceptions are  
39  
40 422 associated with changes in specific clinical outcomes. Direct observations of catheter placements  
41  
42 423 may be considered as another method to gain insight into compliance with protocols for safe  
43  
44 424 catheterization and changes in clinical practice [44]. This method was originally proposed to  
45  
46 425 participating hospitals in our project, but was rejected due to the additional resources required. For  
47  
48 426 practical purposes, we did not include a control group in the study design. The single-group design  
49  
50 427 does therefore not allow any causal inferences about the contribution of the intervention bundle on  
51  
52 428 the observed effects. It is possible that other secular trends or measures within the hospitals may  
53  
54 429 have affected the outcomes. A stepped wedge design could present an alternative to this design.  
55  
56 430 This design randomizes participating sites into sequential cohorts. All cohorts eventually implement  
57  
58 431 the intervention, each providing their own control data in the meantime and offering researchers  
59  
60 432 the chance to investigate implementation challenges and make adjustments along the way [45]. In  
433  
434  
435 addition, conducting focus groups or interviews with staff from each site could have provided a  
more in-depth understanding of staff perceptions after the intervention and the contextual factors  
that shape the implementation of a complex intervention in a new setting. The before/after study

1  
2  
3  
4 436 design does not allow us to evaluate sustainability of the intervention over time. A further follow-up  
5  
6 437 survey or a time-series approach could have shed more light on the long-term effects in the  
7  
8 438 hospitals. We chose to administer paper instead of electronic versions of the survey to minimize  
9  
10 439 coverage error because not all staff members in participating hospitals had access to individual e-  
11  
12 440 mail addresses. Furthermore, paper surveys have been shown to generate higher response rates  
13  
14 441 than surveys administered online [46]. With this method, we were able to attain reasonable  
15  
16 442 response rates at both survey periods. Since data collection was organized by local project teams,  
17  
18 443 however, we have no information on non-participants. It is possible that only highly motivated staff  
19  
20 444 members participated in the survey, which may result in more positive responses. The two survey  
21  
22 445 samples were comparable with respect to participants per hospital. For some of the socio-  
23  
24 446 demographic characteristics, notably profession and work unit, we found significant differences  
25  
26 447 between the two time periods. We cannot differentiate if this is due to selective non-responses or  
27  
28 448 staff fluctuation. Lastly, it is possible that only high performing units open to change have been  
29  
30 449 chosen to participate in the intervention project. This may limit generalizability of our findings to  
31  
32 450 other units and hospitals.

## 33 451 **Conclusion**

34 452 Changing staff attitudes, knowledge and behavior are important prerequisites for an effective  
35  
36 453 reduction of catheter use and catheter-associated complications. We found small, but significant  
37  
38 454 changes in staff perceptions after implementation of an evidence-based intervention bundle. The  
39  
40 455 positive trends were present in all subgroups, indicating that regardless of responsibilities and  
41  
42 456 practice of catheter placement, perspectives on urinary catheter use changed over time. Efforts  
43  
44 457 now need to be targeted at reinforcing and sustaining these changes, so that restrictive use of  
45  
46 458 IUCs becomes an integral part of the hospital culture.

47  
48 459 **Author contributions:** AN, SZ, JM, AS and DS contributed to the design of the study and the  
49  
50 460 survey instrument, SK und GJ contributed to the data collection. AN and DS analyzed the data. AN  
51  
52 461 and SZ drafted the manuscript, JM, AS, SK, GJ and DS critically revised the manuscript for  
53  
54 462 important intellectual content. All authors approved the manuscript.

55  
56 463 **Funding:** This work was supported by a grant from the Swiss Federal Office of Public Health [no.  
57  
58 464 15.011083].

59  
60 465 **Competing interests:** All authors report no conflicts of interest relevant to this article.

466 **Data sharing statement:** No additional data are available.

467

1  
2  
3  
4 468 **Figure legends**

5  
6 469 **Figure 1. Self-reported responsibilities in regard to urinary catheters by profession**

7  
8  
9 470 \* Change between time periods significant on  $p < 0.05$ .

10  
11 471

12  
13  
14 472 **Appendices**

15  
16 473 Appendix 1. List of indications for indwelling urinary catheters

17  
18 474 Appendix 2. Questionnaire

19  
20 475 Appendix 3. Knowledge: % correct answers provided per item at T0 and T1

21  
22 476 Appendix 4. Perception: mean and standard deviation per item at T0 and T1

23  
24 477 Appendix 5. Behavior: mean and standard deviation per item at T0 and T1

25  
26  
27  
28  
29  
30  
31  
32  
33  
34  
35  
36  
37  
38  
39  
40  
41  
42  
43  
44  
45  
46  
47  
48  
49  
50  
51  
52  
53  
54  
55  
56  
57  
58  
59  
60



478 **REFERENCES**

- 479 1. Jansen IA V, Hopmans TEM, Wille JC, Van Den Broek PJ, Van Der Kooi TII, Van Benthem  
480 BHB. Appropriate use of indwelling urethra catheters in hospitalized patients: Results of a  
481 multicentre prevalence study. *BMC Urol.* 2012;12:2–7.
- 482 2. Munasinghe R, Yazdani H, Siddique M, Hafeez W. Appropriateness of use of indwelling  
483 urinary catheters in patients admitted to the medical service. *Infect Control Hosp Epidemiol.*  
484 2001;22:647–9.
- 485 3. Saint S. Clinical and economic consequences of nosocomial catheter- related bacteriuria.  
486 *Am J Infect Control.* 2000;28:68–75.
- 487 4. Nicolle LE. Catheter associated urinary tract infections. *Antimicrob Resist Infect Control.*  
488 2014;3:1–8.
- 489 5. Hollingsworth JM, Rogers MAM, Krein SL, Hickner A, Kuhn L, Cheng A, et al. Determining  
490 the noninfectious complications of indwelling urethral catheters: a systematic review and  
491 meta-analysis. *Ann Intern Med.* 2013 Sep;159:401–10.
- 492 6. Lo E, Nicolle L, Classen D, Arias KM, Podgorny K, Anderson DJ, et al. Strategies to Prevent  
493 Catheter-Associated Urinary Tract Infections in Acute Care Hospitals. *Infect Control Hosp*  
494 *Epidemiol.* 2008;29:S41–50.
- 495 7. Gould C V., Umscheid CA, Agarwal RK, Kuntz G, Pegues DA. Guideline for Prevention of  
496 Catheter-Associated Urinary Tract Infections 2009. *Infect Control Hosp Epidemiol.*  
497 2010;31:319–26.
- 498 8. Saint S, Olmsted RN, Fakh MG, Kowalski CP, Watson SR, Sales AE, et al. Translating  
499 health care-associated urinary tract infection prevention research into practice via the  
500 bladder bundle. *Jt Comm J Qual Patient Saf.* 2009;35:449–55.
- 501 9. Fakh MG, George C, Edson BS, Goeschel CA, Saint S. Implementing a National Program  
502 to Reduce Catheter-Associated Urinary Tract Infection: A Quality Improvement  
503 Collaboration of State Hospital Associations, Academic Medical Centers, Professional  
504 Societies, and Governmental Agencies. *Infect Control Hosp Epidemiol.* 2013;34:1048–54.
- 505 10. Janzen J, Buurman BM, Spanjaard L, De Reijke TM, Goossens A, Geerlings SE. Reduction  
506 of unnecessary use of indwelling urinary catheters. *BMJ Qual Saf.* 2013;22:984–8.
- 507 11. Saint S, Greene MT, Krein SL, Rogers MAM, Ratz D, Fowler KE, et al. A Program to

- 1  
2  
3  
4 508 Prevent Catheter-Associated Urinary Tract Infection in Acute Care. *N Engl J Med.*  
5 2016;374:2111–9.  
6 509  
7  
8 510 12. Meddings J, Rogers MAM, Krein SL, Fakhri MG, Olmsted RN, Saint S. Reducing  
9 unnecessary urinary catheter use and other strategies to prevent catheter-associated  
10 511 urinary tract infection: An integrative review. *BMJ Qual Saf.* 2014;23:277–89.  
11 512  
12  
13 513 13. Saint S, Howell JD, Krein SL. Implementation science: how to jump-start infection  
14 514 prevention. *Infect Control Hosp Epidemiol.* 2010 Nov;31 Suppl 1:S14-7.  
15  
16  
17 515 14. Weaver SJ, Lubomksi LH, Wilson RF, Pfoh ER, Martinez KA, Dy SM. Promoting a culture of  
18 516 safety as a patient safety strategy: A systematic review. *Ann Intern Med.* 2013;158:369–74.  
19  
20  
21 517 15. Wakefield JG, McLaws M-L, Whitby M, Patton L. Patient safety culture: factors that influence  
22 518 clinician involvement in patient safety behaviours. *BMJ Qual Saf.* 2010;19:585–91.  
23  
24  
25 519 16. Meddings J, Reichert H, Todd Greene M, Safdar N, Krein SL, Olmsted RN, et al. Evaluation  
26 520 of the association between Hospital Survey on Patient Safety Culture (HSOPS) measures  
27 521 and catheter-associated infections: Results of two national collaboratives. *BMJ Qual Saf.*  
28 522 2017;26:226–35.  
29  
30  
31 523 17. Smith SN, Greene MT, Mody L, Banaszak-Holl J, Petersen LD, Meddings J. Evaluation of  
32 524 the association between Nursing Home Survey on Patient Safety culture (NHSOPS)  
33 525 measures and catheter-associated urinary tract infections: results of a national collaborative.  
34 526 *BMJ Qual Saf.* 2017;bmjqs-2017-006610.  
35  
36  
37 527 18. Paras ML, Shenoy ES, Hsu HE, Walensky RP, Hooper DC. Housestaff Knowledge Related  
38 528 to Urinary Catheter Use and Catheter-Associated Urinary Tract Infections. *Infect Control*  
39 529 *Hosp Epidemiol.* 2015 Nov;36:1355–7.  
40  
41  
42 530 19. Jain M, Dogra V, Mishra B, Thakur A, Loomba P. Knowledge and attitude of doctors and  
43 531 nurses regarding indication for catheterization and prevention of catheter-associated urinary  
44 532 tract infection in a tertiary care hospital. *Indian J Crit Care Med.* 2015;19:76.  
45  
46  
47 533 20. Viswanathan K, Rosen T, Mulcare MR, Clark S, Hayes J, Lachs MS, et al. Emergency  
48 534 Department Placement and Management of Indwelling Urinary Catheters in Older Adults:  
49 535 Knowledge, Attitudes, and Practice. *J Emerg Nurs.* 2015;41:414–22.  
50  
51  
52 536 21. Drekonja DM, Kuskowski MA, Johnson JR. Foley catheter practices and knowledge among  
53 537 Minnesota physicians. *Am J Infect Control.* 2010;38:694–700.  
54  
55  
56  
57  
58  
59  
60

- 1  
2  
3  
4 538 22. Drekonja DM, Kuskowski MA, Johnson JR. Internet survey of Foley catheter practices and  
5 539 knowledge among Minnesota nurses. *Am J Infect Control*. 2010;38:31–7.  
6  
7  
8 540 23. Mizerek E, Wolf L. To Foley or Not To Foley: Emergency Nurses' Perceptions of Clinical  
9 541 Decision Making in the Use of Urinary Catheters in the Emergency Department. *J Emerg*  
10 542 *Nurs*. 2015;41:329–34.  
11  
12  
13  
14 543 24. Marigliano A, Barbadoro P, Pennacchietti L, D'Errico MM, Prospero E. Active training and  
15 544 surveillance: 2 good friends to reduce urinary catheterization rate. *Am J Infect Control*.  
16 545 2012;40:692–5.  
17  
18  
19 546 25. Gray D, Nussle R, Cruz A, Kane G, Toomey M, Bay C, et al. Effects of a catheter-  
20 547 associated urinary tract infection prevention campaign on infection rate, catheter utilization,  
21 548 and health care workers' perspective at a community safety net hospital. *Am J Infect*  
22 549 *Control*. 2016;44:115–6.  
23  
24  
25  
26 550 26. Fakh MG, Rey JE, Pena ME, Szpunar S, Saravolatz LD. Sustained reductions in urinary  
27 551 catheter use over 5 years: Bedside nurses view themselves responsible for evaluation of  
28 552 catheter necessity. *Am J Infect Control*. 2013;41:236–9.  
29  
30  
31  
32 553 27. Riad-Allen L, Dermody SS, Herman Y, Bellissimo K, Selby P, George TP. Becoming  
33 554 tobacco-free: Changes in staff and patient attitudes and incident reports in a large academic  
34 555 mental health and addictions hospital. *Am J Addict*. 2017 Mar;26:183–91.  
35  
36  
37  
38 556 28. Mitchell BG, White N, Farrington A, Allen M, Page K, Gardner A, et al. Changes in  
39 557 knowledge and attitudes of hospital environmental services staff: The Researching Effective  
40 558 Approaches to Cleaning in Hospitals (REACH) study. *Am J Infect Control*. 2018;0–5.  
41  
42  
43 559 29. Laur C V., Keller HH, Curtis L, Douglas P, Murphy J, Ray S. Comparing Hospital Staff  
44 560 Nutrition Knowledge, Attitudes, and Practices Before and 1 Year After Improving Nutrition  
45 561 Care: Results From the More-2-Eat Implementation Project. *J Parenter Enter Nutr*.  
46 562 2017;42:014860711771849.  
47  
48  
49  
50 563 30. Yurek LA, Vasey J, Havens DS. The Use of Self-Generated Identification Codes in  
51 564 Longitudinal Research. *Eval Rev*. 2010;32:435–52.  
52  
53  
54 565 31. Züllig S, Mascherek A. Sicherheit bei Blasenkathetern. Empfehlungen im Rahmen des  
55 566 nationalen Pilotprogramms progress! Sicherheit bei Blasenkathetern. Zürich: Stiftung für  
56 567 Patientensicherheit; 2016.  
57  
58  
59  
60

- 1  
2  
3  
4 568 32. Schweiger A, Kuster S, Maag J, Züllig S, Bertschy S, Bortolin E, et al. Impact of an  
5 evidence-based intervention on urinary catheter utilization, associated process indicators,  
6 569 and infectious and non-infectious outcomes. 2019; Manuscript submitted for publication.  
7 570  
8  
9  
10 571 33. Mascherek AC, Schwappach DLB, Bezzola P. Frequency of use and knowledge of the  
11 572 WHO-surgical checklist in Swiss hospitals: A cross-sectional online survey. *Patient Saf*  
12 573 *Surg.* 2013;7:1–7.
- 15 574 34. Mascherek AC, Gehring K, Bezzola P, Schwappach DLB. Using the theory of planned  
16 575 behaviour to model antecedents of surgical checklist use: a cross-sectional study. *BMC*  
17 576 *Health Serv Res.* 2015;15:462.
- 21 577 35. Ajzen I. The theory of planned behavior. *Organ Behav Hum Decis Process.* 1991;50:179–  
22 578 211.
- 25 579 36. Ajzen I, Manstead ASR. Changing health-related behaviours: An approach based on the  
26 580 Theory of Planned Behaviour. In: Hewstone M, Schut H, de Wit J, Van Den Bos K, Stroebe  
27 581 M, editors. *The scope of social psychology: Theory and applications.* New York: Psychology  
28 582 Press; 2007. p. 43–63.
- 32 583 37. Dunlap WP, Cortina JM, Vaslow JB, Burke MJ. Meta-analysis of experiments with matched  
33 584 groups or repeated measures designs. *Psychol Methods.* 1996;1:170–7.
- 36 585 38. Lakens D. Calculating and reporting effect sizes to facilitate cumulative science: a practical  
37 586 primer for t-tests and ANOVAs. *Front Psychol.* 2013;4:1–12.
- 40 587 39. de Jager E, Gunnarsson R, Ho YH. Implementation of the World Health Organization  
41 588 Surgical Safety Checklist Correlates with Reduced Surgical Mortality and Length of Hospital  
42 589 Admission in a High-Income Country. *World J Surg.* 2019;43:117–24.
- 45 590 40. Berry WR, Edmondson L, Gibbons LR, Childers AK, Haynes AB, Foster R, et al. Scaling  
46 591 safety: The south carolina surgical safety checklist experience. *Health Aff.* 2018;37:1779–  
47 592 86.
- 51 593 41. Dixon-Woods M, Martin GP. Does quality improvement improve quality? *Futur Hosp J.*  
52 594 2016;3:191–4.
- 55 595 42. Böhmer AB, Kindermann P, Schwanke U, Bellendir M, Tinschmann T, Schmidt C, et al.  
56 596 Long-term effects of a perioperative safety checklist from the viewpoint of personnel. *Acta*  
57 597 *Anaesthesiol Scand.* 2013;57:150–7.

- 1  
2  
3  
4 598 43. Niederhauser A, Züllig S, Marschall J, Schwappach DLB, Progress! C group. Nurses' and  
5 599 Physicians' Perceptions of Indwelling Urinary Catheter Practices and Culture in Their  
6 600 Institutions. *J Patient Saf.* 2018;00:1–8.
- 9  
10 601 44. Galiczewski JM, Shurpin KM. An intervention to improve the catheter associated urinary  
11 602 tract infection rate in a medical intensive care unit: Direct observation of catheter insertion  
12 603 procedure. *Intensive Crit Care Nurs.* 2017;40:26–34.
- 15 604 45. Burke RE, Shojanian KG. Rigorous evaluations of evolving interventions: Can we have our  
16 605 cake and eat it too? *BMJ Qual Saf.* 2018;27:251–4.
- 19 606 46. Dykema J, Jones NR, Piché T, Stevenson J. Surveying Clinicians by Web: Current Issues in  
20 607 Design and Administration. *Eval Heal Prof.* 2013;36:352–81.

608

609

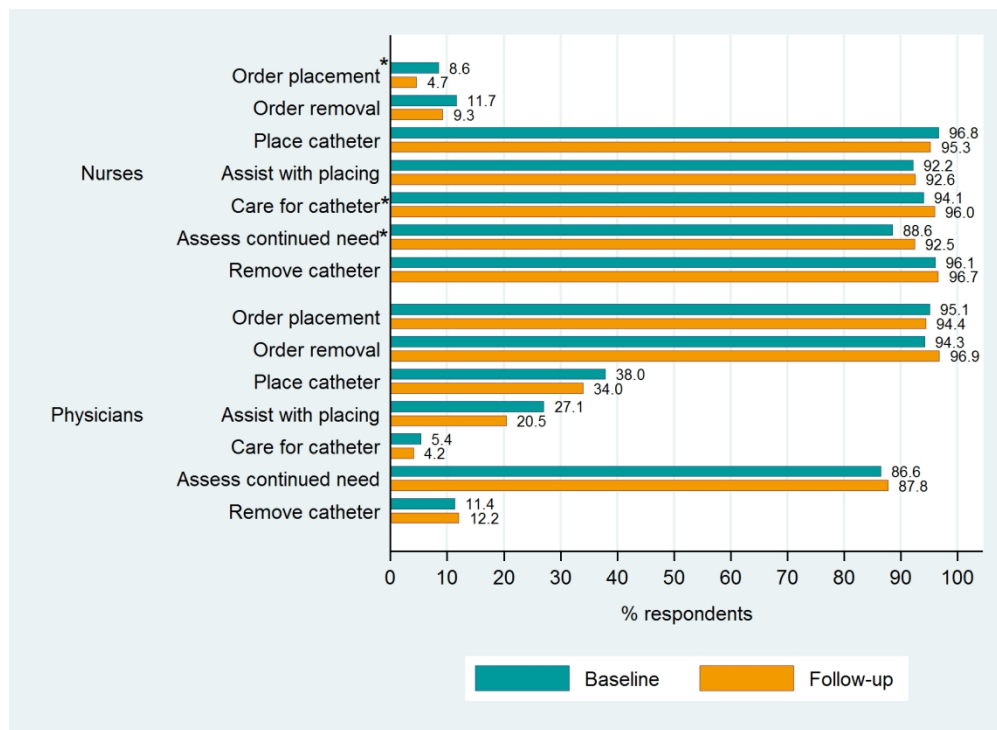

Figure 1. Self-reported responsibilities in regard to urinary catheters by profession

152x110mm (300 x 300 DPI)

## Appendix 1. List of indications for indwelling urinary catheters

Note: This list does not cover urological emergencies. Treatment for these cases is decided by the urologist.

No indications for a urinary catheter are:

Asymptomatic chronic urinary retention

Urine output monitoring / fluid monitoring for stable patients, if daily weight control is possible

Need for intensive care

Urinary incontinence

Immobilization, as long as alternative methods<sup>1</sup> for controlled bladder drainage have not been exhausted

Comfort from the perspective of the patient (or their trusted representative) OR from the perspective of staff

| Indication                        | Specification                                                                                                                                                                                                                                                                               |
|-----------------------------------|---------------------------------------------------------------------------------------------------------------------------------------------------------------------------------------------------------------------------------------------------------------------------------------------|
| Urinary retention                 | Acute urinary retention of any origin<br>Symptomatic chronic outflow obstruction PLUS >300 ml residual urine                                                                                                                                                                                |
| Urine output monitoring           | In regular, short intervals (hourly or as defined by hospital) PLUS direct therapeutic consequences from monitoring, if body weight of patient cannot be measured                                                                                                                           |
| Surgery                           | Long surgery (>4h)<br>Perioperative: for surgical reasons, if bladder has to be empty. Catheter is to be removed at the end of the surgery<br>Urogenital surgery and/or pelvic floor surgery<br>Epidural / peridural anesthesia/analgesia                                                   |
| Pressure ulcers PLUS incontinence | Pressure ulcers stage III or IV, or sacral/perineal skin transplants PLUS incontinence, if alternative methods <sup>1</sup> for controlled bladder drainage failed                                                                                                                          |
| Prolonged immobilization          | Immobilization for medical reasons, especially for pain reduction, if alternative methods <sup>1</sup> for controlled bladder drainage failed                                                                                                                                               |
| Palliation PLUS Comfort           | Terminal-palliative situation PLUS dysfunction of bladder PLUS/OR difficulties with normal voiding, if alternative methods <sup>1</sup> for controlled bladder drainage failed<br>Severe psychological strain PLUS at the request of the informed patient (or their trusted representative) |

<sup>1</sup> Alternative methods are: condom catheter, urinal, bedpan, bedside commode, incontinence pads, pants

List was translated for this publication by the authors.

## Appendix 2. Questionnaire

---

### Personal ID

First we ask you to create a personal identification number (ID). As part of the program progress! Safe urinary catheterization, you will complete questionnaires at two different points in time. This ID will help us match the two different questionnaires to one person, and to recognize the information coming from one and the same person. At the same time, the ID protects your anonymity, as you cannot be personally identified. This is how you create your personal ID:

The ID consists of your mother's initials (maiden name), your father's initials and your mother's birth year. Example: Mother: Hannah Kaufmann, Father: Peter Muller, Mothers birth year: 1931 → ID: HKPM1931

### Part 1 (correct answers provided in parentheses)

#### Please estimate:

How many patients in Switzerland receive a catheter during their hospital stay?  
(10-25%)

#### Please indicate if the following statements are correct:

After 30 catheter-days, nearly all patients show bacteriuria. (correct)

The duration of catheterization is an important risk factor for the development of a urinary tract infection. (correct)

Most hospital-acquired urinary tract infections are associated with a urinary catheter. (correct)

Single-use urinary catheters carry a higher risk for infections as compared to indwelling catheters. (false)

A closed drainage system is essential for the prevention of catheter-associated urinary tract infections. (correct)

Compared to catheters, non-invasive methods for bladder draining (e.g., condom catheters, incontinence pads) have the advantage that they do not carry a risk for injuries. (correct)

Non-infectious complications (e.g., injuries or allergic reactions) only occur in absolutely rare instances during catheterization. (false)

The choice of an antiseptic for disinfecting the urethral meatus does not affect the correct asepsis when inserting a catheter. (false)

Up to 50 percent of catheters placed in an emergency department are not medically justified. (correct)

One effective measure to prevent catheter-associated urinary tract infections is to change catheters or drainage bags in regular intervals. (false)

#### In which of these situations is the placement of a urinary catheter indicated?

To monitor urine output in stable patients who can be weighed. (not indicated)

In case of distress at the request of a terminally ill patient. (indicated)

For patients requiring intensive care. (not indicated)

For patients with restricted mobility. (not indicated)

### Part 2

#### Please indicate if you agree with the following statements:<sup>1</sup>

On my unit, IUCs are placed only as clearly indicated medical measure.

For medical leadership on my unit, restrictive use of IUCs is very important.

For nursing leadership on my unit, restrictive use of IUCs is very important.

Nursing workload plays an important role when a decision for placing an IUC is made.

People in charge on my unit make sure that everyone placing IUCs is sufficiently trained for this task.

Whenever possible, staff on my unit tries to use alternatives to an IUC (e.g., condom catheters, incontinence pads).



1  
2  
3 The daily assessment to evaluate if an IUC is still needed is a given for us.

4 Basic infection prevention measures are well complied with during placement and care of  
5 IUCs.

6 If someone needs help when placing an IUC, it is clear on my unit who can be contacted.

7 Medical and nursing staff on my unit have a similar attitude concerning the use of IUCs.

8 For staff members on my unit, it is a matter of course to openly question the placement of an  
9 IUC.

10 It is difficult on my unit to speak up when rules of hygiene are broken during placement and  
11 care of an IUC.

12 It is common on my unit that, whenever possible, two healthcare workers work together to  
13 place a catheter.

### 14 **Part 3**

15 **What is your own role regarding the use of catheters? Please select all answers that  
16 apply.**

17 It is part of my responsibility to...

18 ...write orders for IUC placement

19 ...write orders for IUC removal

20 ...place an IUC

21 ...assist another professional with placing an IUC

22 ...care for an indwelling catheter

23 ...assess the continued need for an IUC

24 ...remove an IUC

### 25 **Part 4**

26 **Please indicate if you agree with the following statements:<sup>1</sup>**

27 I can properly estimate in which situations the use of an IUC is appropriate.

28 My colleagues appreciate my commitment to reduce the use of IUCs.

29 I can influence the use of IUCs in my daily work.

30 The risk from IUCs for patients is underestimated.

31 I find it difficult in my daily work to reduce the use of IUCs.

32 In my hospital I am expected to contribute to the reduction of IUCs.

33 I am convinced that I am proficient in caring for an indwelling catheter.

34 I am convinced that by reducing the use of IUCs, adverse events to patients can be avoided.

35 Our patients appreciate it when IUCs are avoided.

36 A reduced use of IUCs makes patient care more stressful for me.

37 My supervisors expect that everyone follows the internal protocols for inserting catheters.

38 I am convinced that I am proficient in inserting a urinary catheter.

39 I think that it's important to reduce the use of IUCs in the hospital.

40 My supervisors expect me to reduce the use of IUCs.

41 I am confident that I can reduce the use of IUCs in everyday work.

### 42 **Part 5 (response categories in parentheses)**

43 How old are you?

44 Gender (female, male)

45 In which professional role are you currently working?

46 (surgical positioning specialist, healthcare assistant, registered nurse, nursing manager,  
47 physician resident, attending physician, senior physician, chief physician, other)

48 How long have you been working in this hospital? (< 2 years, 2 to < 5 years, 5 to < 10 years,  
49 10 to < 20 years, ≥ 20 years)

50 How many working hours do you spend in patient care during a typical working week? (less  
51 than 10 hours, between 10-24 hours, between 25-39 hours, 40 hours or more)

1  
2  
3 How often have you placed a urinary catheter throughout your professional career  
4 (estimate)? (never, 1-5 times, 6-20 times, > 20 times)

5 How often do you place a urinary catheter in your current position (estimate)?

6 (never, rarely (a few times a year), sometimes (a few times a month), often (a few times a  
7 week))

8 Where have you primarily been working in the past three months?

9 (ward, emergency department, intensive care unit, operating room, other)

10 In which medical area do you work primarily?

11 (Anesthesiology, Surgery, Obstetrics/Gynecology, Internal medicine, Neurology, orthopedics,  
12 Radiology, Urology, in several medical areas, other)

13 Do you have additional any additional comments?

14  
15 **Items only included at T<sub>1</sub>**

16 Are you familiar with the indication list that has been implemented as part of the program  
17 “progress! Safe urinary catheterization“? (yes, no)

18 Have you participated at a training as part of the program “progress! Safe urinary  
19 catheterization“?

20 - Theoretical training (yes, no)

21 - Practical training (yes, no)

22 How do you evaluate the participation of your unit in the program “progress! Safe urinary  
23 catheterization“? (very positive, rather positive, neutral, rather negative, very negative, don't  
24 know the program)

25  
26  
27  
28 Items translated from German original by the authors.

29 <sup>1</sup> Items were answered on a Likert-scale from 1 (do not agree at all) to 7 (completely agree)

**Appendix 3. Knowledge – % correct answers provided per item**

|                                                                                                                                                                                       | % T <sub>0</sub><br>n = 1,579 | % T <sub>1</sub><br>n = 1,527 |
|---------------------------------------------------------------------------------------------------------------------------------------------------------------------------------------|-------------------------------|-------------------------------|
| <b>Please estimate:</b>                                                                                                                                                               |                               |                               |
| How many patients in Switzerland receive a catheter during their hospital stay? (10-25%)                                                                                              | 37.6                          | 39.1                          |
| <b>Please indicate if the following statements are correct:</b>                                                                                                                       |                               |                               |
| After 30 catheter-days, nearly all patients show bacteriuria. (correct)                                                                                                               | 81.6                          | 86.9                          |
| The duration of catheterization is an important risk factor for the development of a urinary tract infection. (correct)                                                               | 98.0                          | 98.9                          |
| Most hospital-acquired urinary tract infections are associated with a urinary catheter. (correct)                                                                                     | 82.2                          | 86.3                          |
| Single-use urinary catheters carry a higher risk for infections as compared to indwelling catheters. (false)                                                                          | 89.9                          | 91.9                          |
| A closed drainage system is essential for the prevention of catheter-associated urinary tract infections. (correct)                                                                   | 77.4                          | 82.0                          |
| Compared to catheters, non-invasive methods for bladder draining (e.g., condom catheters, incontinence pads) have the advantage that they do not carry a risk for injuries. (correct) | 62.4                          | 69.0                          |
| Non-infectious complications (e.g., injuries or allergic reactions) only occur in absolutely rare instances during catheterization. (false)                                           | 61.2                          | 68.8                          |
| The choice of an antiseptic for disinfecting the urethral meatus does not affect the correct asepsis when inserting a catheter. (false)                                               | 80.6                          | 82.6                          |
| Up to 50 percent of catheters placed in an emergency department are not medically justified. (correct)                                                                                | 61.4                          | 73.8                          |
| One effective measure to prevent catheter-associated urinary tract infections is to change catheters or drainage bags in regular intervals. (false)                                   | 30.4                          | 36.2                          |
| <b>In which of these situations is the placement of a urinary catheter indicated?</b>                                                                                                 |                               |                               |
| To monitor urine output in stable patients who can be weighed. (not indicated)                                                                                                        | 97.5                          | 98.1                          |
| In case of distress at the request of a terminally ill patient. (indicated)                                                                                                           | 93.3                          | 93.2                          |
| For patients requiring intensive care. (not indicated)                                                                                                                                | 21.2                          | 32.3                          |
| For patients with restricted mobility. (not indicated)                                                                                                                                | 79.9                          | 81.4                          |

Correct answers for knowledge items are provided in parentheses. Items were translated for this publication by the authors. Sample size differs slightly for each item due to a varying number of missing values.

#### Appendix 4. Perception of practices and culture – Mean and standard deviation per item

|                                                                                                                      | Mean T <sub>0</sub><br>(SD)<br>n = 1,579 | Mean T <sub>1</sub><br>(SD)<br>n = 1,527 | p-value |
|----------------------------------------------------------------------------------------------------------------------|------------------------------------------|------------------------------------------|---------|
| On my unit, IUCs are placed only as clearly indicated medical measure.                                               | 5.5 (1.4)                                | 5.7 (1.3)                                | <0.001  |
| For medical leadership on my unit, restrictive use of IUCs is very important.                                        | 5.1 (1.6)                                | 5.4 (1.4)                                | <0.001  |
| For nursing leadership on my unit, restrictive use of IUCs is very important.                                        | 5.1 (1.5)                                | 5.7 (1.3)                                | <0.001  |
| Nursing workload plays an important role when a decision for placing an IUC is made.                                 | 2.8 (1.8)                                | 2.5 (1.6)                                | <0.001  |
| People in charge on my unit make sure that everyone placing IUCs is sufficiently trained for this task.              | 5.4 (1.7)                                | 5.6 (1.5)                                | <0.001  |
| Whenever possible, staff on my unit tries to use alternatives to an IUC (e.g., condom catheters, incontinence pads). | 4.7 (1.8)                                | 5.1 (1.7)                                | <0.001  |
| The daily assessment to evaluate if an IUC is still needed is a given for us.                                        | 5.3 (1.6)                                | 5.6 (1.5)                                | <0.001  |
| Basic infection prevention measures are well complied with during placement and care of IUCs.                        | 6.0 (1.1)                                | 6.1 (1.0)                                | 0.0219  |
| If someone needs help when placing an IUC, it is clear on my unit who can be contacted.                              | 5.8 (1.5)                                | 5.9 (1.4)                                | 0.2649  |
| Medical and nursing staff on my unit have a similar attitude concerning the use of IUCs.                             | 5.1 (1.4)                                | 5.3 (1.4)                                | 0.0016  |
| For staff members on my unit, it is a matter of course to openly question the placement of an IUC.                   | 5.5 (1.4)                                | 5.7 (1.2)                                | <0.001  |
| It is difficult on my unit to speak up when rules of hygiene are broken during placement and care of an IUC.         | 2.9 (1.7)                                | 2.8 (1.6)                                | 0.0358  |
| It is common on my unit that, whenever possible, two healthcare workers work together to place a catheter.           | 5.0 (1.9)                                | 5.2 (1.7)                                | <0.001  |

Items were translated for this publication by the authors. Sample size differs slightly for each item due to a varying number of missing values.

## Appendix 5. Determinants of personal behavior – Mean and standard deviation per item

|                                                                                             | Mean T <sub>0</sub><br>(SD)<br>n = 1,579 | Mean T <sub>1</sub><br>(SD)<br>n = 1,527 | p-value |
|---------------------------------------------------------------------------------------------|------------------------------------------|------------------------------------------|---------|
| <b>Perceived behavioral control</b>                                                         |                                          |                                          |         |
| I can properly estimate in which situations the use of an IUC is appropriate.               | 6.1 (1.0)                                | 6.1 (1.0)                                | 0.2587  |
| I can influence the use of IUCs in my daily work.                                           | 5.5 (1.4)                                | 5.7 (1.4)                                | 0.0004  |
| I am convinced that I am proficient in caring for an indwelling catheter.                   | 5.5 (1.6)                                | 5.6 (1.6)                                | 0.0343  |
| I am convinced that I am proficient in inserting a urinary catheter.                        | 5.7 (1.5)                                | 5.7 (1.4)                                | 0.5490  |
| I am confident that I can reduce the use of IUCs in everyday work.                          | 5.0 (1.5)                                | 5.5 (1.4)                                | <0.001  |
| <b>Subjective Norms</b>                                                                     |                                          |                                          |         |
| My colleagues appreciate my commitment to reduce the use of IUCs.                           | 5.1 (1.5)                                | 5.4 (1.4)                                | <0.001  |
| In my hospital I am expected to contribute to the reduction of IUCs.                        | 4.6 (1.8)                                | 5.7 (1.5)                                | <0.001  |
| Our patients appreciate it when IUCs are avoided.                                           | 5.5 (1.4)                                | 5.6 (1.4)                                | 0.0442  |
| My supervisors expect that everyone follows the internal protocols for inserting catheters. | 6.0 (1.2)                                | 6.1 (1.2)                                | 0.0125  |
| My supervisors expect me to reduce the use of IUCs.                                         | 4.5 (1.7)                                | 5.5 (1.5)                                | <0.001  |
| <b>Attitudes</b>                                                                            |                                          |                                          |         |
| The risk from IUCs for patients is underestimated.                                          | 5.1 (1.6)                                | 5.0 (1.8)                                | 0.0044  |
| I find it difficult in my daily work to reduce the use of IUCs.                             | 3.7 (1.7)                                | 3.3 (1.6)                                | <0.001  |
| I am convinced that by reducing the use of IUCs, adverse events to patients can be avoided. | 5.8 (1.3)                                | 6.1 (1.1)                                | <0.001  |
| A reduced use of IUCs makes patient care more stressful for me.                             | 3.0 (1.8)                                | 2.9 (1.7)                                | 0.0045  |
| I think that it's important to reduce the use of IUCs in the hospital.                      | 5.7 (1.3)                                | 6.0 (1.2)                                | <0.001  |

Items were translated for this publication by the authors. Items are presented according to their construct (perceived behavioral control, subjective norm and attitudes). In the questionnaire, order of the items was randomized. Sample size differs slightly for each item due to a varying number of missing values.

**STROBE 2007 (v4) Statement—Checklist of items that should be included in reports of *cross-sectional studies***

| Section/Topic                | Item # | Recommendation                                                                                                                                                                       | Reported on page # |
|------------------------------|--------|--------------------------------------------------------------------------------------------------------------------------------------------------------------------------------------|--------------------|
| Title and abstract           | 1      | (a) Indicate the study's design with a commonly used term in the title or the abstract                                                                                               | title page         |
|                              |        | (b) Provide in the abstract an informative and balanced summary of what was done and what was found                                                                                  | p.2                |
| <b>Introduction</b>          |        |                                                                                                                                                                                      |                    |
| Background/rationale         | 2      | Explain the scientific background and rationale for the investigation being reported                                                                                                 | p.3-4              |
| Objectives                   | 3      | State specific objectives, including any prespecified hypotheses                                                                                                                     | p.3-4              |
| <b>Methods</b>               |        |                                                                                                                                                                                      |                    |
| Study design                 | 4      | Present key elements of study design early in the paper                                                                                                                              | p.5                |
| Setting                      | 5      | Describe the setting, locations, and relevant dates, including periods of recruitment, exposure, follow-up, and data collection                                                      | p.4 & p.5          |
| Participants                 | 6      | (a) Give the eligibility criteria, and the sources and methods of selection of participants                                                                                          | p.5 & p.6          |
| Variables                    | 7      | Clearly define all outcomes, exposures, predictors, potential confounders, and effect modifiers. Give diagnostic criteria, if applicable                                             | p.5-6              |
| Data sources/<br>measurement | 8*     | For each variable of interest, give sources of data and details of methods of assessment (measurement). Describe comparability of assessment methods if there is more than one group | N/A                |
| Bias                         | 9      | Describe any efforts to address potential sources of bias                                                                                                                            | N/A                |
| Study size                   | 10     | Explain how the study size was arrived at                                                                                                                                            | p.6                |
| Quantitative variables       | 11     | Explain how quantitative variables were handled in the analyses. If applicable, describe which groupings were chosen and why                                                         | p.6-7              |
| Statistical methods          | 12     | (a) Describe all statistical methods, including those used to control for confounding                                                                                                | p.6-7              |
|                              |        | (b) Describe any methods used to examine subgroups and interactions                                                                                                                  | p.6-7              |
|                              |        | (c) Explain how missing data were addressed                                                                                                                                          | p.6-7              |
|                              |        | (d) If applicable, describe analytical methods taking account of sampling strategy                                                                                                   | N/A                |
|                              |        | (e) Describe any sensitivity analyses                                                                                                                                                | N/A                |

|                          |     |                                                                                                                                                                                                              |               |
|--------------------------|-----|--------------------------------------------------------------------------------------------------------------------------------------------------------------------------------------------------------------|---------------|
| <b>Results</b>           |     |                                                                                                                                                                                                              |               |
| Participants             | 13* | (a) Report numbers of individuals at each stage of study—eg numbers potentially eligible, examined for eligibility, confirmed eligible, included in the study, completing follow-up, and analysed            | p.7           |
|                          |     | (b) Give reasons for non-participation at each stage                                                                                                                                                         | N/A           |
|                          |     | (c) Consider use of a flow diagram                                                                                                                                                                           | N/A           |
| Descriptive data         | 14* | (a) Give characteristics of study participants (eg demographic, clinical, social) and information on exposures and potential confounders                                                                     | p.8 (table 1) |
|                          |     | (b) Indicate number of participants with missing data for each variable of interest                                                                                                                          | p.8 (table 1) |
| Outcome data             | 15* | Report numbers of outcome events or summary measures                                                                                                                                                         | p.9-11        |
| Main results             | 16  | (a) Give unadjusted estimates and, if applicable, confounder-adjusted estimates and their precision (eg, 95% confidence interval). Make clear which confounders were adjusted for and why they were included | N/A           |
|                          |     | (b) Report category boundaries when continuous variables were categorized                                                                                                                                    | N/A           |
|                          |     | (c) If relevant, consider translating estimates of relative risk into absolute risk for a meaningful time period                                                                                             | N/A           |
| Other analyses           | 17  | Report other analyses done—eg analyses of subgroups and interactions, and sensitivity analyses                                                                                                               | p.9           |
| <b>Discussion</b>        |     |                                                                                                                                                                                                              |               |
| Key results              | 18  | Summarise key results with reference to study objectives                                                                                                                                                     | p.11-13       |
| Limitations              | 19  | Discuss limitations of the study, taking into account sources of potential bias or imprecision. Discuss both direction and magnitude of any potential bias                                                   | p.13-14       |
| Interpretation           | 20  | Give a cautious overall interpretation of results considering objectives, limitations, multiplicity of analyses, results from similar studies, and other relevant evidence                                   | p.14          |
| Generalisability         | 21  | Discuss the generalisability (external validity) of the study results                                                                                                                                        | p.13          |
| <b>Other information</b> |     |                                                                                                                                                                                                              |               |
| Funding                  | 22  | Give the source of funding and the role of the funders for the present study and, if applicable, for the original study on which the present article is based                                                | p14           |

\*Give information separately for cases and controls in case-control studies and, if applicable, for exposed and unexposed groups in cohort and cross-sectional studies.

**Note:** An Explanation and Elaboration article discusses each checklist item and gives methodological background and published examples of transparent reporting. The STROBE checklist is best used in conjunction with this article (freely available on the Web sites of PLoS Medicine at <http://www.plosmedicine.org/>, Annals of Internal Medicine at <http://www.annals.org/>, and Epidemiology at <http://www.epidem.com/>). Information on the STROBE Initiative is available at [www.strobe-statement.org](http://www.strobe-statement.org).

# BMJ Open

## Change in staff perspectives on indwelling urinary catheter use after implementation of an intervention bundle in seven Swiss acute care hospitals: Results of a before/after survey study

|                                 |                                                                                                                                                                                                                                                                                                                                                                                                                                                                                                                                                                                                                                                                                                                                                                                                                                                          |
|---------------------------------|----------------------------------------------------------------------------------------------------------------------------------------------------------------------------------------------------------------------------------------------------------------------------------------------------------------------------------------------------------------------------------------------------------------------------------------------------------------------------------------------------------------------------------------------------------------------------------------------------------------------------------------------------------------------------------------------------------------------------------------------------------------------------------------------------------------------------------------------------------|
| Journal:                        | <i>BMJ Open</i>                                                                                                                                                                                                                                                                                                                                                                                                                                                                                                                                                                                                                                                                                                                                                                                                                                          |
| Manuscript ID                   | bmjopen-2018-028740.R2                                                                                                                                                                                                                                                                                                                                                                                                                                                                                                                                                                                                                                                                                                                                                                                                                                   |
| Article Type:                   | Original research                                                                                                                                                                                                                                                                                                                                                                                                                                                                                                                                                                                                                                                                                                                                                                                                                                        |
| Date Submitted by the Author:   | 18-Sep-2019                                                                                                                                                                                                                                                                                                                                                                                                                                                                                                                                                                                                                                                                                                                                                                                                                                              |
| Complete List of Authors:       | Niederhauser, Andrea; Swiss Patient Safety Foundation<br>Züllig, Stephanie; Swiss Patient Safety Foundation<br>Marschall, Jonas; Swissnos National Center for Infection Control; Bern University Hospital, Department of Infectious Diseases<br>Schweiger, Alexander; Swissnos National Center for Infection Control; Basel University Hospital, Department of Infectious Diseases and Hospital Epidemiology<br>John, Gregor; Hopital neuchatelois, Department of Internal Medicine<br>Kuster, Stefan; Swissnos National Center for Infection Control; University and University Hospital Zurich, Division of Infectious Diseases and Hospital Epidemiology<br>Schwappach, David; Swiss Patient Safety Foundation; University of Bern, Institute of Social and Preventive Medicine (ISPM)<br>Safe urinary catheterization collaboration group, progress! |
| <b>Primary Subject Heading</b>: | Health services research                                                                                                                                                                                                                                                                                                                                                                                                                                                                                                                                                                                                                                                                                                                                                                                                                                 |
| Secondary Subject Heading:      | Infectious diseases                                                                                                                                                                                                                                                                                                                                                                                                                                                                                                                                                                                                                                                                                                                                                                                                                                      |
| Keywords:                       | Patient Safety, indwelling urinary catheter, survey, intervention bundle, perception                                                                                                                                                                                                                                                                                                                                                                                                                                                                                                                                                                                                                                                                                                                                                                     |
|                                 |                                                                                                                                                                                                                                                                                                                                                                                                                                                                                                                                                                                                                                                                                                                                                                                                                                                          |

SCHOLARONE™  
Manuscripts



1  
2  
3  
4 **1 Change in staff perspectives on indwelling urinary catheter use after implementation of an**  
5 **2 intervention bundle in seven Swiss acute care hospitals: Results of a before/after survey**  
6 **3 study**  
7

8 4 Running title: Change in staff perspectives  
9

10 5 Andrea Niederhauser MPH<sup>1</sup>

11 6 Stephanie Züllig PhD<sup>1</sup>

12 7 Jonas Marschall MD<sup>2,3</sup>

13 8 Alexander Schweiger MD<sup>2,4</sup>

14 9 Gregor John MD<sup>5</sup>

15 10 Stefan P Kuster MD<sup>2,6</sup>

16 11 David LB Schwappach PhD<sup>1,7</sup>

17 12 and progress! Safe urinary catheterization collaboration group  
18  
19

20 14 1 Swiss Patient Safety Foundation, Zurich, Switzerland

21 15 2 Swissnos National Center for Infection Control, Bern, Switzerland

22 16 3 Department of Infectious Diseases, Bern University Hospital, Bern, Switzerland

23 17 4 Department of Infectious Diseases and Hospital Epidemiology, Basel University Hospital,  
24 18 Basel, Switzerland

25 19 5 Department of Internal Medicine, Hôpital neuchâtelois, Neuchâtel, Switzerland

26 20 6 Division of Infectious Diseases and Hospital Epidemiology, University and University Hospital  
27 21 Zurich, Zurich, Switzerland

28 22 7 Institute of Social and Preventive Medicine (ISPM), University of Bern, Bern, Switzerland  
29  
30

31 24 progress! Safe urinary catheterization collaboration group\*:

32 25 • Adriana Degiorgi (Ente Ospedaliero Cantonale, Lugano Civico)

33 26 • Thomas Bregenzer (Spital Lachen)

34 27 • Stefan P Kuster (University and University Hospital Zurich)

35 28 • Marianne Laguardia (Inselspital Universitätsspital Bern)

36 29 • Isabelle Montavon-Blondet (Hôpital neuchâtelois)

37 30 • Jasmin Perret (Kantonsspital Winterthur)

38 31 • Vineeta Bansal (Kantonsspital Winterthur)

39 32 • Anja Waltenspül (Luzerner Kantonsspital)

40 33 • Sonja Bertschy (Luzerner Kantonsspital)

41 34 \*non-author contributors  
42  
43

44 36 Corresponding author:

45 37 Andrea Niederhauser

46 38 Asylstrasse 77

47 39 CH-8032 Zurich

48 40 Phone: +41 43 244 14 80

49 41 Fax: +41 43 244 14 81

50 42 E-mail: niederhauser@patientensicherheit.ch  
51  
52  
53

54 44 Word count abstract: 248

55 45 Word count manuscript: 3772 words

56 46 Key words: indwelling urinary catheter, survey, patient safety, perception, intervention bundle  
57  
58  
59  
60

1  
2  
3  
4 47 **Abstract**

5  
6  
7 48 **Objective:** To evaluate changes in staff perspectives towards indwelling urinary catheter (IUC) use  
8 49 after implementation of a one-year quality improvement project.

9  
10  
11 50 **Design:** Repeated cross-sectional survey at baseline (October 2016) and 12-month follow-up  
12 51 (October 2017).

13  
14  
15 52 **Setting:** Seven acute care hospitals in Switzerland

16  
17 53 **Participants:** The survey was targeted at all nursing and medical staff members working at the  
18 54 participating hospitals at the time of survey distribution. A total of 1,579 staff members participated  
19 55 in the baseline survey (49% response rate) and 1,527 participated in the follow-up survey (47%  
20 56 response rate).

21  
22  
23  
24 57 **Intervention:** A multimodal intervention bundle, consisting of an evidence-based indication list,  
25 58 daily re-evaluation of ongoing catheter need and staff training, was implemented over the course of  
26 59 9 months.

27  
28  
29  
30 60 **Main Outcome Measures:** Staff knowledge (15 items), perception of current practices and culture  
31 61 (scale 1-7), self-reported responsibilities (multiple-response question) and determinants of  
32 62 behavior (scale 1-7) before and after implementation of the intervention bundle.

33  
34  
35 63 **Results:** The mean number of correctly answered knowledge questions increased significantly  
36 64 between the two survey periods ( $T_0$ : 10.4,  $T_1$ : 11.0,  $p < 0.001$ ). Self-reported responsibilities with  
37 65 regard to IUC management by nurses and physicians changed only slightly over time. Perception  
38 66 of current practices and culture in regard to safe urinary catheter use increased significantly ( $T_0$ :  
39 67 5.3,  $T_1$ : 5.5,  $p < 0.001$ ). Significant changes were also observed for determinants of behavior ( $T_0$ :  
40 68 5.3,  $T_1$ : 5.6,  $p < 0.001$ ).

41  
42  
43  
44  
45  
46 69 **Conclusion:** We found small, but significant changes in staff perceptions after implementation of  
47 70 an evidence-based intervention bundle. Efforts now need to be targeted at sustaining and  
48 71 reinforcing these changes, so that restrictive use of IUCs becomes an integral part of the hospital  
49 72 culture.

50  
51  
52  
53 73

1  
2  
3  
4 74 **ARTICLE SUMMARY**

5  
6 75 **Strengths and limitations of this study**

- 7  
8  
9 76 • The repeated survey design allowed us to assess changes in staff perspectives after  
10 77 implementation of a quality improvement intervention. Sustainability of the effects over time,  
11 78 however, could not be evaluated.
- 12  
13  
14 79 • By using self-generated identification codes to match respondents in the two surveys, it was  
15 80 possible to evaluate if results obtained on the group level (two cross-sections) represent results  
16 81 on the individual participant level (longitudinal).
- 17  
18 82 • No control group was included in the study design. It is possible that other trends or measures  
19 83 within the hospitals may have affected the outcomes.
- 20  
21  
22  
23  
24 84

## 85 INTRODUCTION

86 Although indwelling urinary catheters (IUCs) are commonly used in acute care hospitals, an  
87 appropriate medical indication is often missing [1,2]. IUCs are associated with urinary tract  
88 infections (UTI) and non-infectious complications such as hematuria and urethral injury. The  
89 reduction of IUC use is therefore a key measure to increase patient safety [3–7].

90 Several quality improvement (QI) studies have shown that avoiding inappropriate IUC use prevents  
91 urinary catheter harm [8–11]. Common to these studies is the implementation of a multimodal  
92 intervention bundle focusing on the reduction of unnecessary catheter use, proper insertion  
93 techniques and safe catheter maintenance. Successful bundles consist of catheter restriction  
94 protocols providing appropriate indications for catheter use and suggesting alternative urine  
95 collection methods, evaluation strategies such as reminders and/or stop orders to assess ongoing  
96 catheter need and prompt removal of unnecessary catheters, as well as educational interventions  
97 to increase awareness among healthcare workers and ensure safe catheter handling [12].

98 In addition to best practices, changes in behavior and culture – the so-called socio-adaptive  
99 component – are considered a core element of quality improvement efforts [13,14]. The  
100 organizational culture, which may be described as “the way we do things around here” [15] is  
101 known to have a favorable influence on patient safety, although the evidence for a direct causative  
102 effect on patient outcome is weak [16,17]. Several studies suggest that changes in staff knowledge  
103 and attitudes are needed to improve practice in regard to appropriate catheter utilization and  
104 prevention of catheter-associated infections [18–23]. However, to our knowledge only few studies  
105 [24–26] have reported the effects of a multi-modal intervention bundle on staff knowledge and  
106 socio-adaptive components, such as perceptions and beliefs, but none of them addressed all these  
107 factors together.

108 To promote safe urinary catheter use in Swiss hospitals, a national QI project was developed and  
109 conducted by the Swiss Patient Safety Foundation in partnership with Swissnoso, the National  
110 Center for Infection Control. The QI project was modeled after other successful QI initiatives in the  
111 US [8,9]. The overall project goal was to reduce IUC use and to promote safe catheter insertion  
112 and maintenance by implementing an evidence-based intervention bundle in seven Swiss acute  
113 care hospitals.

114 With the present study, we aimed to assess the changes in staff perspectives in the participating  
115 hospitals using survey data collected before and after implementation of the intervention bundle.  
116 We hypothesized that the intervention bundle may affect staff members differently depending on  
117 their tasks, responsibilities and familiarity with catheterization. We therefore stratified results

1  
2  
3  
4 118 according to professional group, managerial function (a proxy for hierarchical status and clinical  
5  
6 119 proximity) and frequency of catheter use in order to explore changes within these groups over time.  
7  
8 120 In before/after study designs, data from two (or more) cross-sectional survey waves are commonly  
9  
10 121 analyzed on group level to evaluate short term effects of an intervention [27–29]. However, given  
11  
12 122 the high staff turnover in hospitals and self-selection of participants, it is possible that survey  
13  
14 123 participants are not identical at the different measurement points. Thus, documented changes in  
15  
16 124 staff perspectives between two time points may merely be due to a different composition of  
17  
18 125 participant groups. We therefore used the self-generated identification code technique [30] to  
19  
20 126 anonymously match respondents in the two surveys. This allowed us to compare the effects  
21  
22 127 observed in the overall sample to the effects observed in a sub-sample of matched participants, for  
23  
24 128 whom we can assume that they had been working at the hospitals for the entire duration of the  
25  
26 129 project.

## 130 **METHODS**

### 131 **Setting**

132 The QI project consisted of two parts, a campaign to raise awareness among health care workers  
133 and an intervention that was implemented in seven pilot hospitals. For the campaign,  
134 recommendations on safe IUC use in acute care hospitals [31] were developed and disseminated  
135 to all acute care hospitals (including pilot hospitals) in Switzerland after collection of baseline data  
136 in the pilot hospitals (November 2016). The intervention focused on the implementation of an  
137 evidence-based intervention bundle in seven pilot hospitals over the course of nine months (Feb-  
138 Oct 2017). The participating hospitals contractually committed to implement the three main  
139 components of the bundle: an evidence-based indication list for urinary catheterization (appendix  
140 1), a process to evaluate and document the continued need for catheterization on a daily basis,  
141 and staff education on proper catheter insertion and maintenance. For the latter, hospitals were  
142 required to provide theoretical trainings on safe urinary catheter utilization and catheter-associated  
143 complications to all nursing and medical staff members working on the pilot units. They were also  
144 encouraged to offer practical training sessions for catheter insertion. Local project teams received  
145 templates for training materials from the program team, but they were free to design and organize  
146 the trainings according to their local structure and processes. In theoretical trainings, information  
147 on risk factors for, and prevention of catheter-associated complications, correct indications for  
148 urinary catheters and proper catheter insertion techniques was conveyed either by means of  
149 presentations at staff events and/or through completion of an e-learning tool. In most hospitals,  
150 theoretical trainings were mandatory for nursing and medical staff. In two hospitals, theoretical  
151 inputs were immediately followed by practical training sessions for catheter insertion; in four

1  
2  
3  
4 152 hospitals, practical trainings were offered on separate occasions and attendance was voluntary.  
5  
6 153 One hospital did not offer practical training sessions. No exact data could be elicited in regard to  
7  
8 154 the percentage of staff members from the pilot units that actually completed theoretical and/or  
9  
10 155 practical trainings. Strategies to implement the intervention bundle in pilot hospitals included  
11  
12 156 designated champions, internal newsletters, posters and screen savers with key project messages.

13 157 The hospitals (1 small local hospital, 4 mid-sized regional hospitals and 2 university hospitals) were  
14  
15 158 recruited to represent different organizational types and geographic regions. Each hospital could  
16  
17 159 decide which wards participated in the project; however, the participation of the emergency  
18  
19 160 department was mandatory. Participating wards included internal medicine, general surgery and  
20  
21 161 neurosurgery and gynecology/obstetrics. At each site, interdisciplinary project teams, generally  
22  
23 162 consisting of physicians, nurses and representatives from quality management and the infection  
24  
25 163 prevention unit were responsible for implementing the intervention bundle in the participating  
26  
27 164 organizational units. To encourage knowledge exchange between the local project teams, two full-  
28  
29 165 day workshops were organized at the beginning and the end of the intervention phase. The  
30  
31 166 intervention was accompanied by a before/after surveillance and a before/after staff survey. The  
32  
33 167 results of the before/after surveillance, which measured urinary catheter utilization ratio and  
34  
35 168 catheter-associated complications, will be reported elsewhere. Our publication will focus on the  
36  
37 169 results from the staff surveys and their changes over time.

### 34 170 **Study design**

36  
37 171 To collect data on staff perspectives regarding IUC use, we conducted a written survey during two  
38  
39 172 time periods. The baseline survey ( $T_0$ ) took place in October 2016, four months before the  
40  
41 173 participating hospitals started to implement the intervention bundle. The follow-up survey ( $T_1$ ) took  
42  
43 174 place one year later in October 2017. At that point, all hospitals had implemented the intervention  
44  
45 175 bundle and had been working with the new processes for six to eight months. The target  
46  
47 176 population consisted of surgical positioning specialists, nurses (healthcare assistants, registered  
48  
49 177 nurses and nursing managers) and physicians (residents, senior and chief physicians) working on  
50  
51 178 the participating units in one of the seven pilot hospitals at the time of the survey. Staff members  
52  
53 179 not involved in direct patient care, healthcare workers in education and affiliated physicians were  
54  
55 180 excluded.

### 53 181 **Questionnaire**

55  
56 182 The 55-item standardized questionnaire was developed specifically for this study by the authors  
57  
58 183 based on prior survey research conducted during a similar improvement project [32,33], and a  
59  
60 184 review of existing surveys reported in the literature [18–22] (appendix 2). The German version of

1  
2  
3  
4 185 the questionnaire was pretested among 42 physicians and nurses from three hospitals not  
5  
6 186 participating in the project. Based on their feedback, minor modifications were made to increase  
7  
8 187 validity. The final version was translated into French and Italian by professional translators.  
9  
10 188 Translations were reviewed by four native speakers per language.

11 189 The questionnaire consisted of four thematic sections. The first section entailed a 15-item  
12  
13 190 knowledge test on prevalence, risk factors and prevention of catheter-associated complications, as  
14  
15 191 well as appropriate reasons for catheter placement. The second section included 13 items  
16  
17 192 assessing respondents' perception regarding good practices and cultural factors for safe IUC use  
18  
19 193 within the organization. Items were rated on a 7-point Likert scale from "strongly disagree" (1) to  
20  
21 194 "strongly agree" (7). Two items were negatively worded and were reverse coded for data analysis.  
22  
23 195 The content of the first two sections of the questionnaire was in line with the above-mentioned  
24  
25 196 recommendations for safe catheter use [31]. The third section examined self-perceived  
26  
27 197 responsibilities in regard to catheter prescription, placement and care by means of one multiple-  
28  
29 198 response question. The fourth section assessed determinants of personal behavior in regard to the  
30  
31 199 reduction of urinary catheters. Items for this section were developed based on the theory of  
32  
33 200 planned behavior [34]. This theory states that an individual's intention to perform a behavior is  
34  
35 201 largely determined by three factors, namely a favorable or unfavorable evaluation of the behavior  
36  
37 202 (attitudes), the perceived social expectations to perform or not perform the behavior (subjective  
38  
39 203 norms) and the perceived capability to perform the behavior (perceived behavioral control) [34,35].  
40  
41 204 In our questionnaire, the three constructs (attitudes, subjective norms and perceived behavioral  
42  
43 205 control) were measured with five items each. All 15 items were rated on a 7-point Likert scale from  
44  
45 206 "strongly disagree" (1) to "strongly agree" (7). Two items were negatively worded and were reverse  
46  
47 207 coded for analysis.

48  
49 208 The questionnaire also included a section on demographics and experience with placing urinary  
50  
51 209 catheters. On the first page of the questionnaire, participants were asked to generate an 8-digit  
52  
53 210 code consisting of three elements. To do this, respondents were asked to link the following three  
54  
55 211 elements into a string of letters and numbers: the mother's initials (maiden name), father's initials  
56  
57 212 and mother's birth year (for an example see appendix 2). These three elements were selected  
58  
59 213 because they do not change over time and refer to personal information usually known by the  
60  
61 214 respondent [30]. With this technique, it is possible to clearly identify data from the same subject  
62  
63 215 and, at the same time, ensure anonymity. We used the same questionnaire at both time points. For  
64  
65 216 the follow-up survey, we included four additional questions that specifically referred to the  
66  
67 217 intervention bundle. All other items remained unaltered.

## 218 **Data collection**

1  
2  
3  
4 219 Each local project team was required to identify all eligible staff members from the target  
5  
6 220 population, inform and invite them to participate in the survey and distribute and collect the print  
7  
8 221 version of the questionnaire. In some sites, questionnaires were handed out during shift reports or  
9  
10 222 other staff events; in others they were distributed to internal mail boxes. In one hospital,  
11  
12 223 questionnaires were sent to private home addresses. Participation in the survey was voluntary and  
13  
14 224 anonymous. The returning of the questionnaire was considered informed consent.

## 15 225 **Ethics**

16  
17 226 Approval for the study was obtained from the Lead Ethics Committee of the Canton of Bern,  
18  
19 227 Switzerland (no. 2016-00682).

## 20 21 228 **Data analysis**

22  
23 229 Descriptive statistics were calculated for each item. Missing values were excluded from analysis  
24  
25 230 (pairwise exclusion). A large proportion of subjects participating in the baseline survey did not  
26  
27 231 participate in the follow-up survey. Thus, responses to both surveys cannot be assumed to stem  
28  
29 232 from the same sample. Therefore, tests for unpaired samples were used for the main analyses  
30  
31 233 comparing results between time points (see below for analyses of matched individuals). Chi-  
32  
33 234 squared tests were used to determine differences in sample composition. A “knowledge score” was  
34  
35 235 generated consisting of the number of correctly answered questions out of 15. Cronbach’s alpha  
36  
37 236 was calculated to determine internal consistency of the 13-item perception scale and the 15-item  
38  
39 237 behavior scale. For both scales a mean scale score and 95% confidence interval was computed.  
40  
41 238 Knowledge score and mean scale scores were computed for the overall sample and stratified by  
42  
43 239 professional group (nurses/physicians), managerial function (with/without) and frequency of  
44  
45 240 catheter placement (frequent/infrequent user). Frequent users were defined as healthcare workers  
46  
47 241 placing a catheter a few times a month or more often; infrequent users as placing a catheter a few  
48  
49 242 times a year or less often. Frequency was determined based on the self-reported frequency of  
50  
51 243 placing a catheter in the current work position. Changes between time points were determined for  
52  
53 244 the overall sample and each subgroup by means of *t*-tests for independent samples.

54  
55 245 To analyze the sub-sample of matched participants, self-generated IDs were matched based on  
56  
57 246 the 8-digit code and hospital affiliation. For these sub-analyses, cases with identical codes or  
58  
59 247 missing data were dropped. For matched participants, knowledge score and mean scale scores  
60  
248 were computed. To determine changes between time points in this sub-sample of matched  
249 participants, we used paired analysis. Changes between time points were determined by means of  
250 *t*-test for paired samples. Mixed analysis of variance was conducted to determine if participation in  
251 theoretical and practical training had an effect on knowledge scores over time. In addition, we



1  
2  
3  
4 252 performed difference-in-difference analyses to compare results for group-level data (cross-  
5 253 sectional data of two unmatched groups) and individual-level data (longitudinal data of matched  
6 254 participants). For each of the main outcomes, we compare average change over time among  
7 255 matched participants to the average change over time among unmatched participants.

10  
11 256 All tests were two-sided and a p-value  $<0.05$  was considered statistically significant. Cohen's *d*  
12 257 was calculated as a measure of effect size. For paired samples, the formula  $t_c$  as described in  
13 258 Dunlap et al [36] was used to calculate *d*. As an orientation for interpreting the importance of the  
14 259 effect, we used the following classification: 0.2=small effect, 0.5=medium effect and 0.8=large  
15 260 effect [37]. All analyses were performed with Stata version 14.1 (StataCorp, College Station,  
16 261 Texas).

## 22 262 **Patient and public involvement**

23  
24 263 Patients or the public were not involved in the design or planning of this study.

## 26 264 **RESULTS**

### 29 265 **Response rate and study sample**

30  
31 266 1,579 out of 3,245 invited staff members participated in the baseline survey (48.7% response rate)  
32 267 and 1,527 out of 3,235 invited staff members participated in the follow-up survey (47.2% response  
33 268 rate). The proportion of questionnaires received from each hospital in the total sample was similar  
34 269 in both waves ( $p=0.39$ ). The characteristics of the study samples at  $T_0$  and  $T_1$  are provided in table  
35 270 1. Sample composition differed slightly in regard to age ( $p=0.03$ ), profession ( $p=0.04$ ) and work unit  
36 271 between the two time points ( $p=0.02$ ).

37  
38 272 Almost all of the 3,106 participants in both survey periods generated an 8-digit ID. At baseline, 35  
39 273 respondents (2.2%) had missing values on each of the three code elements and the sample  
40 274 contained 3 sets of identical IDs. At follow-up, 51 respondents (3.3%) did not provide an 8-digit ID  
41 275 and 2 sets of identical IDs were found. For 420 respondents, we were able to successfully match  
42 276 the 8-digit identification code and hospital affiliation. This represents 27.5% of the 1,527 potential  
43 277 matches. 1,118 IDs were only present at  $T_0$  and 1,052 IDs were only present at  $T_1$ .

44  
45  
46  
47  
48  
49  
50  
51  
52 278

**Table 1. Study sample characteristics**

|                                                                     | T <sub>0</sub><br>n = 1,579 | T <sub>1</sub><br>n = 1,527 | p-value <sup>+</sup> |
|---------------------------------------------------------------------|-----------------------------|-----------------------------|----------------------|
| Participants per hospital, n (%) *                                  |                             |                             | 0.385                |
| Hospital A (approx. 900 beds)                                       | 221 (14.0)                  | 223 (14.6)                  |                      |
| Hospital B (approx. 800 beds)                                       | 154 (9.8)                   | 170 (11.1)                  |                      |
| Hospital C (approx. 500 beds)                                       | 138 (8.7)                   | 127 (8.3)                   |                      |
| Hospital D (approx. 500 beds)                                       | 362 (22.9)                  | 325 (21.3)                  |                      |
| Hospital E (approx. 400 beds)                                       | 347 (22.0)                  | 342 (22.4)                  |                      |
| Hospital F (approx. 300 beds)                                       | 284 (18.0)                  | 250 (16.4)                  |                      |
| Hospital G (approx. 100 beds)                                       | 73 (4.6)                    | 90 (5.9)                    |                      |
| Females, n (%)                                                      | 1,187 (77.6)                | 1,191 (79.7)                | 0.173                |
| Age in years (mean, SD)                                             | 36.8 (10.5)                 | 35.9 (10.5)                 | 0.0255               |
| Profession, n (%)                                                   |                             |                             | 0.043                |
| Nurse                                                               | 1,050 (69.1)                | 1,084 (72.8)                |                      |
| Physician                                                           | 350 (23.0)                  | 288 (19.3)                  |                      |
| Other                                                               | 120 (7.9)                   | 117 (7.9)                   |                      |
| With managerial function, n (%)                                     | 232 (16.4)                  | 193 (13.9)                  | 0.066                |
| Years working in this hospital, n (%)                               |                             |                             | 0.849                |
| < 2 years                                                           | 376 (24.5)                  | 380 (25.4)                  |                      |
| 2 to < 5 years                                                      | 385 (25.0)                  | 357 (23.9)                  |                      |
| 5 to < 10 years                                                     | 264 (17.2)                  | 271 (18.1)                  |                      |
| 10 to < 20 years                                                    | 307 (20.0)                  | 297 (19.9)                  |                      |
| ≥ 20 years                                                          | 206 (13.4)                  | 190 (12.7)                  |                      |
| Work unit in the past three months, n (%)                           |                             |                             | 0.020                |
| Ward                                                                | 906 (58.5)                  | 963 (63.9)                  |                      |
| Emergency department                                                | 248 (16.0)                  | 190 (12.6)                  |                      |
| Intensive care unit                                                 | 144 (9.3)                   | 129 (8.6)                   |                      |
| Operating room                                                      | 146 (9.4)                   | 141 (9.4)                   |                      |
| Other                                                               | 104 (6.7)                   | 85 (5.6)                    |                      |
| Overall experience with catheter placement throughout career, n (%) |                             |                             | 0.300                |
| Never                                                               | 26 (1.7)                    | 30 (2.0)                    |                      |
| 1-5 times                                                           | 169 (11.0)                  | 171 (11.4)                  |                      |
| 6-20 times                                                          | 341 (22.2)                  | 370 (24.6)                  |                      |
| > 20 times                                                          | 1,002 (65.2)                | 931 (62.0)                  |                      |
| Frequency of catheter placement in current position, n (%)          |                             |                             | 0.084                |
| Frequent user                                                       | 690 (44.2)                  | 618 (41.1)                  |                      |
| Infrequent user                                                     | 871 (55.8)                  | 885 (58.9)                  |                      |

Note: Due to rounding percentages may not always add up to 100%.

\* In the larger hospitals, not all of the departments participated in the project

+ p-values for changes between the two time periods

T<sub>0</sub>=baseline survey, T<sub>1</sub>=follow-up survey

Frequent user=places a catheter a few times a month or more often

Infrequent user=places a catheter a few times a year or less often

## 280 Knowledge

281 For the overall study sample, the mean number of correctly answered knowledge items increased  
 282 significantly between  $T_0$  and  $T_1$  ( $p < 0.001$ ) (table 2). Subgroup analysis indicates that knowledge  
 283 scores increased in particular for nurses, staff members without managerial function and staff  
 284 members frequently placing catheters. Effect sizes for the changes between the time points were  
 285 small to moderate. Percentages of correct answers for each of the 15 items are provided in  
 286 appendix 3.

**Table 2. Mean number of correct answers provided for 15 knowledge items**

|                                 | Mean $T_0$ (95% CI) | $n_{T_0}$ | Mean $T_1$ (95% CI) | $n_{T_1}$ | p-value | Effect size |
|---------------------------------|---------------------|-----------|---------------------|-----------|---------|-------------|
| Overall sample                  | 10.4 (10.3;10.5)    | 1,579     | 11.0 (10.9;11.1)    | 1,527     | <0.001  | 0.29        |
| Professional group              |                     |           |                     |           |         |             |
| Nurses                          | 10.2 (10.1;10.4)    | 1,050     | 10.9 (10.8;11.0)    | 1,084     | <0.001  | 0.35        |
| Physicians                      | 11.1 (11.0;11.3)    | 350       | 11.4 (11.2;11.6)    | 288       | 0.047   | 0.16        |
| Managerial function             |                     |           |                     |           |         |             |
| With                            | 11.3 (11.1;11.5)    | 232       | 11.6 (11.4;11.9)    | 193       | 0.058   | 0.19        |
| Without                         | 10.3 (10.1;10.4)    | 1,187     | 10.9 (10.8;11.0)    | 1,199     | <0.001  | 0.33        |
| Frequency of catheter placement |                     |           |                     |           |         |             |
| Frequent user                   | 10.0 (9.8;10.1)     | 690       | 10.7 (10.6;10.9)    | 618       | <0.001  | 0.40        |
| Infrequent user                 | 10.8 (10.7;10.9)    | 871       | 11.2 (11.1;11.3)    | 885       | <0.001  | 0.22        |
| Matched ID                      | 10.4 (10.3;10.6)    | 420       | 11.3 (11.1;11.5)    | 420       | <0.001  | 0.49        |
| Unmatched ID                    | 10.5 (10.3;10.6)    | 1,118     | 11.0 (10.9;11.1)    | 1,052     | <0.001  | 0.31        |

$T_0$ =baseline survey,  $T_1$ =follow-up survey

Frequent user=places a catheter a few times a month or more often

Infrequent user=places a catheter a few times a year or less often

287

288 We used the sub-sample of matched participants to examine the effect of training on the change in  
 289 knowledge score over time. Among all matched respondents, 102 (25.3%) indicated having  
 290 participated in *both* theoretical and practical training; 130 (32.2%) respondents had participated in  
 291 *either* theoretical or practical training and 172 (42.6%) respondents did not participated in *any*  
 292 training (missing values  $n=16$ ). Results from the mixed analysis of variance showed that there was  
 293 no significant interaction effect between time and training ( $F_{2,401} = 1.05$ ,  $p=0.35$ ). In other words,  
 294 knowledge scores between participants with practical and/or theoretical training did not change  
 295 differently over time as compared to participants without training.

## 296 Perception of practices and culture

297 The mean scale score for perception of current practices and culture increased significantly within  
 298 the overall sample and within all subgroups between the two time points ( $p < 0.001$ ) (table 3).

299 Generally, agreement to the statements was moderate at baseline and strengthened over time.  
 300 Yet, agreement remained moderately strong, with no group reaching a mean scale score above 6  
 301 even after implementation of the intervention bundle. Mean scores for each item are provided in  
 302 appendix 4.

**Table 3. Perception: mean scale score**

|                                 | Mean $T_0$ (95%<br>CI) | $n_{T_0}$ | Mean $T_1$ (95%<br>CI) | $n_{T_1}$ | p-<br>value | Effect<br>size |
|---------------------------------|------------------------|-----------|------------------------|-----------|-------------|----------------|
| Overall sample                  | 5.3 (5.3; 5.3)         | 1,568     | 5.5 (5.5; 5.6)         | 1,521     | <0.001      | 0.31           |
| Professional group              |                        |           |                        |           |             |                |
| Nurses                          | 5.4 (5.3; 5.4)         | 1,044     | 5.6 (5.6; 5.7)         | 1,082     | <0.001      | 0.33           |
| Physicians                      | 5.1 (5.0; 5.1)         | 347       | 5.3 (5.2; 5.4)         | 286       | <0.001      | 0.29           |
| Managerial function             |                        |           |                        |           |             |                |
| With                            | 5.2 (5.1; 5.3)         | 230       | 5.6 (5.5; 5.7)         | 191       | <0.001      | 0.52           |
| Without                         | 5.3 (5.3; 5.4)         | 1,180     | 5.6 (5.5, 5.6)         | 1,197     | <0.001      | 0.29           |
| Frequency of catheter placement |                        |           |                        |           |             |                |
| Frequent user                   | 5.2 (5.1; 5.3)         | 690       | 5.4 (5.3, 5.5)         | 618       | <0.001      | 0.22           |
| Infrequent user                 | 5.4 (5.3; 5.4)         | 861       | 5.7 (5.6, 5.7)         | 880       | <0.001      | 0.37           |
| Matched ID                      | 5.4 (5.3; 5.4)         | 416       | 5.6 (5.5; 5.7)         | 416       | <0.001      | 0.32           |
| Unmatched ID                    | 5.3 (5.2; 5.3)         | 1,108     | 5.5 (5.5; 5.6)         | 1,049     | <0.001      | 0.31           |

Note: Scale consisted of 13 items.

Items were answered on a scale from 1 (strongly disagree) to 7 (strongly agree).

Cronbach's alpha for the scale:  $T_0$   $\alpha=0.79$  and  $T_1$   $\alpha=0.80$

$T_0$ =baseline survey,  $T_1$ =follow-up survey

Frequent user=places a catheter a few times a month or more often

Infrequent user=places a catheter a few times a year or less often

303  
 304 **Responsibilities**  
 305 Self-reported responsibilities concerning IUC management by nurses and physicians changed only  
 306 slightly over time (figure 1). At baseline and at follow-up, nurses mainly felt responsible for placing,  
 307 maintaining and removing an IUC. However, at  $T_1$ , fewer nurses felt responsible for prescribing  
 308 catheter placement ( $p<0.001$ ) as compared to  $T_0$  and a higher percentage felt responsible for  
 309 assessing the need for continued catheterization ( $p=0.002$ ). Physicians perceived themselves to  
 310 be mainly responsible for ordering catheter placement and removal at both time points. At  $T_1$ ,  
 311 fewer of them felt responsible for placing or assisting with placing an IUC as compared to  $T_0$ , but  
 312 differences were not statistically significant.

### 313 **Determinants of behavior**

314 The mean score for the scale assessing the determinants of behavior increased significantly  
 315 between baseline and follow-up ( $p<0.001$ ). Positive changes in mean scores were observed for all

three constructs (attitudes, subjective norms and perceived behavioral control). They were particularly strong for items assessing perceived social expectations to use catheters restrictively (see appendix 5). The positive trends could also be observed for professional group, managerial function and frequency of catheter placement (table 4). Medium effect sizes indicate practical relevance of these changes.

**Table 4. Determinants of behavior: mean scale score**

|                                 | Mean $T_0$ (95% CI) | $n_{T0}$ | Mean $T_1$ (95% CI) | $n_{T1}$ | p-value | Effect size |
|---------------------------------|---------------------|----------|---------------------|----------|---------|-------------|
| Overall sample                  | 5.3 (5.3; 5.3)      | 1,539    | 5.6 (5.6; 5.6)      | 1,502    | <0.001  | 0.43        |
| Professional group              |                     |          |                     |          |         |             |
| Nurses                          | 5.3 (5.2; 5.3)      | 1,046    | 5.6 (5.6; 5.7)      | 1,083    | <0.001  | 0.56        |
| Physicians                      | 5.4 (5.3; 5.5)      | 349      | 5.6 (5.5; 5.6)      | 287      | 0.005   | 0.23        |
| Managerial function             |                     |          |                     |          |         |             |
| With                            | 5.6 (5.5; 5.7)      | 230      | 5.8 (5.7; 5.9)      | 192      | <0.001  | 0.38        |
| Without                         | 5.2 (5.2; 5.3)      | 1,184    | 5.6 (5.5; 5.6)      | 1,198    | <0.001  | 0.50        |
| Frequency of catheter placement |                     |          |                     |          |         |             |
| Frequent user                   | 5.2 (5.2; 5.3)      | 675      | 5.6 (5.5; 5.6)      | 615      | <0.001  | 0.46        |
| Infrequent user                 | 5.3 (5.3; 5.4)      | 847      | 5.6 (5.6; 5.7)      | 884      | <0.001  | 0.41        |
| Matched ID                      | 5.3 (5.3; 5.4)      | 405      | 5.7 (5.6; 5.8)      | 405      | <0.001  | 0.58        |
| Unmatched ID                    | 5.3 (5.3; 5.3)      | 1,090    | 5.6 (5.5; 5.6)      | 1,038    | <0.001  | 0.37        |

Note: Scale consisted of 15 items.

Items were answered on a scale from 1 (strongly disagree) to 7 (strongly agree).

Cronbach's alpha for scale:  $T_0$   $\alpha=0.72$  and  $T_1$   $\alpha=0.74$

$T_0$ =baseline survey,  $T_1$ =follow-up survey

Frequent user=places a catheter a few times a month or more often

Infrequent user=places a catheter a few times a year or less often

321

### 322 Difference-in-difference analyses of group and individual level data

323 Knowledge scores increased slightly more among participants with a matched ID compared to  
 324 unmatched participants ( $p=0.047$ ). Mean scale scores for perception of current practices and culture  
 325 increased for both matched and unmatched participants to a similar extent ( $p=0.894$ ). Mean scale  
 326 scores for determinants of behavior increased slightly more for participants with a matched ID  
 327 compared to unmatched participants ( $p=0.033$ ).

### 328 DISCUSSION

329 We observed positive changes in staff knowledge, perceptions and attitudes regarding IUC use  
 330 following the implementation of a multimodal intervention bundle in seven hospitals. Observed  
 331 effects were small to moderate, requiring a closer look at the challenges of implementing and  
 332 evaluating a multi-faceted intervention bundle in a large scale, national program. We found that in

1  
2  
3  
4 333 two of the thematic sections – knowledge and determinants of behavior - the scores for matched  
5  
6 334 participants increased slightly more than for unmatched participants. This seems plausible as the  
7  
8 335 unmatched group includes participants of various levels of program exposition. It suggests that  
9  
10 336 data analyzed on group level (two unmatched cross-sections) to evaluate short term effects of an  
11  
12 337 intervention can to some extent, but not fully represent longitudinal effects on the individual  
13  
14 338 participant level.

15 339 Knowledge scores increased significantly between baseline and follow-up, indicating that staff  
16  
17 340 members in our pilot hospitals had more factual knowledge about the use and potential harm of  
18  
19 341 urinary catheters after the intervention. Interestingly, however, we could not verify that participation  
20  
21 342 in education and training sessions contributed to knowledge increases. When analyzing the results  
22  
23 343 in our sub-sample of matched participants (i.e. individuals for whom we know that they worked in  
24  
25 344 the hospital throughout the entire program), we found that changes in knowledge scores did not  
26  
27 345 differ between staff members with and without training. The findings indicate that other factors,  
28  
29 346 such as the dissemination of the indication list or the presence of champions may have contributed  
30  
31 347 to the observed effects in knowledge. Regarding respondents' perception of current practices and  
32  
33 348 cultural factors within their organization, we also found a small, but significant effect at the end of  
34  
35 349 the intervention. The moderate effect size suggests that staff members indeed perceived positive  
36  
37 350 changes in IUC management and safety climate within their organization. Factors determining  
38  
39 351 intentions to perform a certain behavior, namely personal attitudes, perceived behavioral control  
40  
41 352 and subjective norms changed over the course of the project too. At follow-up, staff members  
42  
43 353 generally expressed higher willingness to contribute to a safe and restrictive use of IUCs. In  
44  
45 354 particular, participants felt higher expectations from their social environment to reduce catheters,  
46  
47 355 suggesting that a change in culture could indeed be initiated.

48  
49 356 Even though there was a clear positive trend, the differences between survey periods on all three  
50  
51 357 sections of the questionnaire (knowledge, perception of practices and culture, and determinants of  
52  
53 358 behavior) were only small to moderate. Recommended practices and socio-adaptive components  
54  
55 359 were thus, from the perspective of participants, not fully established even after the intervention.  
56  
57 360 These results are not surprising, because change in organizational culture is a slow process,  
58  
59 361 requiring endurance and continuous effort that could not be provided within the short time frame of  
60  
61 362 the QI program. Studies that have collected long-term data on surgical checklist implementation  
62  
63 363 state suggest that it takes time for cultural change to develop and for positive effects to fully  
64  
65 364 become evident [38,39]. For example, an Australian study that has examined compliance with  
66  
67 365 surgical safety checklist use reports that reduction in mortality rates reached significance only in  
68  
69 366 the 2-3 year period after implementation [38]. In addition, we did not strictly define implementation  
70  
71 367 strategies in order to allow pilot hospitals to adapt the intervention bundle to their local context.

1  
2  
3  
4 368 Therefore, implementation fidelity could not systematically be assessed. Informal feedback from  
5  
6 369 local project coordinators suggests that it was not always possible to deliver the intervention  
7  
8 370 bundle as intended. For example, even though training sessions were mandatory, not all staff from  
9  
10 371 the target population could eventually be reached.

11 372 Another explanation could be high staff turnover rates. Almost all of the respondents generated an  
12  
13 373 8-digit code. Interestingly, however, only 28% of the IDs provided could be matched between the  
14  
15 374 two surveys. Participants at follow-up were thus, for the most part, not the same individuals as at  
16  
17 375 baseline. This could be a sign for high staff turnover rates during the intervention period. However,  
18  
19 376 it is also possible that unmatched participants had been working at the hospital throughout the  
20  
21 377 intervention, but had been unwilling or unable to participate in the same survey twice.  
22  
23 378 Nevertheless, this finding points to the importance of ensuring that hospitals continuously offer  
24  
25 379 training, education and policy reinforcement. Continued efforts to incorporate recommended  
26  
27 380 practices into routine care even after completion of the actual project phase are needed to move  
28  
29 381 the intervention from a time-limited “project” to a continuous commitment and ensure that  
30  
31 382 motivation to reduce urinary catheters is kept at a high level [40,41].

32  
33 383 In our QI program, a before/after surveillance for catheterization and catheter-associated  
34  
35 384 complications was conducted in the same time periods as the staff survey. Results show a  
36  
37 385 significant decrease in catheter utilization rates in all pilot hospitals (unpublished data, manuscript  
38  
39 386 in preparation). Secondary data analysis would be needed to examine the relationship between  
40  
41 387 catheter utilization rates and staff perspectives. Some hypotheses can be put forward to explain  
42  
43 388 the observation that while changes in staff perspectives were rather small, we did see a decrease  
44  
45 389 in catheter utilization. It is possible that even small changes in staff knowledge and perception can  
46  
47 390 have a substantial practical relevance. However, it is also possible that the items in our  
48  
49 391 questionnaire do not adequately measure knowledge and perceptions required to reduce IUC use  
50  
51 392 (content validity). To our knowledge, no other study has assessed the effects of an intervention  
52  
53 393 bundle on staff behavior with similar measures; therefore it is not possible to relate our findings to  
54  
55 394 existing research. Wakefield and colleagues found that perceptions about the behavior of  
56  
57 395 professional peers, and the personal belief that engaging in a certain behavior will lead to better  
58  
59 396 safety outcomes, are the strongest factors influencing safety behavior [15]. The authors conclude  
60  
397 that interventions too often rely on educational measures in order to change behavior and argue  
398 that using behavioral models to design interventions may be more effective. Our results provide  
399 additional support for this argument. We saw the strongest effects in perceived norms to reduce  
400 catheter use, suggesting that efforts aimed at changing organizational culture may be particularly  
401 effective. We would however argue that staff education and training can offer an important platform

1  
2  
3  
4 402 to disseminate and reinforce new norms and expectations, especially if they are used by clinical  
5  
6 403 leaders to demonstrate their commitment to the cause and to foster interprofessional collaboration.  
7

8 404 Promoting collaboration among nurses and physicians is especially important because urinary  
9  
10 405 catheter management is a strongly interprofessional topic and roles and responsibilities need to be  
11  
12 406 clear for all of the involved health care workers. In a previous study with data from the baseline  
13  
14 407 survey, we analyzed how nurses and physicians perceived their respective responsibilities for IUC  
15  
16 408 management [42]. We found that physicians mainly felt responsible for prescribing catheter  
17  
18 409 placement and removal, while nurses generally considered themselves responsible for placing,  
19  
20 410 managing and removing them. However, both nurses and physicians felt equally responsible for  
21  
22 411 assessing the need for continued catheterization. The results from the present study show that at  
23  
24 412 the end of the intervention, the perceived division of tasks between the two groups remained  
25  
26 413 largely the same. This could either indicate that because of the intervention bundle, both groups  
27  
28 414 were encouraged to assume responsibility in this area and interprofessional commitment was  
29  
30 415 strengthened. However, it could also mean that tasks especially in regard to the re-evaluation of  
31  
32 416 the need for a catheter were not clarified over the course of the project.

### 31 417 **Limitations**

32 418 This study has several limitations. We used the theory of planned behavior to model intention to  
33  
34 419 reduce urinary catheter use. However, it is not possible to know if changes observed in staff  
35  
36 420 perceptions led to a true change in practice. In a future study, staff survey data should be linked  
37  
38 421 with surveillance data on hospital-level to examine if specific changes in staff perceptions are  
39  
40 422 associated with changes in specific clinical outcomes. Direct observations of catheter placements  
41  
42 423 may be considered as another method to gain insight into compliance with protocols for safe  
43  
44 424 catheterization and changes in clinical practice [43]. This method was originally proposed to  
45  
46 425 participating hospitals in our project, but was rejected due to the additional resources required. For  
47  
48 426 practical purposes, we did not include a control group in the study design. The single-group design  
49  
50 427 does therefore not allow any causal inferences about the contribution of the intervention bundle on  
51  
52 428 the observed effects. It is possible that other secular trends or measures within the hospitals may  
53  
54 429 have affected the outcomes. A stepped wedge design could present an alternative to this design.  
55  
56 430 This design randomizes participating sites into sequential cohorts. All cohorts eventually implement  
57  
58 431 the intervention, each providing their own control data in the meantime and offering researchers  
59  
60 432 the chance to investigate implementation challenges and make adjustments along the way [44]. In  
433  
434  
435 addition, conducting focus groups or interviews with staff from each site could have provided a  
more in-depth understanding of staff perceptions after the intervention and the contextual factors  
that shape the implementation of a complex intervention in a new setting. The before/after study



1  
2  
3  
4 436 design does not allow us to evaluate sustainability of the intervention over time. A further follow-up  
5  
6 437 survey or a time-series approach could have shed more light on the long-term effects in the  
7  
8 438 hospitals. We chose to administer paper instead of electronic versions of the survey to minimize  
9  
10 439 coverage error because not all staff members in participating hospitals had access to individual e-  
11  
12 440 mail addresses. Furthermore, paper surveys have been shown to generate higher response rates  
13  
14 441 than surveys administered online [45]. With this method, we were able to attain reasonable  
15  
16 442 response rates at both survey periods. Since data collection was organized by local project teams,  
17  
18 443 however, we have no information on non-participants. It is possible that only highly motivated staff  
19  
20 444 members participated in the survey, which may result in more positive responses. The two survey  
21  
22 445 samples were comparable with respect to participants per hospital. For some of the socio-  
23  
24 446 demographic characteristics, notably profession and work unit, we found significant differences  
25  
26 447 between the two time periods. We cannot differentiate if this is due to selective non-responses or  
27  
28 448 staff fluctuation. Lastly, it is possible that only high performing units open to change have been  
29  
30 449 chosen to participate in the intervention project. This may limit generalizability of our findings to  
31  
32 450 other units and hospitals.

## 33 451 **Conclusion**

34 452 Changing staff attitudes, knowledge and behavior are important prerequisites for an effective  
35  
36 453 reduction of catheter use and catheter-associated complications. We found small, but significant  
37  
38 454 changes in staff perceptions after implementation of an evidence-based intervention bundle. The  
39  
40 455 positive trends were present in all subgroups, indicating that regardless of responsibilities and  
41  
42 456 practice of catheter placement, perspectives on urinary catheter use changed over time. Efforts  
43  
44 457 now need to be targeted at reinforcing and sustaining these changes, so that restrictive use of  
45  
46 458 IUCs becomes an integral part of the hospital culture.

47  
48 459 **Author contributions:** AN, SZ, JM, AS and DS contributed to the design of the study and the  
49  
50 460 survey instrument, SK und GJ contributed to the data collection. AN and DS analyzed the data. AN  
51  
52 461 and SZ drafted the manuscript, JM, AS, SK, GJ and DS critically revised the manuscript for  
53  
54 462 important intellectual content. All authors approved the manuscript.

55  
56 463 **Funding:** This work was supported by a grant from the Swiss Federal Office of Public Health [no.  
57  
58 464 15.011083].

59  
60 465 **Competing interests:** All authors report no conflicts of interest relevant to this article.

466  
467 **Data sharing statement:** All data relevant to the study are included in the article or uploaded as  
supplementary information.

1  
2  
3  
4 468

5  
6  
7 469 **Figure legends**

8  
9 470 **Figure 1. Self-reported responsibilities in regard to urinary catheters by profession**

10  
11 471 \* Change between time periods significant on  $p < 0.05$ .

12  
13  
14 472

15  
16 473 **Appendices**

17  
18  
19 474 Appendix 1. List of indications for indwelling urinary catheters

20  
21 475 Appendix 2. Questionnaire

22  
23  
24 476 Appendix 3. Knowledge: % correct answers provided per item at T0 and T1

25  
26 477 Appendix 4. Perception: mean and standard deviation per item at T0 and T1

27  
28 478 Appendix 5. Behavior: mean and standard deviation per item at T0 and T1

29  
30  
31  
32  
33  
34  
35  
36  
37  
38  
39  
40  
41  
42  
43  
44  
45  
46  
47  
48  
49  
50  
51  
52  
53  
54  
55  
56  
57  
58  
59  
60

479 **REFERENCES**

- 480 1. Jansen IA, Hopmans TEM, Wille JC, Van Den Broek PJ, Van Der Kooij TII, Van Benthem  
481 BHB. Appropriate use of indwelling urethra catheters in hospitalized patients: Results of a  
482 multicentre prevalence study. *BMC Urol.* 2012;12:2–7.
- 483 2. Munasinghe R, Yazdani H, Siddique M, Hafeez W. Appropriateness of use of indwelling  
484 urinary catheters in patients admitted to the medical service. *Infect Control Hosp Epidemiol.*  
485 2001;22:647–9.
- 486 3. Saint S. Clinical and economic consequences of nosocomial catheter- related bacteriuria.  
487 *Am J Infect Control.* 2000;28:68–75.
- 488 4. Nicolle LE. Catheter associated urinary tract infections. *Antimicrob Resist Infect Control.*  
489 2014;3:1–8.
- 490 5. Hollingsworth JM, Rogers MAM, Krein SL, Hickner A, Kuhn L, Cheng A, et al. Determining  
491 the noninfectious complications of indwelling urethral catheters: a systematic review and  
492 meta-analysis. *Ann Intern Med.* 2013 Sep;159:401–10.
- 493 6. Lo E, Nicolle L, Classen D, Arias KM, Podgorny K, Anderson DJ, et al. Strategies to Prevent  
494 Catheter-Associated Urinary Tract Infections in Acute Care Hospitals. *Infect Control Hosp*  
495 *Epidemiol.* 2008;29:S41–50.
- 496 7. Gould CV, Umscheid CA, Agarwal RK, Kuntz G, Pegues DA. Guideline for Prevention of  
497 Catheter-Associated Urinary Tract Infections 2009. *Infect Control Hosp Epidemiol.*  
498 2010;31:319–26.
- 499 8. Saint S, Olmsted RN, Fakhri MG, Kowalski CP, Watson SR, Sales AE, et al. Translating  
500 health care-associated urinary tract infection prevention research into practice via the  
501 bladder bundle. *Jt Comm J Qual Patient Saf.* 2009;35:449–55.
- 502 9. Fakhri MG, George C, Edson BS, Goeschel CA, Saint S. Implementing a National Program  
503 to Reduce Catheter-Associated Urinary Tract Infection: A Quality Improvement  
504 Collaboration of State Hospital Associations, Academic Medical Centers, Professional  
505 Societies, and Governmental Agencies. *Infect Control Hosp Epidemiol.* 2013;34:1048–54.
- 506 10. Janzen J, Buurman BM, Spanjaard L, de Reijke TM, Goossens A, Geerlings SE. Reduction  
507 of unnecessary use of indwelling urinary catheters. *BMJ Qual Saf.* 2013;22:984–8.
- 508 11. Saint S, Greene MT, Krein SL, Rogers MAM, Ratz D, Fowler KE, et al. A Program to

- 1  
2  
3  
4 509 Prevent Catheter-Associated Urinary Tract Infection in Acute Care. *N Engl J Med.*  
5 510 2016;374:2111–9.  
6  
7  
8 511 12. Meddings J, Rogers MAM, Krein SL, Fakhri MG, Olmsted RN, Saint S. Reducing  
9 512 unnecessary urinary catheter use and other strategies to prevent catheter-associated  
10 513 urinary tract infection: An integrative review. *BMJ Qual. Saf.* 2014;23:277–89.  
11  
12  
13 514 13. Saint S, Howell JD, Krein SL. Implementation science: how to jump-start infection  
14 515 prevention. *Infect Control Hosp Epidemiol.* 2010 Nov;31 Suppl 1:S14–7.  
15  
16  
17 516 14. Weaver SJ, Lubomksi LH, Wilson RF, Pfoh ER, Martinez KA, Dy SM. Promoting a culture of  
18 517 safety as a patient safety strategy: A systematic review. *Ann Intern Med.* 2013;158:369–74.  
19  
20  
21 518 15. Wakefield JG, McLaws M-L, Whitby M, Patton L. Patient safety culture: factors that influence  
22 519 clinician involvement in patient safety behaviours. *BMJ Qual Saf.* 2010;19:585–91.  
23  
24  
25 520 16. Meddings J, Reichert H, Todd Greene M, Safdar N, Krein SL, Olmsted RN, et al. Evaluation  
26 521 of the association between Hospital Survey on Patient Safety Culture (HSOPS) measures  
27 522 and catheter-associated infections: Results of two national collaboratives. *BMJ Qual Saf.*  
28 523 2017;26:226–35.  
29  
30  
31 524 17. Smith SN, Todd Greene M, Mody L, Banaszak-Holl J, Petersen LD, Meddings J. Evaluation  
32 525 of the association between Nursing Home Survey on Patient Safety culture (NHSOPS)  
33 526 measures and catheter-associated urinary tract infections: Results of a national  
34 527 collaborative. *BMJ Qual Saf.* 2018;27:464–73.  
35  
36  
37 528 18. Paras ML, Shenoy ES, Hsu HE, Walensky RP, Hooper DC. Housestaff knowledge related to  
38 529 urinary catheter use and catheter-associated urinary tract infections. *Infect Control Hosp*  
39 530 *Epidemiol.* 2015;36:1355–7.  
40  
41  
42 531 19. Jain M, Dogra V, Mishra B, Thakur A, Loomba P. Knowledge and attitude of doctors and  
43 532 nurses regarding indication for catheterization and prevention of catheter-associated urinary  
44 533 tract infection in a tertiary care hospital. *Indian J Crit Care Med.* 2015;19:76.  
45  
46  
47 534 20. Viswanathan K, Rosen T, Mulcare MR, Clark S, Hayes J, Lachs MS, et al. Emergency  
48 535 Department Placement and Management of Indwelling Urinary Catheters in Older Adults:  
49 536 Knowledge, Attitudes, and Practice. *J Emerg Nurs.* 2015;41:414–22.  
50  
51  
52 537 21. Drekonja DM, Kuskowski MA, Johnson JR. Foley catheter practices and knowledge among  
53 538 Minnesota physicians. *Am J Infect Control.* 2010;38:694–700.  
54  
55  
56  
57  
58  
59  
60

- 1  
2  
3  
4 539 22. Drekonja DM, Kuskowski MA, Johnson JR. Internet survey of Foley catheter practices and  
5 540 knowledge among Minnesota nurses. *Am J Infect Control*. 2010;38:31–7.  
6  
7  
8 541 23. Mizerek E, Wolf L. To Foley or Not To Foley: Emergency Nurses' Perceptions of Clinical  
9 542 Decision Making in the Use of Urinary Catheters in the Emergency Department. *J Emerg*  
10 543 *Nurs*. 2015;41:329–34.  
11  
12  
13  
14 544 24. Marigliano A, Barbadoro P, Pennacchietti L, D'Errico MM, Prospero E. Active training and  
15 545 surveillance: 2 good friends to reduce urinary catheterization rate. *Am J Infect Control*.  
16 546 2012;40:692–5.  
17  
18  
19 547 25. Gray D, Nussle R, Cruz A, Kane G, Toomey M, Bay C, et al. Effects of a catheter-  
20 548 associated urinary tract infection prevention campaign on infection rate, catheter utilization,  
21 549 and health care workers' perspective at a community safety net hospital. *Am J Infect*  
22 550 *Control*. 2016;44:115–6.  
23  
24  
25  
26 551 26. Fakh MG, Rey JE, Pena ME, Szpunar S, Saravolatz LD. Sustained reductions in urinary  
27 552 catheter use over 5 years: Bedside nurses view themselves responsible for evaluation of  
28 553 catheter necessity. *Am J Infect Control*. 2013;41:236–9.  
29  
30  
31  
32 554 27. Riad-Allen L, Dermody SS, Herman Y, Bellissimo K, Selby P, George TP. Becoming  
33 555 tobacco-free: Changes in staff and patient attitudes and incident reports in a large academic  
34 556 mental health and addictions hospital. *Am J Addict*. 2017 Mar;26:183–91.  
35  
36  
37  
38 557 28. Mitchell BG, White N, Farrington A, Allen M, Page K, Gardner A, et al. Changes in  
39 558 knowledge and attitudes of hospital environmental services staff: The Researching Effective  
40 559 Approaches to Cleaning in Hospitals (REACH) study. *Am J Infect Control*. 2018;0–5.  
41  
42  
43 560 29. Laur CV, Keller HH, Curtis L, Douglas P, Murphy J, Ray S. Comparing Hospital Staff  
44 561 Nutrition Knowledge, Attitudes, and Practices Before and 1 Year After Improving Nutrition  
45 562 Care: Results From the More-2-Eat Implementation Project. *J Parenter Enter Nutr*.  
46 563 2017;42:014860711771849.  
47  
48  
49  
50 564 30. Yurek LA, Vasey J, Havens DS. The Use of Self-Generated Identification Codes in  
51 565 Longitudinal Research. *Eval Rev*. 2010;32:435–52.  
52  
53  
54 566 31. Züllig S, Mascherek A. Sicherheit bei Blasenkathetern. Empfehlungen im Rahmen des  
55 567 nationalen Pilotprogramms progress! Sicherheit bei Blasenkathetern. Zürich: Stiftung für  
56 568 Patientensicherheit; 2016.

- 1  
2  
3  
4 569 32. Mascherek AC, Schwappach DLB, Bezzola P. Frequency of use and knowledge of the  
5 570 WHO-surgical checklist in Swiss hospitals: A cross-sectional online survey. *Patient Saf*  
6 571 *Surg.* 2013;7:1–7.  
7  
8  
9  
10 572 33. Mascherek AC, Gehring K, Bezzola P, Schwappach DLB. Using the theory of planned  
11 573 behaviour to model antecedents of surgical checklist use: A cross-sectional study. *BMC*  
12 574 *Health Serv Res.* 2015;15:462.  
13  
14  
15 575 34. Ajzen I. The theory of planned behavior. *Organ Behav Hum Decis Process.* 1991;50:179–  
16 576 211.  
17  
18  
19 577 35. Ajzen I, Manstead ASR. Changing health-related behaviours: An approach based on the  
20 578 Theory of Planned Behaviour. In: Hewstone M, Schut H, de Wit J, Van Den Bos K, Stroebe  
21 579 M, editors. *The scope of social psychology: Theory and applications.* New York: Psychology  
22 580 Press; 2007. p. 43–63.  
23  
24  
25  
26 581 36. Dunlap WP, Cortina JM, Vaslow JB, Burke MJ. Meta-analysis of experiments with matched  
27 582 groups or repeated measures designs. *Psychol Methods.* 1996;1:170–7.  
28  
29  
30 583 37. Lakens D. Calculating and reporting effect sizes to facilitate cumulative science: a practical  
31 584 primer for t-tests and ANOVAs. *Front Psychol.* 2013;4:1–12.  
32  
33  
34 585 38. de Jager E, Gunnarsson R, Ho YH. Implementation of the World Health Organization  
35 586 Surgical Safety Checklist Correlates with Reduced Surgical Mortality and Length of Hospital  
36 587 Admission in a High-Income Country. *World J Surg.* 2019;43:117–24.  
37  
38  
39  
40 588 39. Berry WR, Edmondson L, Gibbons LR, Childers AK, Haynes AB, Foster R, et al. Scaling  
41 589 safety: The south carolina surgical safety checklist experience. *Health Aff.* 2018;37:1779–  
42 590 86.  
43  
44  
45 591 40. Dixon-Woods M, Martin GP. Does quality improvement improve quality? *Futur Hosp J.*  
46 592 2016;3:191–4.  
47  
48  
49 593 41. Böhmer AB, Kindermann P, Schwanke U, Bellendir M, Tinschmann T, Schmidt C, et al.  
50 594 Long-term effects of a perioperative safety checklist from the viewpoint of personnel. *Acta*  
51 595 *Anaesthesiol Scand.* 2013;57:150–7.  
52  
53  
54  
55 596 42. Niederhauser A, Züllig S, Marschall J, Schwappach DLB, Progress! C group. Nurses' and  
56 597 Physicians' Perceptions of Indwelling Urinary Catheter Practices and Culture in Their  
57 598 Institutions. *J Patient Saf.* 2018;00:1–8.  
58  
59  
60

- 1  
2  
3  
4 599 43. Galiczewski JM, Shurpin KM. An intervention to improve the catheter associated urinary  
5 tract infection rate in a medical intensive care unit: Direct observation of catheter insertion  
6 600 procedure. *Intensive Crit Care Nurs.* 2017;40:26–34.  
7 601  
8  
9  
10 602 44. Burke RE, Shojania KG. Rigorous evaluations of evolving interventions: Can we have our  
11 603 cake and eat it too? *BMJ Qual Saf.* 2018;27:251–4.  
12  
13  
14 604 45. Dykema J, Jones NR, Piché T, Stevenson J. Surveying Clinicians by Web: Current Issues in  
15 605 Design and Administration. *Eval Heal Prof.* 2013;36:352–81.  
16  
17  
18 606  
19  
20 607  
21  
22  
23  
24  
25  
26  
27  
28  
29  
30  
31  
32  
33  
34  
35  
36  
37  
38  
39  
40  
41  
42  
43  
44  
45  
46  
47  
48  
49  
50  
51  
52  
53  
54  
55  
56  
57  
58  
59  
60

For peer review only



Figure 1. Self-reported responsibilities in regard to urinary catheters by profession

152x110mm (300 x 300 DPI)



## Appendix 1. List of indications for indwelling urinary catheters

Note: This list does not cover urological emergencies. Treatment for these cases is decided by the urologist.

No indications for a urinary catheter are:

Asymptomatic chronic urinary retention

Urine output monitoring / fluid monitoring for stable patients, if daily weight control is possible

Need for intensive care

Urinary incontinence

Immobilization, as long as alternative methods<sup>1</sup> for controlled bladder drainage have not been exhausted

Comfort from the perspective of the patient (or their trusted representative) OR from the perspective of staff

| Indication                        | Specification                                                                                                                                                                                                                                                                               |
|-----------------------------------|---------------------------------------------------------------------------------------------------------------------------------------------------------------------------------------------------------------------------------------------------------------------------------------------|
| Urinary retention                 | Acute urinary retention of any origin<br>Symptomatic chronic outflow obstruction PLUS >300 ml residual urine                                                                                                                                                                                |
| Urine output monitoring           | In regular, short intervals (hourly or as defined by hospital) PLUS direct therapeutic consequences from monitoring, if body weight of patient cannot be measured                                                                                                                           |
| Surgery                           | Long surgery (>4h)<br>Perioperative: for surgical reasons, if bladder has to be empty. Catheter is to be removed at the end of the surgery<br>Urogenital surgery and/or pelvic floor surgery<br>Epidural / peridural anesthesia/analgesia                                                   |
| Pressure ulcers PLUS incontinence | Pressure ulcers stage III or IV, or sacral/perineal skin transplants PLUS incontinence, if alternative methods <sup>1</sup> for controlled bladder drainage failed                                                                                                                          |
| Prolonged immobilization          | Immobilization for medical reasons, especially for pain reduction, if alternative methods <sup>1</sup> for controlled bladder drainage failed                                                                                                                                               |
| Palliation PLUS Comfort           | Terminal-palliative situation PLUS dysfunction of bladder PLUS/OR difficulties with normal voiding, if alternative methods <sup>1</sup> for controlled bladder drainage failed<br>Severe psychological strain PLUS at the request of the informed patient (or their trusted representative) |

<sup>1</sup> Alternative methods are: condom catheter, urinal, bedpan, bedside commode, incontinence pads, pants

List was translated for this publication by the authors.

## Appendix 2. Questionnaire

---

### Personal ID

First we ask you to create a personal identification number (ID). As part of the program progress! Safe urinary catheterization, you will complete questionnaires at two different points in time. This ID will help us match the two different questionnaires to one person, and to recognize the information coming from one and the same person. At the same time, the ID protects your anonymity, as you cannot be personally identified. This is how you create your personal ID:

The ID consists of your mother's initials (maiden name), your father's initials and your mother's birth year. Example: Mother: Hannah Kaufmann, Father: Peter Muller, Mothers birth year: 1931 → ID: HKPM1931

### Part 1 (correct answers provided in parentheses)

#### Please estimate:

How many patients in Switzerland receive a catheter during their hospital stay?  
(10-25%)

#### Please indicate if the following statements are correct:

After 30 catheter-days, nearly all patients show bacteriuria. (correct)

The duration of catheterization is an important risk factor for the development of a urinary tract infection. (correct)

Most hospital-acquired urinary tract infections are associated with a urinary catheter. (correct)

Single-use urinary catheters carry a higher risk for infections as compared to indwelling catheters. (false)

A closed drainage system is essential for the prevention of catheter-associated urinary tract infections. (correct)

Compared to catheters, non-invasive methods for bladder draining (e.g., condom catheters, incontinence pads) have the advantage that they do not carry a risk for injuries. (correct)

Non-infectious complications (e.g., injuries or allergic reactions) only occur in absolutely rare instances during catheterization. (false)

The choice of an antiseptic for disinfecting the urethral meatus does not affect the correct asepsis when inserting a catheter. (false)

Up to 50 percent of catheters placed in an emergency department are not medically justified. (correct)

One effective measure to prevent catheter-associated urinary tract infections is to change catheters or drainage bags in regular intervals. (false)

#### In which of these situations is the placement of a urinary catheter indicated?

To monitor urine output in stable patients who can be weighed. (not indicated)

In case of distress at the request of a terminally ill patient. (indicated)

For patients requiring intensive care. (not indicated)

For patients with restricted mobility. (not indicated)

### Part 2

#### Please indicate if you agree with the following statements:<sup>1</sup>

On my unit, IUCs are placed only as clearly indicated medical measure.

For medical leadership on my unit, restrictive use of IUCs is very important.

For nursing leadership on my unit, restrictive use of IUCs is very important.

Nursing workload plays an important role when a decision for placing an IUC is made.

People in charge on my unit make sure that everyone placing IUCs is sufficiently trained for this task.

Whenever possible, staff on my unit tries to use alternatives to an IUC (e.g., condom catheters, incontinence pads).

1  
2  
3 The daily assessment to evaluate if an IUC is still needed is a given for us.

4 Basic infection prevention measures are well complied with during placement and care of  
5 IUCs.

6 If someone needs help when placing an IUC, it is clear on my unit who can be contacted.

7 Medical and nursing staff on my unit have a similar attitude concerning the use of IUCs.

8 For staff members on my unit, it is a matter of course to openly question the placement of an  
9 IUC.

10 It is difficult on my unit to speak up when rules of hygiene are broken during placement and  
11 care of an IUC.

12 It is common on my unit that, whenever possible, two healthcare workers work together to  
13 place a catheter.

### 14 **Part 3**

15 **What is your own role regarding the use of catheters? Please select all answers that  
16 apply.**

17 It is part of my responsibility to...

18 ...write orders for IUC placement

19 ...write orders for IUC removal

20 ...place an IUC

21 ...assist another professional with placing an IUC

22 ...care for an indwelling catheter

23 ...assess the continued need for an IUC

24 ...remove an IUC

### 25 **Part 4**

26 **Please indicate if you agree with the following statements:<sup>1</sup>**

27 I can properly estimate in which situations the use of an IUC is appropriate.

28 My colleagues appreciate my commitment to reduce the use of IUCs.

29 I can influence the use of IUCs in my daily work.

30 The risk from IUCs for patients is underestimated.

31 I find it difficult in my daily work to reduce the use of IUCs.

32 In my hospital I am expected to contribute to the reduction of IUCs.

33 I am convinced that I am proficient in caring for an indwelling catheter.

34 I am convinced that by reducing the use of IUCs, adverse events to patients can be avoided.

35 Our patients appreciate it when IUCs are avoided.

36 A reduced use of IUCs makes patient care more stressful for me.

37 My supervisors expect that everyone follows the internal protocols for inserting catheters.

38 I am convinced that I am proficient in inserting a urinary catheter.

39 I think that it's important to reduce the use of IUCs in the hospital.

40 My supervisors expect me to reduce the use of IUCs.

41 I am confident that I can reduce the use of IUCs in everyday work.

### 42 **Part 5 (response categories in parentheses)**

43 How old are you?

44 Gender (female, male)

45 In which professional role are you currently working?

46 (surgical positioning specialist, healthcare assistant, registered nurse, nursing manager,  
47 physician resident, attending physician, senior physician, chief physician, other)

48 How long have you been working in this hospital? (< 2 years, 2 to < 5 years, 5 to < 10 years,  
49 10 to < 20 years, ≥ 20 years)

50 How many working hours do you spend in patient care during a typical working week? (less  
51 than 10 hours, between 10-24 hours, between 25-39 hours, 40 hours or more)

1  
2  
3 How often have you placed a urinary catheter throughout your professional career  
4 (estimate)? (never, 1-5 times, 6-20 times, > 20 times)

5 How often do you place a urinary catheter in your current position (estimate)?

6 (never, rarely (a few times a year), sometimes (a few times a month), often (a few times a  
7 week))

8 Where have you primarily been working in the past three months?

9 (ward, emergency department, intensive care unit, operating room, other)

10 In which medical area do you work primarily?

11 (Anesthesiology, Surgery, Obstetrics/Gynecology, Internal medicine, Neurology, orthopedics,  
12 Radiology, Urology, in several medical areas, other)

13 Do you have additional any additional comments?

14  
15 **Items only included at T<sub>1</sub>**

16 Are you familiar with the indication list that has been implemented as part of the program  
17 “progress! Safe urinary catheterization“? (yes, no)

18 Have you participated at a training as part of the program “progress! Safe urinary  
19 catheterization“?

20 - Theoretical training (yes, no)

21 - Practical training (yes, no)

22 How do you evaluate the participation of your unit in the program “progress! Safe urinary  
23 catheterization“? (very positive, rather positive, neutral, rather negative, very negative, don't  
24 know the program)

25  
26  
27  
28 

---

Items translated from German original by the authors.

29 <sup>1</sup> Items were answered on a Likert-scale from 1 (do not agree at all) to 7 (completely agree)

**Appendix 3. Knowledge – % correct answers provided per item**

|                                                                                                                                                                                       | % T <sub>0</sub><br>n = 1,579 | % T <sub>1</sub><br>n = 1,527 |
|---------------------------------------------------------------------------------------------------------------------------------------------------------------------------------------|-------------------------------|-------------------------------|
| <b>Please estimate:</b>                                                                                                                                                               |                               |                               |
| How many patients in Switzerland receive a catheter during their hospital stay? (10-25%)                                                                                              | 37.6                          | 39.1                          |
| <b>Please indicate if the following statements are correct:</b>                                                                                                                       |                               |                               |
| After 30 catheter-days, nearly all patients show bacteriuria. (correct)                                                                                                               | 81.6                          | 86.9                          |
| The duration of catheterization is an important risk factor for the development of a urinary tract infection. (correct)                                                               | 98.0                          | 98.9                          |
| Most hospital-acquired urinary tract infections are associated with a urinary catheter. (correct)                                                                                     | 82.2                          | 86.3                          |
| Single-use urinary catheters carry a higher risk for infections as compared to indwelling catheters. (false)                                                                          | 89.9                          | 91.9                          |
| A closed drainage system is essential for the prevention of catheter-associated urinary tract infections. (correct)                                                                   | 77.4                          | 82.0                          |
| Compared to catheters, non-invasive methods for bladder draining (e.g., condom catheters, incontinence pads) have the advantage that they do not carry a risk for injuries. (correct) | 62.4                          | 69.0                          |
| Non-infectious complications (e.g., injuries or allergic reactions) only occur in absolutely rare instances during catheterization. (false)                                           | 61.2                          | 68.8                          |
| The choice of an antiseptic for disinfecting the urethral meatus does not affect the correct asepsis when inserting a catheter. (false)                                               | 80.6                          | 82.6                          |
| Up to 50 percent of catheters placed in an emergency department are not medically justified. (correct)                                                                                | 61.4                          | 73.8                          |
| One effective measure to prevent catheter-associated urinary tract infections is to change catheters or drainage bags in regular intervals. (false)                                   | 30.4                          | 36.2                          |
| <b>In which of these situations is the placement of a urinary catheter indicated?</b>                                                                                                 |                               |                               |
| To monitor urine output in stable patients who can be weighed. (not indicated)                                                                                                        | 97.5                          | 98.1                          |
| In case of distress at the request of a terminally ill patient. (indicated)                                                                                                           | 93.3                          | 93.2                          |
| For patients requiring intensive care. (not indicated)                                                                                                                                | 21.2                          | 32.3                          |
| For patients with restricted mobility. (not indicated)                                                                                                                                | 79.9                          | 81.4                          |

Correct answers for knowledge items are provided in parentheses. Items were translated for this publication by the authors. Sample size differs slightly for each item due to a varying number of missing values.

#### Appendix 4. Perception of practices and culture – Mean and standard deviation per item

|                                                                                                                      | Mean T <sub>0</sub><br>(SD)<br>n = 1,579 | Mean T <sub>1</sub><br>(SD)<br>n = 1,527 | p-value |
|----------------------------------------------------------------------------------------------------------------------|------------------------------------------|------------------------------------------|---------|
| On my unit, IUCs are placed only as clearly indicated medical measure.                                               | 5.5 (1.4)                                | 5.7 (1.3)                                | <0.001  |
| For medical leadership on my unit, restrictive use of IUCs is very important.                                        | 5.1 (1.6)                                | 5.4 (1.4)                                | <0.001  |
| For nursing leadership on my unit, restrictive use of IUCs is very important.                                        | 5.1 (1.5)                                | 5.7 (1.3)                                | <0.001  |
| Nursing workload plays an important role when a decision for placing an IUC is made.                                 | 2.8 (1.8)                                | 2.5 (1.6)                                | <0.001  |
| People in charge on my unit make sure that everyone placing IUCs is sufficiently trained for this task.              | 5.4 (1.7)                                | 5.6 (1.5)                                | <0.001  |
| Whenever possible, staff on my unit tries to use alternatives to an IUC (e.g., condom catheters, incontinence pads). | 4.7 (1.8)                                | 5.1 (1.7)                                | <0.001  |
| The daily assessment to evaluate if an IUC is still needed is a given for us.                                        | 5.3 (1.6)                                | 5.6 (1.5)                                | <0.001  |
| Basic infection prevention measures are well complied with during placement and care of IUCs.                        | 6.0 (1.1)                                | 6.1 (1.0)                                | 0.0219  |
| If someone needs help when placing an IUC, it is clear on my unit who can be contacted.                              | 5.8 (1.5)                                | 5.9 (1.4)                                | 0.2649  |
| Medical and nursing staff on my unit have a similar attitude concerning the use of IUCs.                             | 5.1 (1.4)                                | 5.3 (1.4)                                | 0.0016  |
| For staff members on my unit, it is a matter of course to openly question the placement of an IUC.                   | 5.5 (1.4)                                | 5.7 (1.2)                                | <0.001  |
| It is difficult on my unit to speak up when rules of hygiene are broken during placement and care of an IUC.         | 2.9 (1.7)                                | 2.8 (1.6)                                | 0.0358  |
| It is common on my unit that, whenever possible, two healthcare workers work together to place a catheter.           | 5.0 (1.9)                                | 5.2 (1.7)                                | <0.001  |

Items were translated for this publication by the authors. Sample size differs slightly for each item due to a varying number of missing values.

### Appendix 5. Determinants of personal behavior – Mean and standard deviation per item

|                                                                                             | Mean T <sub>0</sub><br>(SD)<br>n = 1,579 | Mean T <sub>1</sub><br>(SD)<br>n = 1,527 | p-value |
|---------------------------------------------------------------------------------------------|------------------------------------------|------------------------------------------|---------|
| <b>Perceived behavioral control</b>                                                         |                                          |                                          |         |
| I can properly estimate in which situations the use of an IUC is appropriate.               | 6.1 (1.0)                                | 6.1 (1.0)                                | 0.2587  |
| I can influence the use of IUCs in my daily work.                                           | 5.5 (1.4)                                | 5.7 (1.4)                                | 0.0004  |
| I am convinced that I am proficient in caring for an indwelling catheter.                   | 5.5 (1.6)                                | 5.6 (1.6)                                | 0.0343  |
| I am convinced that I am proficient in inserting a urinary catheter.                        | 5.7 (1.5)                                | 5.7 (1.4)                                | 0.5490  |
| I am confident that I can reduce the use of IUCs in everyday work.                          | 5.0 (1.5)                                | 5.5 (1.4)                                | <0.001  |
| <b>Subjective Norms</b>                                                                     |                                          |                                          |         |
| My colleagues appreciate my commitment to reduce the use of IUCs.                           | 5.1 (1.5)                                | 5.4 (1.4)                                | <0.001  |
| In my hospital I am expected to contribute to the reduction of IUCs.                        | 4.6 (1.8)                                | 5.7 (1.5)                                | <0.001  |
| Our patients appreciate it when IUCs are avoided.                                           | 5.5 (1.4)                                | 5.6 (1.4)                                | 0.0442  |
| My supervisors expect that everyone follows the internal protocols for inserting catheters. | 6.0 (1.2)                                | 6.1 (1.2)                                | 0.0125  |
| My supervisors expect me to reduce the use of IUCs.                                         | 4.5 (1.7)                                | 5.5 (1.5)                                | <0.001  |
| <b>Attitudes</b>                                                                            |                                          |                                          |         |
| The risk from IUCs for patients is underestimated.                                          | 5.1 (1.6)                                | 5.0 (1.8)                                | 0.0044  |
| I find it difficult in my daily work to reduce the use of IUCs.                             | 3.7 (1.7)                                | 3.3 (1.6)                                | <0.001  |
| I am convinced that by reducing the use of IUCs, adverse events to patients can be avoided. | 5.8 (1.3)                                | 6.1 (1.1)                                | <0.001  |
| A reduced use of IUCs makes patient care more stressful for me.                             | 3.0 (1.8)                                | 2.9 (1.7)                                | 0.0045  |
| I think that it's important to reduce the use of IUCs in the hospital.                      | 5.7 (1.3)                                | 6.0 (1.2)                                | <0.001  |

Items were translated for this publication by the authors. Items are presented according to their construct (perceived behavioral control, subjective norm and attitudes). In the questionnaire, order of the items was randomized. Sample size differs slightly for each item due to a varying number of missing values.

**STROBE 2007 (v4) Statement—Checklist of items that should be included in reports of *cross-sectional studies***

| Section/Topic                | Item # | Recommendation                                                                                                                                                                       | Reported on page # |
|------------------------------|--------|--------------------------------------------------------------------------------------------------------------------------------------------------------------------------------------|--------------------|
| Title and abstract           | 1      | (a) Indicate the study's design with a commonly used term in the title or the abstract                                                                                               | title page         |
|                              |        | (b) Provide in the abstract an informative and balanced summary of what was done and what was found                                                                                  | p.2                |
| <b>Introduction</b>          |        |                                                                                                                                                                                      |                    |
| Background/rationale         | 2      | Explain the scientific background and rationale for the investigation being reported                                                                                                 | p.3-4              |
| Objectives                   | 3      | State specific objectives, including any prespecified hypotheses                                                                                                                     | p.3-4              |
| <b>Methods</b>               |        |                                                                                                                                                                                      |                    |
| Study design                 | 4      | Present key elements of study design early in the paper                                                                                                                              | p.5                |
| Setting                      | 5      | Describe the setting, locations, and relevant dates, including periods of recruitment, exposure, follow-up, and data collection                                                      | p.4 & p.5          |
| Participants                 | 6      | (a) Give the eligibility criteria, and the sources and methods of selection of participants                                                                                          | p.5 & p.6          |
| Variables                    | 7      | Clearly define all outcomes, exposures, predictors, potential confounders, and effect modifiers. Give diagnostic criteria, if applicable                                             | p.5-6              |
| Data sources/<br>measurement | 8*     | For each variable of interest, give sources of data and details of methods of assessment (measurement). Describe comparability of assessment methods if there is more than one group | N/A                |
| Bias                         | 9      | Describe any efforts to address potential sources of bias                                                                                                                            | N/A                |
| Study size                   | 10     | Explain how the study size was arrived at                                                                                                                                            | p.6                |
| Quantitative variables       | 11     | Explain how quantitative variables were handled in the analyses. If applicable, describe which groupings were chosen and why                                                         | p.6-7              |
| Statistical methods          | 12     | (a) Describe all statistical methods, including those used to control for confounding                                                                                                | p.6-7              |
|                              |        | (b) Describe any methods used to examine subgroups and interactions                                                                                                                  | p.6-7              |
|                              |        | (c) Explain how missing data were addressed                                                                                                                                          | p.6-7              |
|                              |        | (d) If applicable, describe analytical methods taking account of sampling strategy                                                                                                   | N/A                |
|                              |        | (e) Describe any sensitivity analyses                                                                                                                                                | N/A                |



|                          |     |                                                                                                                                                                                                              |               |
|--------------------------|-----|--------------------------------------------------------------------------------------------------------------------------------------------------------------------------------------------------------------|---------------|
| <b>Results</b>           |     |                                                                                                                                                                                                              |               |
| Participants             | 13* | (a) Report numbers of individuals at each stage of study—eg numbers potentially eligible, examined for eligibility, confirmed eligible, included in the study, completing follow-up, and analysed            | p.7           |
|                          |     | (b) Give reasons for non-participation at each stage                                                                                                                                                         | N/A           |
|                          |     | (c) Consider use of a flow diagram                                                                                                                                                                           | N/A           |
| Descriptive data         | 14* | (a) Give characteristics of study participants (eg demographic, clinical, social) and information on exposures and potential confounders                                                                     | p.8 (table 1) |
|                          |     | (b) Indicate number of participants with missing data for each variable of interest                                                                                                                          | p.8 (table 1) |
| Outcome data             | 15* | Report numbers of outcome events or summary measures                                                                                                                                                         | p.9-11        |
| Main results             | 16  | (a) Give unadjusted estimates and, if applicable, confounder-adjusted estimates and their precision (eg, 95% confidence interval). Make clear which confounders were adjusted for and why they were included | N/A           |
|                          |     | (b) Report category boundaries when continuous variables were categorized                                                                                                                                    | N/A           |
|                          |     | (c) If relevant, consider translating estimates of relative risk into absolute risk for a meaningful time period                                                                                             | N/A           |
| Other analyses           | 17  | Report other analyses done—eg analyses of subgroups and interactions, and sensitivity analyses                                                                                                               | p.9           |
| <b>Discussion</b>        |     |                                                                                                                                                                                                              |               |
| Key results              | 18  | Summarise key results with reference to study objectives                                                                                                                                                     | p.11-13       |
| Limitations              | 19  | Discuss limitations of the study, taking into account sources of potential bias or imprecision. Discuss both direction and magnitude of any potential bias                                                   | p.13-14       |
| Interpretation           | 20  | Give a cautious overall interpretation of results considering objectives, limitations, multiplicity of analyses, results from similar studies, and other relevant evidence                                   | p.14          |
| Generalisability         | 21  | Discuss the generalisability (external validity) of the study results                                                                                                                                        | p.13          |
| <b>Other information</b> |     |                                                                                                                                                                                                              |               |
| Funding                  | 22  | Give the source of funding and the role of the funders for the present study and, if applicable, for the original study on which the present article is based                                                | p14           |

\*Give information separately for cases and controls in case-control studies and, if applicable, for exposed and unexposed groups in cohort and cross-sectional studies.

**Note:** An Explanation and Elaboration article discusses each checklist item and gives methodological background and published examples of transparent reporting. The STROBE checklist is best used in conjunction with this article (freely available on the Web sites of PLoS Medicine at <http://www.plosmedicine.org/>, Annals of Internal Medicine at <http://www.annals.org/>, and Epidemiology at <http://www.epidem.com/>). Information on the STROBE Initiative is available at [www.strobe-statement.org](http://www.strobe-statement.org).
